# Supplementary material
Source: MDPI journal article supplement (https://www.mdpi.com/2624-862X/3/1/4)
Supplement: s1 [file s1]

Archive with 4 entries (4 files):
- Suppl. figures S1-3.pdf
- Table S1.xlsx
- Table S2.xlsx
- Table S3.xlsx
