# Supplementary material
Source: MDPI journal article supplement (https://www.mdpi.com/2624-862X/3/1/4)
Supplement: s1 [file s1 › Table S1.xlsx]

## Sheet: Sheet1
Cow	Fat (g/100g)	Protein (g/100g)	Lactose (g/100g)
1	3.61	2.77	4.03
2	3.89	2.8	3.7
3	3.65	2.77	3.61
4	4.48	3.04	3.91
5	3.85	2.63	3.67
6	4.33	2.77	4.21
7	6.62	4.69	5.01
8	4.59	3.1	4.09
9	4.26	3.4	4.31
10	2.64	1.97	3.06
11	5.73	4.09	4.13
12	4.9	3.51	3.87
13	4.18	3.58	4.77
14	3.13	2.52	3.31
15	4.59	3.28	4.15
16	3.52	2.73	3.85
17	3.04	2.31	3.16
