# Supplementary material
Source: MDPI journal article supplement (https://www.mdpi.com/2624-862X/3/1/4)
Supplement: s1 [file s1 › Table S2.xlsx]

## Sheet: Blad1
Protein Descriptions	Peptides	Unique Peptides	iBAQ Cow13_0_day	iBAQ Cow13_1_month	iBAQ Cow13_2_month	iBAQ Cow13_2_week	iBAQ Cow13_3_month	iBAQ Cow36_0_day	iBAQ Cow36_1_month	iBAQ Cow36_2_month	iBAQ Cow36_2_week	iBAQ Cow36_3_month	iBAQ Cow47_0_day	iBAQ Cow47_1_month	iBAQ Cow47_2_month	iBAQ Cow47_2_week	iBAQ Cow47_3_month	iBAQ Cow49_0_day	iBAQ Cow49_1_month	iBAQ Cow49_2_month	iBAQ Cow49_2_week	iBAQ Cow49_3_month	ANOVA Significant_lactation	ANOVA Significant_individual	N: -Log ANOVA p value	N: ANOVA q-value	N: -Log ANOVA p value_	N: ANOVA q-value_	Proteins
>sp|Q9XSG3|IDHC_BOVIN Isocitrate dehydrogenase [NADP] cytoplasmic OS=Bos taurus GN=IDH1 PE=2 SV=1;>tr|Q0QEQ4|Q0QEQ4_BOVIN Isocitrate dehydrogenase [NADP] (Fragment) OS=Bos taurus GN=IDH1 PE=2 SV=1	17	16	5.74625	5.36814	5.4289	5.545	5.52372	5.72784	5.46237	5.54774	5.4494	5.47419	5.22149	5.04466	5.11511	5.31879	5.51511	5.7041	5.78735	5.56356	5.66815	5.76323		+	0.135934	1	3.07818	0.00628948	2
>tr|E1B726|E1B726_BOVIN Uncharacterized protein OS=Bos taurus GN=PLG PE=3 SV=2;>sp|P06868|PLMN_BOVIN Plasminogen OS=Bos taurus GN=PLG PE=1 SV=2;>tr|F1MJB7|F1MJB7_BOVIN Uncharacterized protein OS=Bos taurus GN=Bt.306 PE=3 SV=1;>tr|A7E350|A7E350_BOVIN PLG pr	7	7	4.49733	3.74691	4.15174	4.42742	4.34667	4.11008	4.34494	4.10582	4.02816	4.24017	3.48993	3.2842	3.33143	3.71192	3.72042	3.63874	4.10479	3.53624	3.69345	3.44462		+	0.0739868	1	3.63505	0.00282803	4
>sp|Q3SZV7|HEMO_BOVIN Hemopexin OS=Bos taurus GN=HPX PE=2 SV=1	6	6	5.52524	5.44993	5.76299	5.76119	5.74271	5.21767	5.48017	5.59072	5.84669	5.34624	4.69807	4.99932	5.20534	5.0172	5.07471	5.40761	5.55677	5.49244	5.39632	5.3995		+	0.17252	1	3.8302	0.00220193	1
>tr|G3X7D2|G3X7D2_BOVIN Uncharacterized protein OS=Bos taurus GN=Bt.89233 PE=4 SV=1;>sp|P30922|CH3L1_BOVIN Chitinase-3-like protein 1 OS=Bos taurus GN=CHI3L1 PE=1 SV=3	10	10	5.48008	4.85129	5.3978	5.56521	5.44034	4.57242	4.74158	4.61343	4.24652	4.45422	3.7957	4.1978	4.59651	4.46036	4.29864	4.19524	4.39424	4.15217	4.09968	3.81266		+	0.0140487	1	5.36883	0.000159687	2
>tr|B0JYN3|B0JYN3_BOVIN L-lactate dehydrogenase OS=Bos taurus GN=LDHB PE=2 SV=1;>sp|Q5E9B1|LDHB_BOVIN L-lactate dehydrogenase B chain OS=Bos taurus GN=LDHB PE=2 SV=4	5	5	4.9808	4.52631	4.74606	5.01824	4.82927	4.96672	4.69623	4.87776	4.47904	4.36369	4.13953	3.89582	3.94461	4.18577	4.44192	4.70194	4.68366	4.44761	4.42812	4.61684		+	0.0385921	1	3.39448	0.00451587	7
>sp|P17697|CLUS_BOVIN Clusterin OS=Bos taurus GN=CLU PE=1 SV=1	15	13	6.52769	6.09548	6.40741	6.56493	6.41335	5.72833	5.91271	5.85422	5.74604	5.92355	5.38489	5.73605	5.78099	5.77749	5.63289	5.57005	5.9883	5.81082	5.6891	5.96049		+	0.0279105	1	5.058	0.000244993	1
>tr|F1MBN6|F1MBN6_BOVIN Uncharacterized protein (Fragment) OS=Bos taurus GN=Bt.18557 PE=4 SV=1;>tr|F1N045|F1N045_BOVIN Uncharacterized protein OS=Bos taurus GN=C7 PE=4 SV=1	18	3	4.82107	4.21221	4.46099	4.91455	4.72992	5.04305	5.24596	4.87309	4.75348	5.11518	4.51112	4.71659	4.61151	4.77003	4.64603	4.25276	4.66719	4.20871	4.43193	4.61792		+	0.13867	1	2.36103	0.0207551	2
>tr|F1N726|F1N726_BOVIN Uncharacterized protein OS=Bos taurus GN=GP2 PE=4 SV=1;>tr|Q0IIA4|Q0IIA4_BOVIN Glycoprotein 2 (Zymogen granule membrane) OS=Bos taurus GN=GP2 PE=2 SV=1	17	17	6.39328	5.2668	5.5287	6.08365	5.50466	4.82758	4.98002	5.05177	4.37985	4.9515	5.60534	5.365	5.25873	5.60784	5.86168	5.90586	5.87207	5.66331	5.58918	6.11691		+	0.0412997	1	3.33863	0.004891	2
>sp|Q3SZR3|A1AG_BOVIN Alpha-1-acid glycoprotein OS=Bos taurus GN=ORM1 PE=2 SV=1;>tr|Q5GN72|Q5GN72_BOVIN Alpha-1 acid glycoprotein OS=Bos taurus GN=agp PE=2 SV=2;>tr|E1BEB5|E1BEB5_BOVIN Uncharacterized protein OS=Bos taurus GN=ORM1 PE=4 SV=1	10	10	6.26463	5.78767	6.06209	6.22912	6.11471	6.45387	6.67791	6.5066	6.93112	6.47236	6.06194	6.19435	6.24415	6.19501	6.27056	6.33656	6.45909	6.31796	6.12001	6.38826		+	0.037264	1	3.26369	0.00530672	3
>tr|E1BH06|E1BH06_BOVIN Uncharacterized protein OS=Bos taurus GN=Bt.105154 PE=4 SV=2;>sp|P01030|CO4_BOVIN Complement C4 (Fragments) OS=Bos taurus GN=C4 PE=1 SV=2	27	3	5.14151	4.56561	4.83802	5.32461	4.93255	4.8123	5.00629	4.92361	4.72959	4.93018	3.99472	4.2392	4.32067	4.48206	4.40204	4.48266	4.33614	4.36823	4.34498	4.4466		+	0.0781327	1	4.49293	0.000654518	3
>tr|A5PJ79|A5PJ79_BOVIN TKT protein OS=Bos taurus GN=TKT PE=2 SV=1;>tr|A7Z014|A7Z014_BOVIN TKT protein OS=Bos taurus GN=TKT PE=2 SV=1;>tr|A7E3W4|A7E3W4_BOVIN Transketolase OS=Bos taurus GN=TKT PE=2 SV=1;>sp|Q6B855|TKT_BOVIN Transketolase OS=Bos taurus GN=T	5	5	4.65206	4.02473	4.23646	4.47075	4.34068	4.23925	4.18503	4.00406	3.93726	3.94243	3.85542	3.80099	3.68162	3.76428	3.91647	3.87411	4.16185	3.91742	3.65391	3.75701		+	0.0399415	1	3.15991	0.00553574	5
>tr|B3VTM3|B3VTM3_BOVIN Lactoferrin OS=Bos taurus PE=2 SV=1;>tr|B9VPZ5|B9VPZ5_BOVIN Lactoferrin OS=Bos taurus GN=LF PE=2 SV=1;>sp|P24627|TRFL_BOVIN Lactotransferrin OS=Bos taurus GN=LTF PE=1 SV=2;>tr|C7FE01|C7FE01_BOVIN Lactoferrin (Fragment) OS=Bos taurus	80	74	7.5075	6.66791	7.11008	7.33806	7.24961	7.20011	7.33762	7.20049	6.96519	7.11344	6.13252	6.52933	6.64432	6.64341	6.6467	6.97063	7.15357	6.82231	6.78787	6.99225		+	0.000436773	1	3.1934	0.00553574	13
>sp|Q3ZCH5|ZA2G_BOVIN Zinc-alpha-2-glycoprotein OS=Bos taurus GN=AZGP1 PE=2 SV=1	22	22	7.25847	6.56666	6.93233	6.97244	6.9879	6.99232	6.95612	6.82954	6.84663	6.98017	6.37453	6.55246	6.59783	6.95479	6.41721	6.41661	6.50349	6.43857	6.4327	6.59616		+	0.117315	1	2.99522	0.00686306	4
>tr|E1BHY6|E1BHY6_BOVIN Uncharacterized protein OS=Bos taurus GN=Bt.12944 PE=4 SV=2;>tr|F1MVU8|F1MVU8_BOVIN Uncharacterized protein OS=Bos taurus GN=Bt.12944 PE=4 SV=1;>tr|Q2HJI6|Q2HJI6_BOVIN Granulin OS=Bos taurus GN=GRN PE=2 SV=1	3	3	4.21256	3.8605	4.05204	4.32197	4.35759	3.86511	3.99105	3.97401	4.0498	4.149	2.80088	3.60502	3.63097	3.75749	3.85495	NaN	3.56834	2.63199	3.29195	3.13014		+	0.286281	1	3.19126	0.00553574	3
>sp|P31096|OSTP_BOVIN Osteopontin OS=Bos taurus GN=SPP1 PE=1 SV=2;>tr|F1MI46|F1MI46_BOVIN Uncharacterized protein OS=Bos taurus GN=SPP1 PE=4 SV=1;>tr|Q2QCT5|Q2QCT5_BOVIN Osteopontin (Fragment) OS=Bos taurus PE=2 SV=1;>sp|P31098|OSTK_BOVIN Osteopontin-K OS=	22	22	7.13094	6.42071	6.78529	6.978	7.02829	7.25479	7.38823	7.24032	7.3024	7.59928	6.87288	6.9604	6.80956	6.98954	7.03755	7.26112	7.74121	7.18224	7.44511	7.34258		+	0.0255373	1	3.1731	0.00553574	5
>sp|P19660|CTHL2_BOVIN Cathelicidin-2 OS=Bos taurus GN=CATHL2 PE=1 SV=2;>tr|B9TUC9|B9TUC9_BOVIN Cathelicidin 7 OS=Bos taurus PE=4 SV=1;>sp|P56425|CTHL7_BOVIN Cathelicidin-7 OS=Bos taurus GN=CATHL7 PE=2 SV=1;>tr|B9UKM7|B9UKM7_BOVIN Cathelicidin 6 OS=Bos tau	2	2	5.10192	4.97195	4.93584	5.29662	5.16319	4.29159	3.4445	NaN	4.36403	3.88525	4.07606	NaN	NaN	4.20677	NaN	4.38324	NaN	NaN	NaN	NaN		+	0.0337479	1	3.04854	0.00628948	10
>sp|P02668|CASK_BOVIN Kappa-casein OS=Bos taurus GN=CSN3 PE=1 SV=1;>tr|A3FJ56|A3FJ56_BOVIN Kappa casein (Fragment) OS=Bos taurus PE=4 SV=1;>tr|Q705V4|Q705V4_BOVIN Kappa-casein (Fragment) OS=Bos taurus GN=csn3 PE=4 SV=1;>tr|E7E1P7|E7E1P7_BOVIN Kappa casein	8	8	7.77781	7.40396	7.3385	7.38691	7.43905	6.84251	6.95073	6.93336	6.90478	7.0558	6.90125	6.96009	7.02461	7.059	7.64285	7.79187	7.39494	7.22446	7.34272	7.67408		+	0.109231	1	2.74194	0.010405	8
>tr|F1MNT4|F1MNT4_BOVIN Uncharacterized protein (Fragment) OS=Bos taurus GN=LAMB1 PE=4 SV=2	10	10	4.31086	3.25363	3.29115	4.19382	3.6567	3.93844	4.28226	4.04735	3.76471	4.20919	3.34349	3.39449	3.10312	3.74633	3.21924	3.20997	3.10954	3.06904	3.21733	3.61981		+	0.19013	1	2.44685	0.0177903	2
>tr|F1MX50|F1MX50_BOVIN Uncharacterized protein OS=Bos taurus GN=CREG1 PE=4 SV=1;>tr|Q148D9|Q148D9_BOVIN Cellular repressor of E1A-stimulated genes 1 OS=Bos taurus GN=CREG1 PE=2 SV=1	4	4	5.45335	4.82137	4.84628	5.41095	5.16915	5.25205	5.31357	5.19033	4.95867	5.18752	5.17155	5.40166	5.3915	5.87407	5.64076	5.62348	5.78571	5.49303	5.55195	5.68261		+	0.0201863	1	2.17787	0.0309837	2
>tr|E1BJP1|E1BJP1_BOVIN Uncharacterized protein OS=Bos taurus GN=Bt.13796 PE=3 SV=1;>tr|G3MZU3|G3MZU3_BOVIN Uncharacterized protein OS=Bos taurus GN=LOC783399 PE=4 SV=1	5	5	5.40245	4.74158	5.28477	5.58669	5.64582	4.35778	4.24514	4.51768	3.83812	4.45948	3.89	4.45849	4.51943	3.99459	4.01502	4.99152	5.647	5.19365	4.91776	5.41106		+	0.0197988	1	4.90071	0.000312819	2
>tr|A5D7Q2|A5D7Q2_BOVIN Putative uncharacterized protein OS=Bos taurus PE=2 SV=1	16	16	6.66131	6.30984	6.47117	6.67406	6.58703	6.71486	6.8141	6.68036	6.71422	6.67175	6.30948	6.51558	6.48749	6.65521	6.62027	6.49496	6.32568	6.16782	6.2801	6.4818		+	0.342443	1	2.52629	0.0155057	2
>sp|P60712|ACTB_BOVIN Actin, cytoplasmic 1 OS=Bos taurus GN=ACTB PE=1 SV=1;>tr|F1MRD0|F1MRD0_BOVIN Uncharacterized protein OS=Bos taurus GN=Bt.97896 PE=3 SV=2	13	1	5.98105	5.51779	5.69065	6.00741	5.80388	5.32767	5.19692	5.07251	5.08743	5.0794	4.95647	4.85027	5.2704	5.29072	5.11177	5.73007	5.4709	5.3137	5.13424	5.42562		+	0.0453795	1	4.15552	0.00120443	6
>sp|P21214|TGFB2_BOVIN Transforming growth factor beta-2 OS=Bos taurus GN=TGFB2 PE=1 SV=3	3	3	4.08113	3.18119	3.85698	3.87258	4.03479	3.997	4.13491	3.98597	4.3895	4.20925	NaN	NaN	3.43693	2.88669	3.69799	3.07059	3.70916	2.80423	3.14308	3.05208		+	0.0632771	1	2.91014	0.00781728	1
>sp|A6QPQ2|SPA38_BOVIN Serpin A3-8 OS=Bos taurus GN=SERPINA3-8 PE=2 SV=1;>tr|F1MXV6|F1MXV6_BOVIN Uncharacterized protein OS=Bos taurus GN=SERPINA3-8 PE=3 SV=1	5	2	4.325	3.32426	3.72721	3.51215	3.73972	3.68052	4.31027	4.18079	4.4374	3.60559	3.10462	NaN	3.36203	3.34368	3.02551	NaN	3.57412	3.21722	3.20058	3.28326		+	0.0252737	1	2.39896	0.0194324	2
>tr|F1MM86|F1MM86_BOVIN Uncharacterized protein OS=Bos taurus GN=C6 PE=4 SV=1;>sp|Q29RU4|CO6_BOVIN Complement component C6 OS=Bos taurus GN=C6 PE=2 SV=1	3	3	3.65685	2.98596	3.5758	3.72779	3.60994	3.60104	3.74062	3.61549	3.43683	3.62465	3.14167	3.05881	NaN	3.00108	3.04571	3.29141	3.28201	3.18299	3.06647	3.40668		+	0.035163	1	2.84054	0.00850995	2
>sp|P07224|PROS_BOVIN Vitamin K-dependent protein S OS=Bos taurus GN=PROS1 PE=1 SV=1	2	2	3.97324	3.66529	3.78447	4.08142	4.03201	4.07044	4.34721	4.30912	4.20836	4.66904	3.48949	3.3069	3.34559	4.00492	3.99478	NaN	3.73024	3.19995	3.20442	3.4928		+	0.473474	1	3.31037	0.00498262	1
>tr|E1BA17|E1BA17_BOVIN Uncharacterized protein OS=Bos taurus GN=Bt.56329 PE=4 SV=2	7	7	4.32463	4.08625	4.13628	4.38329	4.10796	4.09999	4.27233	3.83974	3.76027	4.2714	3.6658	3.5697	3.53358	3.71859	3.62887	2.92	3.41614	3.08081	3.17322	3.50935		+	0.0739134	1	5.90793	9.22995e-05	1
>sp|Q76LV2|HS90A_BOVIN Heat shock protein HSP 90-alpha OS=Bos taurus GN=HSP90AA1 PE=2 SV=3	4	2	4.27386	3.36543	3.71796	4.18221	4.06889	3.31681	NaN	3.50095	3.07181	2.98905	2.82268	NaN	NaN	2.94226	3.48149	3.80814	3.70161	3.65239	3.48816	3.57332		+	0.00493856	1	2.46491	0.0174534	1
>tr|Q9TS85|Q9TS85_BOVIN Histidine-rich GLYCOPROTEIN=FACTOR XIIIA substrate (Fragments) OS=Bos taurus PE=1 SV=1;>sp|P33433|HRG_BOVIN Histidine-rich glycoprotein (Fragments) OS=Bos taurus GN=HRG PE=1 SV=1	2	1	4.31635	4.35532	4.54733	4.5182	4.64774	3.79681	3.69298	4.09047	3.67289	3.82349	3.16014	3.40274	4.18324	3.96518	3.36814	NaN	3.9607	NaN	3.29697	3.66617		+	0.148695	1	2.88899	0.00781728	2
>tr|F1MIQ8|F1MIQ8_BOVIN Uncharacterized protein OS=Bos taurus GN=Bt.104475 PE=4 SV=1;>sp|P21809|PGS1_BOVIN Biglycan OS=Bos taurus GN=BGN PE=1 SV=3	5	5	4.77511	3.91218	4.21506	4.5852	4.72953	5.08675	5.1651	5.20634	5.07236	5.11664	3.59202	4.08668	4.41571	4.42447	4.47777	3.61611	4.14404	3.86012	NaN	3.708		+	0.145387	1	4.25142	0.00104627	2
>tr|Q2HJF0|Q2HJF0_BOVIN Serotransferrin-like OS=Bos taurus GN=LOC525947 PE=2 SV=1;>tr|E1BI82|E1BI82_BOVIN Uncharacterized protein OS=Bos taurus GN=Bt.52938 PE=4 SV=2;>tr|F1MSI4|F1MSI4_BOVIN Uncharacterized protein OS=Bos taurus GN=Bt.52938 PE=4 SV=1	12	10	4.02325	3.16551	3.87022	4.16873	3.83278	4.63987	4.96342	4.44314	4.08472	4.12869	2.89526	3.04191	3.0924	3.30944	3.36397	3.37891	5.16551	3.9182	4.39279	4.05327		+	0.0136195	1	2.88918	0.00781728	3
>tr|F1N3A1|F1N3A1_BOVIN Uncharacterized protein OS=Bos taurus GN=THBS1 PE=4 SV=1;>sp|Q28178|TSP1_BOVIN Thrombospondin-1 OS=Bos taurus GN=THBS1 PE=2 SV=2	18	18	5.05945	4.71446	5.05706	5.39113	5.01254	3.97471	4.27268	4.2408	3.88234	4.2061	3.31521	4.0327	3.84098	3.84957	4.30255	4.2711	3.98579	4.09999	4.17301	4.08322		+	0.021391	1	5.37019	0.000159687	3
>sp|P00745|PROC_BOVIN Vitamin K-dependent protein C (Fragment) OS=Bos taurus GN=PROC PE=1 SV=1	2	2	3.28803	2.64879	3.14613	3.95727	3.87471	4.60405	4.72608	4.53331	4.48721	4.68198	3.79801	3.4775	3.43498	4.17892	4.39622	3.44997	3.76937	3.56089	3.54806	4.23157		+	0.302747	1	3.04648	0.00628948	1
>tr|F1MVS9|F1MVS9_BOVIN Uncharacterized protein OS=Bos taurus GN=MASP1 PE=3 SV=1;>tr|Q08DW4|Q08DW4_BOVIN Mannan-binding lectin serine peptidase 1 (C4/C2 activating component of Ra-reactive factor) OS=Bos taurus GN=MASP1 PE=2 SV=1	3	3	3.92909	3.25205	3.59843	3.74906	3.73373	3.97926	4.14016	4.12401	3.7555	3.98065	3.57773	3.76588	3.63478	3.98392	3.94293	4.11568	4.19959	3.99957	4.16664	4.23613		+	0.00209704	1	2.6114	0.0133679	2
>sp|Q58CS8|GNPTG_BOVIN N-acetylglucosamine-1-phosphotransferase subunit gamma OS=Bos taurus GN=GNPTG PE=1 SV=4	3	3	4.02678	3.42444	3.65343	4.11524	3.90434	4.57939	4.56267	4.32685	4.26785	4.47191	4.2075	4.35547	4.22401	4.57531	4.35251	4.12215	4.15201	4.11143	4.10971	4.2396		+	0.0577534	1	3.62001	0.00282803	1
>sp|P80457|XDH_BOVIN Xanthine dehydrogenase/oxidase OS=Bos taurus GN=XDH PE=1 SV=4	87	4	4.75874	4.34374	4.7922	4.95015	4.60227	4.7632	4.85282	4.8043	4.30685	4.55642	4.72812	4.98189	4.98039	5.22871	5.21205	4.58956	3.41009	4.3017	4.66124	4.24684		+	0.156783	1	1.98446	0.0464318	1
>tr|F1MNT5|F1MNT5_BOVIN Uncharacterized protein OS=Bos taurus GN=MUC20 PE=4 SV=2	4	4	4.25969	3.64772	3.8084	4.18461	3.93265	4.00689	4.19948	3.98825	3.73218	3.81306	3.67326	3.73146	3.67143	3.75859	3.68417	4.32519	4.73505	4.29006	4.45303	4.33345		+	0.104739	1	3.95293	0.00178315	1
>tr|A0JND7|A0JND7_BOVIN ABO blood group (Transferase A, alpha 1-3-N-acetylgalactosaminyltransferase;transferase B, alpha 1-3-galactosyltransferase) OS=Bos taurus GN=ABO PE=2 SV=1;>tr|F1N6G4|F1N6G4_BOVIN Uncharacterized protein (Fragment) OS=Bos taurus GN=	3	3	4.12024	NaN	3.65907	3.77701	3.62936	NaN	NaN	NaN	NaN	NaN	NaN	NaN	NaN	NaN	NaN	4.38176	4.58162	4.30337	4.28747	4.41596		+	0.284865	1	2.89032	0.00781728	2
>tr|A4IFS7|A4IFS7_BOVIN CTSL1 protein OS=Bos taurus GN=CTSL1 PE=2 SV=1	4	4	4.58322	4.2606	4.38808	4.8184	4.40727	4.72395	4.74766	4.65772	4.85066	4.81379	4.02481	4.31264	4.23732	3.99832	4.62656	4.01999	3.88703	3.89992	3.93517	4.53784		+	0.181879	1	3.16169	0.00553574	1
>sp|P28800|A2AP_BOVIN Alpha-2-antiplasmin OS=Bos taurus GN=SERPINF2 PE=1 SV=2	4	4	4.67953	4.2577	4.62825	4.95864	4.72936	4.63953	4.88014	4.77774	4.84528	4.8454	4.27547	4.22329	4.35015	4.48983	4.46835	4.40432	4.6054	4.49538	4.31986	4.55716		+	0.302699	1	2.58763	0.0137838	1
>sp|P29392|SPAD1_BOVIN Spermadhesin-1 OS=Bos taurus GN=SPADH1 PE=1 SV=1	5	5	5.84787	4.19618	4.66651	4.96155	5.03953	5.67211	5.967	5.63063	5.80426	5.87451	5.4951	5.83481	5.89958	5.98575	5.92846	4.04501	4.72178	3.72238	4.02152	4.679		+	0.092112	1	4.75914	0.000390042	1
>sp|P10152|ANG1_BOVIN Angiogenin-1 OS=Bos taurus GN=ANG1 PE=1 SV=4;>tr|Q2NKV1|Q2NKV1_BOVIN Angiogenin, ribonuclease, RNase A family, 5 OS=Bos taurus GN=ANG PE=2 SV=1	3	3	4.97367	4.46433	5.00915	5.28526	5.59744	5.55428	5.46138	5.23982	4.96452	5.45874	4.51477	4.74427	4.1835	4.64246	4.69613	4.76888	5.53749	5.30606	5.39869	4.71068		+	0.042406	1	1.96782	0.0473002	2
>sp|P17690|APOH_BOVIN Beta-2-glycoprotein 1 OS=Bos taurus GN=APOH PE=1 SV=4	8	8	4.83918	4.32236	4.51427	4.77736	4.66808	5.28115	5.50942	5.31427	4.78435	5.05392	4.69456	4.70236	4.74769	4.96772	4.87599	4.875	5.0943	4.88836	4.76606	4.92681		+	0.00117831	1	2.6308	0.0131035	1
>tr|A6QPK0|A6QPK0_BOVIN SCGB2A2 protein OS=Bos taurus GN=SCGB2A2 PE=4 SV=1	3	3	4.68772	4.3115	4.84303	4.7011	4.63939	4.33864	4.70014	4.83625	4.64792	4.61458	5.23825	5.34786	5.43718	5.50143	5.52956	4.62427	4.71451	5.11727	4.70159	4.95544		+	0.107965	1	5.08476	0.000244993	1
>sp|A2I7N1|SPA35_BOVIN Serpin A3-5 OS=Bos taurus GN=SERPINA3-5 PE=3 SV=1	11	1	5.18631	4.445	4.58557	5.52214	4.95843	5.08214	5.94019	5.20836	5.88553	5.57849	4.77324	4.50815	4.53365	4.96184	4.98326	5.0498	5.0766	4.82111	4.86768	5.00056		+	0.392822	1	2.12319	0.0344243	2
>tr|F1MLW8|F1MLW8_BOVIN Uncharacterized protein OS=Bos taurus GN=LOC616727 PE=4 SV=2	8	4	5.70725	5.33357	5.59088	6.04677	5.77383	5.44408	5.68977	5.6722	5.37834	5.48332	5.07595	5.20377	5.14445	5.38664	5.29789	5.25667	5.18267	5.33848	5.25181	5.31124		+	0.132314	1	3.06793	0.00628948	1
>sp|P61823|RNAS1_BOVIN Ribonuclease pancreatic OS=Bos taurus GN=RNASE1 PE=1 SV=1	6	6	6.08579	5.29066	5.70045	6.27286	6.08117	5.58712	5.67388	5.30946	4.877	5.50759	4.68831	4.61354	4.88804	5.18281	4.90657	5.04036	5.00247	5.13586	5.06119	5.35881		+	0.0402059	1	3.62899	0.00282803	3
>tr|B1H0W7|B1H0W7_BOVIN Prostaglandin D2 synthase 21kDa (Brain) OS=Bos taurus GN=PTGDS PE=2 SV=1;>sp|O02853|PTGDS_BOVIN Prostaglandin-H2 D-isomerase OS=Bos taurus GN=PTGDS PE=1 SV=1	9	9	6.85335	6.21352	6.4263	6.67584	6.49937	4.61604	4.85208	4.75416	4.58309	4.30073	4.96445	5.51928	5.47328	5.02816	5.35241	4.40705	5.54989	4.8679	4.75577	5.42236		+	0.00351054	1	6.50635	3.4903e-05	2
>tr|Q0IIA2|Q0IIA2_BOVIN Odorant-binding protein-like OS=Bos taurus GN=MGC151921 PE=2 SV=1	7	6	4.65805	4.13884	5.01745	4.72501	4.7613	5.57118	5.8326	5.88863	5.74117	5.97249	5.92684	6.37372	6.54315	6.47592	6.60735	5.66082	6.22453	5.84657	5.95503	6.21875		+	0.0123192	1	7.09409	1.80367e-05	1
>tr|B6VAP8|B6VAP8_BOVIN RAGE-binding protein OS=Bos taurus PE=4 SV=1;>sp|P79105|S10AC_BOVIN Protein S100-A12 OS=Bos taurus GN=S100A12 PE=1 SV=3;>tr|G3N2H5|G3N2H5_BOVIN Uncharacterized protein (Fragment) OS=Bos taurus GN=P79105 PE=4 SV=1	2	2	4.78279	4.75798	4.96241	5.04794	4.92042	3.73574	3.61406	NaN	3.597	3.91009	NaN	NaN	3.67022	NaN	3.77821	NaN	4.02894	NaN	3.6027	NaN		+	0.00086321	1	5.42159	0.000159687	3
>sp|P22226|CTHL1_BOVIN Cathelicidin-1 OS=Bos taurus GN=CATHL1 PE=1 SV=2	2	2	4.91555	4.31666	4.70874	5.02094	4.52755	4.14903	3.76363	3.96113	4.22771	3.82329	NaN	3.52466	3.76278	3.77814	3.7724	3.66773	4.15933	3.43201	NaN	NaN		+	0.0911349	1	3.80333	0.00220193	1
>tr|A7E3T8|A7E3T8_BOVIN ATP-binding cassette, sub-family G, member 2 OS=Bos taurus GN=ABCG2 PE=2 SV=1;>tr|B2D1N9|B2D1N9_BOVIN Breast cancer resistance protein OS=Bos taurus GN=ABCG2 PE=2 SV=1;>tr|Q32PJ1|Q32PJ1_BOVIN ATP-binding cassette, sub-family G (WHIT	12	12	5.77333	4.25607	4.19184	5.46976	2.90147	NaN	2.811	4.46241	NaN	NaN	NaN	4.01662	NaN	3.78204	5.32071	5.66945	2.81766	NaN	4.6089	4.54531			0.700583	1	0.0910971	0.885925	4
>tr|F1N2D9|F1N2D9_BOVIN Uncharacterized protein OS=Bos taurus PE=4 SV=1;>tr|F1N647|F1N647_BOVIN Uncharacterized protein OS=Bos taurus GN=Bt.101400 PE=4 SV=2;>sp|Q71SP7|FAS_BOVIN Fatty acid synthase OS=Bos taurus GN=FASN PE=2 SV=1;>tr|E1B9X3|E1B9X3_BOVIN Un	21	21	4.98087	4.1547	4.06138	4.71271	3.75526	3.85671	4.53306	3.45559	2.58843	2.19678	3.1117	3.3429	3.10078	NaN	4.32195	4.41905	2.01691	1.78983	3.77631	3.62179			0.121167	1	0.777521	0.318504	4
>tr|F1MD77|F1MD77_BOVIN Uncharacterized protein OS=Bos taurus GN=LAMC1 PE=4 SV=2	11	11	3.50726	3.49275	3.65276	3.53484	3.72419	3.6163	3.87393	3.88717	3.25897	3.90208	3.30993	3.43205	3.52985	3.2785	3.85402	3.64291	3.8581	3.53822	3.8789	3.94981			1.33722	1	0.805653	0.307793	1
>sp|P0CH28|UBC_BOVIN Polyubiquitin-C OS=Bos taurus GN=UBC PE=1 SV=1;>tr|E1B9K1|E1B9K1_BOVIN Uncharacterized protein OS=Bos taurus GN=Bt.106367 PE=4 SV=2;>sp|P0CG53|UBB_BOVIN Polyubiquitin-B OS=Bos taurus GN=UBB PE=1 SV=1;>sp|P62992|RS27A_BOVIN Ubiquitin-40	2	1	4.92253	3.2223	3.51536	4.08945	3.37221	3.62059	3.66826	3.85919	3.28183	2.88304	3.10291	3.3362	3.45356	4.0269	4.08824	4.11621	3.72868	3.47524	3.68154	3.58465			0.198875	1	0.182386	0.779154	5
>sp|P80025|PERL_BOVIN Lactoperoxidase OS=Bos taurus GN=LPO PE=1 SV=1;>tr|G3MXZ0|G3MXZ0_BOVIN Uncharacterized protein (Fragment) OS=Bos taurus GN=LPO PE=4 SV=1	46	46	7.05637	6.33866	6.39545	6.83378	6.62885	6.40081	6.51805	6.45498	6.37544	6.488	6.27251	6.34425	6.35349	6.598	6.39018	6.12911	6.41223	6.30961	6.32193	6.48171			0.138231	1	1.22644	0.161967	2
>sp|P63103|1433Z_BOVIN 14-3-3 protein zeta/delta OS=Bos taurus GN=YWHAZ PE=1 SV=1	5	4	4.58409	3.59483	4.22207	4.52431	4.11601	3.51597	3.57926	3.77089	3.21961	3.50907	3.57043	2.69305	3.41872	3.8503	4.12649	4.51327	3.74642	3.84072	3.69622	4.23439			0.336046	1	1.53996	0.0977886	2
>tr|E1BMJ0|E1BMJ0_BOVIN Uncharacterized protein OS=Bos taurus GN=SERPING1 PE=3 SV=2;>sp|P50448|F12AI_BOVIN Factor XIIa inhibitor OS=Bos taurus PE=1 SV=1	9	9	6.26404	4.80498	5.19992	5.82242	5.50111	5.31444	5.64601	5.3845	5.02894	5.54862	5.2354	5.3522	5.38933	5.66422	5.54224	5.59035	5.8428	5.47492	5.34766	5.62385			0.0522611	1	0.0960982	0.880075	2
>tr|E1BKT9|E1BKT9_BOVIN Uncharacterized protein OS=Bos taurus GN=DSP PE=4 SV=1	13	13	3.85137	2.99269	3.21535	3.57227	3.63454	2.95798	3.43334	3.17687	3.67169	3.63648	3.85176	3.0525	3.36021	4.36229	3.53392	3.93802	3.60785	3.29201	2.9877	3.59022			0.986388	1	0.118713	0.847888	1
>sp|Q29443|TRFE_BOVIN Serotransferrin OS=Bos taurus GN=TF PE=2 SV=1	69	5	6.38351	6.26656	6.59647	6.70052	6.84803	6.53084	6.53674	6.33212	5.38254	6.24993	6.07682	6.15537	6.38694	6.42583	5.97002	6.12136	6.64716	6.39693	6.28441	6.51652			0.0536431	1	0.64246	0.398637	1
>sp|Q95M12|LGMN_BOVIN Legumain OS=Bos taurus GN=LGMN PE=1 SV=1	4	4	4.41046	4.08486	4.17629	4.45312	4.23104	4.109	4.18839	4.01431	3.95373	4.31654	3.8583	4.07708	4.05736	4.16447	3.89427	4.20887	4.17806	3.78036	4.07802	4.17374			0.128043	1	1.05399	0.206057	1
>tr|G3X7A5|G3X7A5_BOVIN Uncharacterized protein OS=Bos taurus GN=Bt.19562 PE=4 SV=1;>sp|Q2UVX4|CO3_BOVIN Complement C3 OS=Bos taurus GN=C3 PE=1 SV=2	121	121	6.77525	6.02837	6.3223	6.56516	6.45163	6.38482	6.59661	6.53867	6.38001	6.46762	5.9149	6.07998	6.15634	6.37012	6.22173	6.21431	6.29983	6.12662	6.05292	6.29996			0.0672747	1	1.63033	0.0838459	6
>sp|P41361|ANT3_BOVIN Antithrombin-III OS=Bos taurus GN=SERPINC1 PE=1 SV=2	16	1	5.75111	5.11481	5.44779	5.65184	5.53226	5.55461	5.67141	5.76714	5.56142	5.8988	5.40024	5.35985	5.54082	5.71667	5.65256	5.53111	5.57594	5.41795	5.61414	5.68015			0.424841	1	0.473325	0.490686	1
>sp|P18892|BT1A1_BOVIN Butyrophilin subfamily 1 member A1 OS=Bos taurus GN=BTN1A1 PE=1 SV=2;>tr|F1MZQ4|F1MZQ4_BOVIN Uncharacterized protein (Fragment) OS=Bos taurus GN=BTN1A1 PE=4 SV=2;>tr|E1BHI7|E1BHI7_BOVIN Uncharacterized protein OS=Bos taurus GN=BTN1A1	27	27	7.05888	5.83547	5.83391	6.58248	5.46827	5.31794	5.52246	5.82874	5.23482	5.44596	5.35491	5.62621	5.64054	5.80677	6.3095	6.59149	5.62208	5.25423	5.90481	6.02698			0.106746	1	0.780697	0.318504	6
>sp|P50397|GDIB_BOVIN Rab GDP dissociation inhibitor beta OS=Bos taurus GN=GDI2 PE=2 SV=3	7	5	4.9993	4.24309	4.37577	4.87319	4.32385	4.59279	4.73081	4.56335	4.16687	4.47864	4.30451	4.24015	4.45133	4.42485	4.64748	4.59795	4.53274	4.40512	4.45629	4.58003			0.0893819	1	0.121108	0.847442	1
>sp|P34955|A1AT_BOVIN Alpha-1-antiproteinase OS=Bos taurus GN=SERPINA1 PE=1 SV=1	22	22	6.18027	5.50405	5.81277	6.19176	5.98998	5.84848	6.10816	5.92402	5.92123	6.03491	5.61403	5.73136	5.88031	5.91906	5.87224	5.73	5.99967	5.74816	5.77588	5.87568			0.179778	1	0.407635	0.528124	1
>sp|A1L595|K1C17_BOVIN Keratin, type I cytoskeletal 17 OS=Bos taurus GN=KRT17 PE=2 SV=1	22	3	4.10391	3.14348	3.45588	3.4009	3.57625	3.29442	3.401	3.10264	3.93076	4.126	4.20815	3.46255	3.50788	4.33019	4.02473	5.1384	4.02457	3.15655	3.88329	4.06759			0.892285	1	0.518554	0.46488	5
>sp|Q8WML4|MUC1_BOVIN Mucin-1 OS=Bos taurus GN=MUC1 PE=1 SV=1;>tr|Q28078|Q28078_BOVIN Epithelial mucin (Fragment) OS=Bos taurus GN=MUC1 PE=4 SV=1	4	4	5.60618	4.86228	4.592	5.3618	3.42088	3.31296	3.36054	4.22518	3.38021	3.03214	3.35147	NaN	NaN	4.04579	5.50756	5.56307	3.70751	NaN	4.11514	4.40473			0.0151034	1	0.970013	0.237637	2
>tr|F1MAV0|F1MAV0_BOVIN Uncharacterized protein OS=Bos taurus GN=FGB PE=4 SV=2;>sp|P02676|FIBB_BOVIN Fibrinogen beta chain OS=Bos taurus GN=FGB PE=1 SV=2;>tr|A6QPX7|A6QPX7_BOVIN FGB protein (Fragment) OS=Bos taurus GN=FGB PE=2 SV=1	19	19	5.39585	4.69326	5.08792	5.49507	5.29108	5.0983	5.40541	5.20197	5.17222	5.03076	4.69378	4.8472	4.78772	5.17883	5.12966	5.30216	5.02559	5.0596	5.09653	5.13424			0.229417	1	0.682319	0.372408	3
>tr|A6H7J6|A6H7J6_BOVIN P4HB protein OS=Bos taurus GN=P4HB PE=2 SV=1;>sp|P05307|PDIA1_BOVIN Protein disulfide-isomerase OS=Bos taurus GN=P4HB PE=1 SV=1	9	9	4.9787	4.18591	4.45725	4.76683	4.69991	4.76048	4.69616	4.70899	4.43913	4.79802	4.45211	4.38696	4.58573	4.73861	4.50099	4.56747	4.91822	4.7139	4.77705	4.82861			0.0420284	1	0.491602	0.48188	2
>sp|P04272|ANXA2_BOVIN Annexin A2 OS=Bos taurus GN=ANXA2 PE=1 SV=2	5	5	4.35139	3.52691	3.1959	4.37577	3.63011	NaN	NaN	3.50733	NaN	NaN	3.813	3.07744	3.47309	3.87153	4.19226	4.43037	3.51304	3.17129	3.44847	3.63383			1.95574	1	0.0791233	0.895579	1
>sp|Q32KV6|SIL1_BOVIN Nucleotide exchange factor SIL1 OS=Bos taurus GN=SIL1 PE=2 SV=1	13	13	5.67608	5.25174	5.06074	5.59545	5.53747	5.45574	5.5664	5.39032	5.22976	5.54321	5.20123	5.14662	4.99778	5.30891	5.44798	5.27674	5.48837	5.22246	5.39106	5.47654			0.683276	1	0.615706	0.417444	1
>tr|F1N4M7|F1N4M7_BOVIN Uncharacterized protein OS=Bos taurus GN=Bt.64790 PE=3 SV=2;>tr|Q32PI4|Q32PI4_BOVIN Complement factor I OS=Bos taurus GN=CFI PE=2 SV=1	4	4	4.60068	3.67644	4.23495	4.77746	4.59441	4.21232	4.51148	4.30625	3.99874	4.54017	3.92368	3.93641	4.05173	4.18761	4.31929	4.22686	4.44878	4.18682	4.11234	4.2724			0.208251	1	0.426112	0.518471	2
>tr|A1L555|A1L555_BOVIN Prosaposin OS=Bos taurus GN=PSAP PE=2 SV=1	13	1	5.8408	5.32554	5.45391	5.7019	5.60204	5.2935	5.42093	5.272	5.39941	5.41295	5.20952	5.48413	5.54656	5.66523	5.48688	5.43616	5.37275	5.47425	5.24339	5.62333			0.190308	1	0.775251	0.318504	1
>sp|Q28085|CFAH_BOVIN Complement factor H OS=Bos taurus GN=CFH PE=1 SV=3	9	2	4.02747	3.45219	3.81233	4.3133	4.22807	3.7749	3.76711	3.887	3.55291	3.79818	3.32278	2.9605	3.51234	3.86646	3.85838	3.44587	3.73932	3.69954	3.46932	3.67594			0.564183	1	1.08989	0.195828	1
>tr|F6KLJ6|F6KLJ6_ARAHY Annexin OS=Arachis hypogaea var. vulgaris PE=2 SV=1	14	14	5.50613	3.98596	NaN	5.55662	5.37495	5.51171	5.7793	5.40357	5.65565	5.51272	5.75594	5.12668	5.34106	5.74761	5.66666	5.44564	5.55808	5.43723	5.42885	5.85407			0.327474	1	0.551655	0.449007	1
>sp|P01045|KNG2_BOVIN Kininogen-2 OS=Bos taurus GN=KNG2 PE=1 SV=1	12	5	4.87616	4.26095	4.84981	4.96471	4.98689	5.22029	5.19114	5.17047	5.07295	5.32257	4.6734	5.01937	4.86423	5.19468	5.02621	5.17249	5.3801	4.90588	5.04175	5.27568			0.0336123	1	1.6297	0.0838459	1
>tr|F1MXX6|F1MXX6_BOVIN Uncharacterized protein OS=Bos taurus GN=MFGE8 PE=4 SV=1;>sp|Q95114|MFGM_BOVIN Lactadherin OS=Bos taurus GN=MFGE8 PE=1 SV=2;>tr|Q3T0K7|Q3T0K7_BOVIN MFGE8 protein OS=Bos taurus GN=MFGE8 PE=2 SV=1;>tr|G3MYW7|G3MYW7_BOVIN Uncharacteriz	24	24	7.18375	5.86099	6.03818	6.80735	5.70616	5.57541	5.68162	6.05108	5.03515	5.43559	5.07008	5.33951	5.17085	6.23401	6.60391	6.5036	5.72656	5.21906	5.8486	6.11237			0.0863455	1	0.719503	0.347408	4
>sp|Q3T000|YKT6_BOVIN Synaptobrevin homolog YKT6 OS=Bos taurus GN=YKT6 PE=2 SV=1	3	3	4.95873	4.48055	4.44868	4.69954	4.33435	4.62772	4.74347	3.55783	4.41744	3.85611	4.05786	NaN	NaN	NaN	4.97684	4.37849	5.09531	4.00458	4.16277	5.10884			0.523744	1	0.188333	0.776378	1
>tr|G1K122|G1K122_BOVIN Uncharacterized protein OS=Bos taurus GN=RBP4 PE=4 SV=1;>sp|P18902|RET4_BOVIN Retinol-binding protein 4 OS=Bos taurus GN=RBP4 PE=1 SV=1;>tr|Q32L14|Q32L14_BOVIN RBP4 protein OS=Bos taurus GN=RBP4 PE=2 SV=1	3	3	5.40809	4.94308	5.3803	5.59458	5.19868	5.41679	4.60249	5.29208	NaN	5.36433	4.92372	5.3567	5.2546	5.34665	5.38539	5.15996	5.32141	5.15039	5.24603	5.59526			0.473919	1	0.0686054	0.902208	3
>sp|Q0P569|NUCB1_BOVIN Nucleobindin-1 OS=Bos taurus GN=NUCB1 PE=2 SV=1	47	46	7.15036	6.03367	6.3411	6.65541	6.55641	6.73402	6.81645	6.53855	6.53656	6.77573	6.4206	6.64408	6.64104	6.91908	6.61522	6.83483	6.90805	6.8841	6.66677	6.8917			0.0635365	1	0.491218	0.48188	1
>tr|F1MBN5|F1MBN5_BOVIN Uncharacterized protein OS=Bos taurus PE=4 SV=1;>sp|P02702|FOLR1_BOVIN Folate receptor alpha OS=Bos taurus GN=FOLR1 PE=1 SV=2	6	5	5.57748	5.09774	5.45324	5.52237	5.48296	5.24249	5.24135	5.19797	5.30597	5.08718	5.17658	5.69682	5.18994	5.4674	5.33726	5.41248	5.76227	5.01549	5.49287	5.37037			0.230317	1	0.450892	0.501994	3
>sp|P10790|FABPH_BOVIN Fatty acid-binding protein, heart OS=Bos taurus GN=FABP3 PE=1 SV=2;>tr|C0LSL0|C0LSL0_BOVIN Heart fatty acid-binding protein OS=Bos taurus GN=H-FABP PE=2 SV=1;>tr|Q58DW1|Q58DW1_BOVIN Fatty acid binding protein 3 OS=Bos taurus GN=FABP3	19	18	7.37645	6.33116	6.51036	7.05158	6.68863	6.94741	6.99107	6.75303	6.60403	6.75681	6.59751	6.6026	6.56085	6.82365	6.92134	6.96284	6.95997	6.71591	6.84861	7.00035			0.37907	1	0.177359	0.783674	5
>sp|P81265|PIGR_BOVIN Polymeric immunoglobulin receptor OS=Bos taurus GN=PIGR PE=2 SV=1;>tr|A6QNW3|A6QNW3_BOVIN PIGR protein OS=Bos taurus GN=PIGR PE=2 SV=1	54	9	7.52967	6.68222	6.97621	7.288	7.02833	6.95059	6.92145	7.01127	6.75952	6.97922	6.64641	6.94894	7.02473	7.14653	6.9611	6.84295	6.9084	6.91793	6.7072	7.0493			0.0864959	1	0.422154	0.518471	2
>tr|F1MB08|F1MB08_BOVIN Enolase OS=Bos taurus GN=ENO1 PE=3 SV=1;>sp|Q9XSJ4|ENOA_BOVIN Alpha-enolase OS=Bos taurus GN=ENO1 PE=1 SV=4	6	6	4.76716	3.75373	4.27907	4.4978	4.45343	4.48141	3.61844	3.3073	4.18024	3.99634	3.79514	3.07207	3.7512	4.11608	4.0304	4.61258	4.5333	4.19576	4.19184	4.55694			0.609981	1	1.48153	0.107659	5
>sp|P19120|HSP7C_BOVIN Heat shock cognate 71 kDa protein OS=Bos taurus GN=HSPA8 PE=1 SV=2;>tr|A7E3Q2|A7E3Q2_BOVIN Heat shock 70kDa protein 1A OS=Bos taurus GN=HSPA2 PE=2 SV=1;>sp|P34933|HSP72_BOVIN Heat shock-related 70 kDa protein 2 OS=Bos taurus GN=HSPA2	8	5	5.16826	4.23739	4.34805	4.83869	4.67042	4.70014	4.41046	4.35925	4.49661	4.28892	4.6222	4.4019	4.34157	4.7178	4.59129	4.94019	4.57051	4.19794	4.40302	4.63764			2.26552	1	0.166854	0.786774	6
>sp|P79345|NPC2_BOVIN Epididymal secretory protein E1 OS=Bos taurus GN=NPC2 PE=1 SV=1	9	9	6.78505	6.20895	6.49886	6.80661	6.5719	6.54164	6.61267	6.39356	6.23779	6.6083	6.28767	6.49454	6.48014	6.60933	6.59619	6.51959	6.5536	6.2655	6.44965	6.67743			0.163676	1	0.0842366	0.893358	1
>tr|F1MW68|F1MW68_BOVIN Uncharacterized protein OS=Bos taurus GN=CTSZ PE=3 SV=1;>sp|P05689|CATZ_BOVIN Cathepsin Z OS=Bos taurus GN=CTSZ PE=2 SV=2	6	6	5.42919	4.68592	4.91138	5.21685	5.08899	4.8395	4.84668	4.83916	4.83505	4.75766	4.82798	4.9196	4.97545	5.08243	4.91006	5.03906	5.04731	5.06382	4.94879	4.91395			0.15289	1	0.907816	0.268903	2
>sp|P80195|GLCM1_BOVIN Glycosylation-dependent cell adhesion molecule 1 OS=Bos taurus GN=GLYCAM1 PE=1 SV=2	18	18	8.02963	7.06848	7.33306	7.5664	7.5525	7.58813	7.75294	7.60293	7.30567	7.66409	6.97984	7.30417	7.34437	7.53087	7.47371	7.40092	7.94691	7.59212	7.6681	7.80181			0.00290811	1	0.750561	0.331704	3
>tr|F1N6D4|F1N6D4_BOVIN Uncharacterized protein OS=Bos taurus GN=SLC34A2 PE=4 SV=1;>sp|Q27960|NPT2B_BOVIN Sodium-dependent phosphate transport protein 2B OS=Bos taurus GN=SLC34A2 PE=1 SV=1	12	12	6.22575	5.30207	5.27681	6.19243	5.19965	4.96094	3.9855	5.20914	4.5889	4.86247	4.93009	3.54259	3.67634	4.35238	5.72403	6.03189	4.75775	4.97668	5.16699	5.45271			0.508092	1	1.47935	0.107659	2
>sp|P02666|CASB_BOVIN Beta-casein OS=Bos taurus GN=CSN2 PE=1 SV=2	13	13	7.2806	6.97974	7.09276	6.95393	7.1608	6.6773	6.64668	6.72218	6.64087	6.71361	6.9062	6.77173	6.7185	7.06446	7.52408	6.82812	7.09774	6.62363	7.15673	6.808			0.26105	1	1.44109	0.11474	1
>tr|Q0IIH5|Q0IIH5_BOVIN Nucleobindin 2 OS=Bos taurus GN=NUCB2 PE=2 SV=1	22	21	6.18041	5.37341	5.52164	5.8688	5.7436	5.63349	5.86069	5.77303	5.52238	5.77333	5.56152	5.60553	5.65472	5.77064	5.67303	5.72379	6.24512	5.81428	5.90416	5.9356			0.00606945	1	0.685879	0.372347	2
>sp|Q7SIH1|A2MG_BOVIN Alpha-2-macroglobulin OS=Bos taurus GN=A2M PE=1 SV=2;>tr|E1BJW0|E1BJW0_BOVIN Uncharacterized protein OS=Bos taurus GN=Bt.60794 PE=4 SV=1	9	9	4.05304	4.07346	3.84518	4.35727	4.13833	3.70597	4.17921	4.22755	3.88014	4.05873	4.28024	3.6376	4.03266	4.44253	4.24635	4.50087	3.62128	3.58278	4.11929	4.32611			0.382667	1	0.0390972	0.940953	2
>tr|Q9BDG3|Q9BDG3_BOVIN Beta lactoglobulin D (Fragment) OS=Bos taurus GN=bLG D PE=4 SV=1	5	1	7.06393	6.88032	7.52937	4.87833	6.24983	6.70666	7.57085	6.82105	6.86063	5.96737	6.41657	8.04673	5.87633	6.18608	5.6076	6.39749	6.28769	8.45901	7.84512	6.20852			0.864693	1	0.143449	0.808996	1
>tr|F1MK90|F1MK90_BOVIN Uncharacterized protein OS=Bos taurus GN=DNAJC1 PE=4 SV=2;>tr|F1MJX8|F1MJX8_BOVIN Uncharacterized protein OS=Bos taurus GN=DNAJC1 PE=4 SV=2	2	2	7.18526	5.11654	5.86036	5.37181	6.37803	3.36451	6.89265	3.5803	3.82189	4.37431	6.39704	6.29495	6.23495	6.61538	6.57082	5.21833	6.67946	6.59383	NaN	5.50068			0.0522856	1	1.73953	0.0715886	2
>sp|P02663|CASA2_BOVIN Alpha-S2-casein OS=Bos taurus GN=CSN1S2 PE=1 SV=2	20	20	7.06752	6.74831	6.90042	6.90326	7.13347	6.54449	6.57215	6.46645	6.48688	6.64862	6.76339	6.5846	6.52596	6.82809	6.99084	6.99933	6.93135	6.54389	6.47015	7.01301			0.426986	1	1.65815	0.0834145	1
>sp|Q148H7|K2C79_BOVIN Keratin, type II cytoskeletal 79 OS=Bos taurus GN=KRT79 PE=2 SV=1	10	2	5.37856	5.21251	4.85024	5.56961	5.11384	5.19554	5.21088	5.20019	5.41353	5.58894	5.72881	5.25203	5.31321	5.68656	5.2353	6.08771	5.0667	5.21804	5.0498	5.42912			1.13378	1	0.155061	0.802831	1
>tr|F1MUT3|F1MUT3_BOVIN Uncharacterized protein OS=Bos taurus GN=XDH PE=4 SV=1	88	5	7.07893	6.00441	6.38216	6.67642	6.38824	6.51359	6.63648	6.62827	6.27889	6.36433	6.2349	6.45565	6.4721	6.73469	6.7154	6.97424	6.62014	6.68787	6.62469	6.81207			0.143973	1	0.451115	0.501994	8
>tr|Q3ZCG6|Q3ZCG6_BOVIN FKBP1A protein (Fragment) OS=Bos taurus GN=FKBP1A PE=2 SV=1;>sp|P18203|FKB1A_BOVIN Peptidyl-prolyl cis-trans isomerase FKBP1A OS=Bos taurus GN=FKBP1A PE=1 SV=2;>tr|Q2NKS8|Q2NKS8_BOVIN FK506 binding protein 1A, 12kDa-like OS=Bos taur	2	2	5.31591	4.46681	4.72085	5.54496	4.86828	5.04871	4.88508	5.00826	4.56441	4.87502	4.37434	4.33546	4.29363	4.63711	4.90121	5.01481	4.74695	4.2594	4.36696	4.71933			0.325815	1	1.00858	0.219616	3
>tr|B5B0D4|B5B0D4_BOVIN Major allergen beta-lactoglobulin OS=Bos taurus PE=2 SV=1	31	6	8.20118	7.6238	7.80149	7.48065	7.50947	7.58305	7.75191	7.61743	7.57036	7.89804	7.3459	7.79017	7.88402	8.23345	7.82951	8.02894	7.93087	7.77956	7.57375	7.94142			0.000143285	1	0.166596	0.786774	2
>tr|E9LFE8|E9LFE8_ARAHY 11S arachin (Fragment) OS=Arachis hypogaea PE=2 SV=1	11	8	3.19568	NaN	3.76309	3.94616	NaN	NaN	NaN	NaN	3.94378	NaN	NaN	NaN	NaN	NaN	NaN	NaN	3.44063	NaN	NaN	NaN			0	1	0	1	1
>tr|Q28049|Q28049_BOVIN Alpha lactalbumin (Fragment) OS=Bos taurus GN=alfaLA PE=3 SV=1	18	2	9.07558	7.7353	8.07602	8.75744	8.39373	8.52399	8.49654	8.34616	8.40023	8.29192	8.24927	8.37203	8.1903	8.70548	8.27365	8.64304	8.89071	8.70929	8.52993	8.62654			0.268036	1	0.469112	0.490686	1
>sp|P02662|CASA1_BOVIN Alpha-S1-casein OS=Bos taurus GN=CSN1S1 PE=1 SV=2;>tr|B5B3R8|B5B3R8_BOVIN Alpha S1 casein OS=Bos taurus GN=CSN1S1 PE=2 SV=1	21	21	8.16735	7.86649	7.82076	7.80737	8.01916	7.40572	7.6696	7.53063	7.4942	7.496	7.99443	7.16917	7.18673	7.78158	8.00668	7.95699	7.72821	7.60874	7.48009	7.89922			0.363942	1	1.03122	0.210566	3
>tr|Q9TRB9|Q9TRB9_BOVIN Enterotoxin-binding glycoprotein PP20K (Fragment) OS=Bos taurus PE=1 SV=1	3	3	9.18147	8.21205	8.64845	9.31054	8.54002	8.59911	8.28233	8.42557	8.77842	8.66018	8.98868	8.84485	9.06006	8.90707	8.6021	8.92662	8.89303	8.62016	8.38088	9.109			0.746113	1	0.421805	0.518471	1
>sp|P02754|LACB_BOVIN Beta-lactoglobulin OS=Bos taurus GN=LGB PE=1 SV=3	32	5	9.19651	8.59408	8.65655	9.0758	8.75371	8.75117	9.03511	8.78596	8.75424	8.91191	8.61805	8.70988	8.91155	8.92361	8.84574	8.94637	8.94245	8.81729	8.79431	8.83242			0.0485229	1	0.0319303	0.950328	2
>tr|Q5I6T2|Q5I6T2_ARAHY Arachin Ahy-4 OS=Arachis hypogaea PE=2 SV=1	41	4	2.83426	NaN	3.6557	3.05588	3.47659	NaN	3.30933	3.46623	2.97311	NaN	3.42367	NaN	3.1677	NaN	3.44966	3.0864	2.97353	3.51617	2.77721	NaN			0.880064	1	0.146989	0.80648	1
>tr|B4XID4|B4XID4_ARAHY Ara h 7 allergen OS=Arachis hypogaea PE=2 SV=1	18	10	NaN	6.08597	6.07434	6.07048	6.31652	5.70248	NaN	5.83206	5.8336	5.84541	6.14965	6.05698	5.94575	5.99937	NaN	NaN	5.73418	5.78248	5.78311	6.17228			0.0472348	1	1.88333	0.0552891	1
>tr|B3IXL2|B3IXL2_ARAHY Main allergen Ara h1 OS=Arachis hypogaea PE=2 SV=1;>sp|P43237|ALL11_ARAHY Allergen Ara h 1, clone P17 OS=Arachis hypogaea PE=1 SV=1;>tr|Q6PSU3|Q6PSU3_ARAHY Conarachin (Fragment) OS=Arachis hypogaea PE=4 SV=1;>tr|Q6PSU6|Q6PSU6_ARAHY	73	20	4.2058	NaN	3.53398	4.03242	3.82296	3.694	3.79348	3.42625	3.89062	4.09374	2.82306	3.86159	3.43892	3.32881	3.36504	3.57895	3.85982	3.62463	3.83341	3.78417			0.143281	1	1.35091	0.131377	5
>tr|Q647H3|Q647H3_ARAHY Arachin Ahy-2 OS=Arachis hypogaea PE=2 SV=1	47	4	NaN	NaN	2.38249	3.72478	3.25139	2.91369	3.54887	3.03751	3.31507	3.13548	3.62821	3.11813	3.15119	3.22285	3.51445	3.62997	3.72311	3.46025	3.58654	3.29279			0.341066	1	0.538662	0.455846	1
>sp|Q6PSU2|CONG7_ARAHY Conglutin-7 OS=Arachis hypogaea PE=1 SV=2	21	21	5.58487	3.91547	3.70893	4.79064	5.15063	5.03731	3.91018	4.41699	3.35574	5.12772	4.92366	5.27811	4.80346	5.36964	5.41825	5.44314	5.36023	5.30718	3.38292	5.50936			0.399571	1	0.470881	0.490686	1
>tr|A1DZF0|A1DZF0_ARAHY Arachin 6 OS=Arachis hypogaea PE=2 SV=1;>tr|Q9SQH7|Q9SQH7_ARAHY Glycinin OS=Arachis hypogaea GN=Arah4 PE=2 SV=1	53	13	4.73719	3.85841	4.3678	3.59374	4.12937	3.82591	4.7343	3.7854	3.26432	4.39886	4.25443	4.7698	4.5642	4.81631	3.78581	4.73896	4.93482	4.25734	4.37271	3.87931			0.342635	1	0.42068	0.518471	2
>tr|A5PJE3|A5PJE3_BOVIN Fibrinogen alpha chain OS=Bos taurus GN=FGA PE=2 SV=1;>sp|P02672|FIBA_BOVIN Fibrinogen alpha chain OS=Bos taurus GN=FGA PE=1 SV=5	18	18	5.3357	4.91989	5.31846	5.56772	5.25273	5.07617	5.62184	5.18679	5.68902	5.17589	5.05135	5.13226	4.86708	5.23426	5.20466	5.55387	5.27105	5.43391	5.42352	5.55733			0.285092	1	1.04203	0.209629	2
>sp|Q29437|AOCX_BOVIN Primary amine oxidase, liver isozyme OS=Bos taurus PE=1 SV=1;>tr|E1BD43|E1BD43_BOVIN Amine oxidase OS=Bos taurus GN=Bt.105260 PE=3 SV=1;>tr|F1MCC1|F1MCC1_BOVIN Amine oxidase OS=Bos taurus GN=Bt.4177 PE=3 SV=1;>tr|E1BC10|E1BC10_BOVIN A	4	4	4.16495	3.82569	4.17883	4.30481	4.16104	4.04595	4.43382	4.19926	4.18133	4.00307	3.53962	3.93	3.95846	4.20246	3.95517	4.17548	4.24969	4.1702	4.08948	4.27944			0.206067	1	1.05905	0.205815	10
>tr|F1N3Q7|F1N3Q7_BOVIN Uncharacterized protein OS=Bos taurus GN=APOA4 PE=4 SV=1;>sp|Q32PJ2|APOA4_BOVIN Apolipoprotein A-IV OS=Bos taurus GN=APOA4 PE=2 SV=1	14	14	5.32203	4.66491	5.1669	5.36756	5.42998	5.42047	5.74019	5.37308	5.37654	5.70271	4.80954	4.95247	5.13583	5.23226	5.12018	4.99741	5.39104	5.20243	5.1602	5.43766			0.129203	1	1.62767	0.0838459	2
>sp|P62935|PPIA_BOVIN Peptidyl-prolyl cis-trans isomerase A OS=Bos taurus GN=PPIA PE=1 SV=2;>tr|Q861V9|Q861V9_BOVIN Peptidyl-prolyl cis-trans isomerase (Fragment) OS=Bos taurus PE=2 SV=1;>tr|G3X8B1|G3X8B1_BOVIN Uncharacterized protein OS=Bos taurus GN=Bt.5	3	3	5.55653	4.36431	4.88033	5.17444	4.6858	5.22899	4.85468	5.21516	4.8049	4.80887	4.6681	4.79869	4.72891	4.842	5.34996	5.24581	5.13434	4.50133	4.95108	4.58547			0.303146	1	0.0206328	0.97094	6
>tr|F1MGU7|F1MGU7_BOVIN Uncharacterized protein OS=Bos taurus GN=FGG PE=4 SV=1;>tr|Q3SZZ9|Q3SZZ9_BOVIN FGG protein OS=Bos taurus GN=FGG PE=2 SV=1;>sp|P12799|FIBG_BOVIN Fibrinogen gamma-B chain OS=Bos taurus GN=FGG PE=1 SV=1	18	18	5.96137	5.35145	5.69967	5.91639	5.71761	5.67779	6.06164	5.64561	5.69713	5.75112	5.32897	5.65667	5.62228	5.87698	5.72801	5.86746	5.89837	5.65421	5.79956	5.9163			0.066414	1	0.318083	0.601606	3
>sp|P08037|B4GT1_BOVIN Beta-1,4-galactosyltransferase 1 OS=Bos taurus GN=B4GALT1 PE=1 SV=3	11	11	5.80447	5.45612	5.46903	5.58491	5.37918	5.65513	5.92124	5.75972	5.59398	5.84168	5.65337	5.69597	5.62908	5.84135	5.56615	5.58168	5.871	5.78722	5.81629	5.70908			0.0589828	1	1.2114	0.161967	1
>tr|A7YWR0|A7YWR0_BOVIN Apolipoprotein E OS=Bos taurus GN=APOE PE=2 SV=1;>sp|Q03247|APOE_BOVIN Apolipoprotein E OS=Bos taurus GN=APOE PE=2 SV=1;>tr|Q0ZCB4|Q0ZCB4_BOVIN Apolipoprotein E (Fragment) OS=Bos taurus PE=4 SV=1	11	11	5.53446	5.33969	5.8188	5.76553	6.00497	5.28657	5.25943	5.55057	5.44655	5.41936	5.21961	5.42742	5.64831	5.24986	5.56377	5.60157	5.77605	5.57074	5.68306	5.63445			0.36115	1	1.53388	0.0977886	3
>tr|Q3SX32|Q3SX32_BOVIN Mannose 6 phosphate receptor binding protein 1 OS=Bos taurus GN=M6PRBP1 PE=2 SV=1	6	6	4.93708	4.43385	4.61911	4.76836	4.41724	4.7015	4.48163	4.38929	4.29555	4.35272	4.21035	4.30957	4.5356	4.22329	4.80388	4.82666	4.33427	4.65039	4.5369	4.8024			0.30959	1	0.611877	0.417927	1
>tr|F1MX65|F1MX65_BOVIN Uncharacterized protein OS=Bos taurus GN=OS9 PE=4 SV=1;>sp|Q3MHX6|OS9_BOVIN Protein OS-9 OS=Bos taurus GN=OS9 PE=2 SV=1	10	10	5.25945	4.64728	4.91379	5.35553	5.18373	5.16209	5.41335	5.21354	5.06262	5.33708	4.83586	4.87715	4.93826	5.10619	4.95598	4.92704	4.86001	4.99204	4.88517	5.04638			0.203812	1	1.31972	0.1358	3
>tr|G3N0S9|G3N0S9_BOVIN Uncharacterized protein OS=Bos taurus GN=Bt.30402 PE=4 SV=1	4	4	4.88571	4.45824	4.59765	5.05415	4.87233	4.79014	5.26228	4.64744	4.30589	4.65577	4.33397	4.20162	4.151	4.72308	4.74047	4.70151	4.31792	4.41906	4.42983	4.61797			0.14001	1	0.8302	0.295685	1
>tr|F1MFI4|F1MFI4_BOVIN Uncharacterized protein (Fragment) OS=Bos taurus GN=Bt.38405 PE=4 SV=2	7	7	4.95536	3.77082	4.2651	4.56416	4.38304	4.49272	4.61893	4.16935	4.28787	4.37332	4.49077	4.19956	4.34502	4.85753	4.50308	4.07969	3.42264	4.02768	3.37072	4.4087			0.748122	1	1.32546	0.135737	1
>tr|B0JYP6|B0JYP6_BOVIN IGK protein OS=Bos taurus GN=IGK PE=2 SV=1;>tr|F1MH40|F1MH40_BOVIN Uncharacterized protein OS=Bos taurus GN=Bt.105356 PE=4 SV=2;>tr|F1MZ96|F1MZ96_BOVIN Uncharacterized protein OS=Bos taurus GN=Bt.105356 PE=4 SV=2;>tr|Q05B55|Q05B55_B	10	10	6.62697	5.53212	5.97147	6.52375	6.07947	6.19802	6.86591	6.24514	6.11641	6.13056	5.28384	5.61945	5.87175	6.10704	5.82555	6.06104	6.12587	5.83334	5.82079	5.9785			0.029387	1	1.18399	0.170513	4
>tr|E1BDY3|E1BDY3_BOVIN Uncharacterized protein OS=Bos taurus GN=GLG1 PE=4 SV=2;>tr|G3N2K4|G3N2K4_BOVIN Uncharacterized protein OS=Bos taurus GN=GLG1 PE=4 SV=1	5	5	3.72376	3.087	3.25217	3.77487	3.64438	3.89102	3.94469	3.71753	3.51981	3.97882	3.19173	3.3354	3.58452	3.52099	3.53441	3.44056	3.85138	3.36357	3.59935	3.85454			0.0637266	1	1.06716	0.204153	2
>sp|Q2KIS7|TETN_BOVIN Tetranectin OS=Bos taurus GN=CLEC3B PE=2 SV=1	3	3	5.26668	4.77951	5.028	5.33094	5.15259	5.15388	5.43862	5.12238	4.84791	5.25734	4.93505	4.97227	4.99405	5.13497	4.98754	5.05396	5.39101	4.96724	5.22334	5.28332			0.0282991	1	0.375156	0.555447	1
>tr|E1BJL8|E1BJL8_BOVIN Uncharacterized protein OS=Bos taurus GN=FOLR1 PE=4 SV=1	6	5	4.84502	3.79067	3.9516	4.35968	3.02107	3.55139	3.17883	4.06296	3.28062	3.48233	3.23279	NaN	2.75466	3.14498	4.37847	4.26522	NaN	NaN	3.69484	3.87256			0.045807	1	0.508011	0.473064	1
>tr|F1MMR6|F1MMR6_BOVIN Uncharacterized protein OS=Bos taurus GN=CTSD PE=3 SV=1;>sp|P80209|CATD_BOVIN Cathepsin D OS=Bos taurus GN=CTSD PE=1 SV=2;>tr|Q9BGU5|Q9BGU5_BOVIN Cathepsin D (Fragment) OS=Bos taurus GN=cat-D PE=2 SV=1	3	3	4.54797	4.30899	4.49585	4.64875	4.64061	4.58175	4.36205	4.4978	4.39618	4.29885	4.11939	4.51962	4.13341	4.4531	4.55997	4.53303	5.17292	4.09506	4.72669	4.51224			0.197306	1	0.404624	0.528333	3
>sp|A6QR11|NELL2_BOVIN Protein kinase C-binding protein NELL2 OS=Bos taurus GN=NELL2 PE=2 SV=1	17	17	5.15381	4.54652	4.7445	5.12476	4.89602	5.08799	5.35545	5.17006	4.91577	5.14107	4.81614	4.99845	4.93452	5.16498	5.15567	5.29957	5.3616	5.05392	5.19714	5.31205			0.014649	1	1.43215	0.11474	1
>tr|F1MMP5|F1MMP5_BOVIN Uncharacterized protein OS=Bos taurus GN=ITIH1 PE=4 SV=1;>sp|Q0VCM5|ITIH1_BOVIN Inter-alpha-trypsin inhibitor heavy chain H1 OS=Bos taurus GN=ITIH1 PE=2 SV=1	10	10	4.10168	4.14876	4.48619	4.53039	4.60158	4.46495	4.7896	4.56769	4.26269	4.55999	4.0714	4.32428	4.38371	4.59731	4.50809	4.5168	4.75136	4.37616	4.62254	4.58091			0.295559	1	0.548775	0.449007	2
>sp|Q0VCX2|GRP78_BOVIN 78 kDa glucose-regulated protein OS=Bos taurus GN=HSPA5 PE=2 SV=1;>tr|F1N614|F1N614_BOVIN Uncharacterized protein OS=Bos taurus GN=GRP78 PE=3 SV=2;>tr|F1MMC6|F1MMC6_BOVIN Uncharacterized protein OS=Bos taurus GN=Bt.65104 PE=3 SV=1	18	17	5.26449	4.35033	4.78007	5.10524	4.85244	4.98836	5.12966	4.89182	4.75586	5.00869	4.53101	4.75658	4.82552	4.78048	4.82151	4.87332	5.02044	4.69296	4.82433	4.9083			0.0232556	1	0.329462	0.595081	3
>tr|F1MMD7|F1MMD7_BOVIN Uncharacterized protein OS=Bos taurus GN=Bt.5945 PE=4 SV=2;>sp|Q3T052|ITIH4_BOVIN Inter-alpha-trypsin inhibitor heavy chain H4 OS=Bos taurus GN=ITIH4 PE=2 SV=1;>tr|Q5EA67|Q5EA67_BOVIN Inter-alpha (Globulin) inhibitor H4 (Plasma Kall	17	17	4.69252	4.24045	4.54023	4.86625	4.74491	4.38164	5.2061	4.51398	5.46605	4.57968	4.19593	4.17525	4.4587	4.4969	4.40968	4.5878	4.62883	4.49671	4.44507	4.51264			0.413805	1	1.0344	0.210566	3
>sp|Q2HJD5|ECHD1_BOVIN Enoyl-CoA hydratase domain-containing protein 1 OS=Bos taurus GN=ECHDC1 PE=2 SV=1;>tr|F1MDK4|F1MDK4_BOVIN Uncharacterized protein (Fragment) OS=Bos taurus GN=ECHDC1 PE=3 SV=1	2	2	4.12869	NaN	3.50192	4.06487	3.30636	3.58649	3.5424	3.84416	3.33901	3.47553	2.60287	NaN	3.23081	NaN	3.61294	3.61491	NaN	3.52137	3.22822	3.52564			0.0299755	1	0.796546	0.311175	2
>sp|P81187|CFAB_BOVIN Complement factor B OS=Bos taurus GN=CFB PE=1 SV=2	17	17	5.4274	4.60663	5.12956	5.46917	5.35776	5.20028	5.34715	5.22886	4.92469	5.0327	4.68246	4.71604	4.80963	5.09854	4.81783	5.01528	5.0493	5.0331	4.9691	5.07588			0.0656651	1	1.21202	0.161967	2
>tr|A1L528|A1L528_BOVIN RAB1A, member RAS oncogene family OS=Bos taurus GN=RAB1A PE=2 SV=1;>tr|F1MYU3|F1MYU3_BOVIN Uncharacterized protein (Fragment) OS=Bos taurus GN=Bt.49381 PE=3 SV=1;>tr|Q3ZBD1|Q3ZBD1_BOVIN RAB1A, member RAS oncogene family OS=Bos tauru	6	4	5.31239	4.33616	4.39461	5.02743	3.99344	4.37212	4.32414	4.66591	3.83711	3.74021	4.27272	4.35689	4.06281	4.51811	5.07357	5.14192	4.28621	4.3721	4.60681	4.84031			0.225865	1	0.483375	0.487412	4
>tr|E1B8H1|E1B8H1_BOVIN Uncharacterized protein OS=Bos taurus GN=LOC784932 PE=3 SV=2;>tr|Q32T06|Q32T06_BOVIN Endopin 2C OS=Bos taurus PE=2 SV=1	12	5	5.6016	5.00762	5.90171	5.81287	5.2948	5.08558	5.72487	5.1182	5.7214	5.387	4.55434	4.62925	4.98204	5.08088	5.93777	5.08778	5.42328	4.90326	4.81831	5.03427			0.2616	1	0.838495	0.292705	2
>sp|Q3MHP2|RB11B_BOVIN Ras-related protein Rab-11B OS=Bos taurus GN=RAB11B PE=2 SV=3;>tr|F2Z4D5|F2Z4D5_BOVIN Uncharacterized protein OS=Bos taurus GN=RAB11A PE=3 SV=1;>sp|Q2TA29|RB11A_BOVIN Ras-related protein Rab-11A OS=Bos taurus GN=RAB11A PE=2 SV=3	5	5	5.11876	3.53836	3.78868	4.64457	3.75778	3.57833	4.22845	4.29451	3.53079	3.08279	3.84748	3.85964	4.03906	4.22058	4.72997	4.7172	4.00608	4.01195	4.21535	4.36195			0.0967046	1	0.432523	0.517136	3
>sp|Q0IIG8|RAB18_BOVIN Ras-related protein Rab-18 OS=Bos taurus GN=RAB18 PE=2 SV=1	6	6	5.50637	4.49894	4.60844	5.30899	4.0849	4.34531	4.3033	4.708	3.8604	3.55671	4.15427	4.0959	4.06487	4.61316	5.17499	5.47969	3.83952	4.1447	4.3967	4.89079			0.278761	1	0.471899	0.490686	1
>tr|F6K7J0|F6K7J0_BOVIN Complement regulatory protein variant 4 OS=Bos taurus GN=CD46 PE=2 SV=1;>tr|F6K7I9|F6K7I9_BOVIN Complement regulatory protein variant 3 OS=Bos taurus GN=CD46 PE=2 SV=1;>tr|F1N4W5|F1N4W5_BOVIN Uncharacterized protein OS=Bos taurus GN	3	3	4.94265	3.61222	4.08228	4.68658	3.74794	4.02362	4.31059	4.33469	3.71322	3.96498	3.54335	3.54219	3.53324	4.28044	4.66539	4.68896	3.90488	3.34766	3.91524	4.27075			0.243602	1	0.0963802	0.880075	11
>tr|G3N2D8|G3N2D8_BOVIN Uncharacterized protein OS=Bos taurus GN=Bt.28253 PE=4 SV=1	10	10	6.0393	5.095	5.18732	5.91219	4.58537	4.67728	4.71144	5.26858	4.65924	4.71065	4.19193	4.41964	4.2913	5.00087	5.75743	5.63218	4.72786	4.23671	4.96603	5.12853			0.107733	1	0.56224	0.44801	1
>sp|P11151|LIPL_BOVIN Lipoprotein lipase OS=Bos taurus GN=LPL PE=1 SV=2	9	9	5.61004	4.50262	4.64614	5.22376	4.77289	4.87571	4.87259	4.49042	4.08329	4.61368	4.32664	4.25135	4.24296	4.54335	4.28162	4.93705	4.79809	4.10223	4.49589	4.5746			0.382767	1	1.21846	0.161967	1
>sp|P07688|CATB_BOVIN Cathepsin B OS=Bos taurus GN=CTSB PE=1 SV=5	3	3	4.96383	3.94068	4.3903	4.9904	4.89857	4.63829	4.7113	4.52958	4.48586	4.62997	4.69268	4.32989	4.2014	4.87541	4.61381	4.79915	4.64215	3.77319	4.30673	4.85573			1.33172	1	0.0482278	0.932356	2
>tr|Q32PA1|Q32PA1_BOVIN CD59 molecule, complement regulatory protein OS=Bos taurus GN=CD59 PE=2 SV=1	3	3	6.6616	6.1233	6.15054	6.57484	6.22989	6.01974	5.94262	6.06179	5.90866	5.89976	5.60904	5.75556	5.78808	6.09107	6.44342	6.40312	5.52141	5.85812	5.83436	6.07817			0.343217	1	1.14042	0.176213	1
>tr|A6QLL8|A6QLL8_BOVIN Fructose-bisphosphate aldolase OS=Bos taurus GN=ALDOA PE=2 SV=1	3	3	4.06247	3.82458	4.1185	4.20542	3.42825	3.72596	3.45942	4.00505	3.02723	3.35866	3.57191	NaN	3.14597	3.13216	3.54727	3.62494	3.45936	3.46762	3.54033	3.66188			0.107031	1	1.42336	0.11474	1
>tr|F1MSI2|F1MSI2_BOVIN Uncharacterized protein (Fragment) OS=Bos taurus GN=AGRN PE=4 SV=1	5	5	3.63124	NaN	2.22401	3.47003	2.74489	3.24606	3.45744	3.34844	2.95426	3.11823	2.86581	NaN	2.21051	3.09583	3.22886	3.01603	3.05918	NaN	2.3962	2.59489			0.50102	1	0.379605	0.555447	1
>sp|Q2KIT0|HP20_BOVIN Protein HP-20 homolog OS=Bos taurus PE=2 SV=1	2	2	3.60697	3.61591	4.29354	3.64443	4.12208	4.02189	3.73853	3.57835	3.52729	3.40724	3.28289	3.6945	3.76575	4.13418	3.93562	3.77538	3.28932	3.75921	3.62901	3.22212			0.13608	1	0.447679	0.502541	1
>sp|Q2KJ32|SBP1_BOVIN Selenium-binding protein 1 OS=Bos taurus GN=SELENBP1 PE=1 SV=1	2	2	3.4531	2.87132	3.01296	3.11932	2.82982	3.97126	3.27612	3.69384	2.99894	3.24087	3.22394	2.97444	NaN	3.07192	3.40839	3.56793	NaN	2.91001	3.05273	3.26074			0.724696	1	0.57173	0.44482	1
>tr|F1N102|F1N102_BOVIN Uncharacterized protein OS=Bos taurus GN=Bt.19507 PE=4 SV=2;>tr|F1MX86|F1MX86_BOVIN Uncharacterized protein OS=Bos taurus GN=Bt.19507 PE=4 SV=2;>tr|Q2KIK9|Q2KIK9_BOVIN Complement component 8, beta polypeptide OS=Bos taurus GN=C8B PE	2	2	3.2235	2.73404	3.45796	4.01305	3.54694	2.79031	2.94934	2.46793	NaN	2.87739	2.60273	NaN	2.58863	NaN	3.20938	2.93747	3.06659	2.87374	2.97109	3.30737			0.293272	1	1.31013	0.137097	3
>tr|A1L5B6|A1L5B6_BOVIN Annexin 5 OS=Bos taurus GN=ANXA5 PE=2 SV=1;>tr|F6QVC9|F6QVC9_BOVIN Uncharacterized protein OS=Bos taurus GN=Bt.96612 PE=4 SV=1	6	1	5.03643	3.57522	3.42313	4.93517	NaN	NaN	NaN	3.81885	NaN	NaN	NaN	NaN	NaN	NaN	4.3366	4.12766	NaN	NaN	2.9838	3.4343			0.716617	1	0.575352	0.444417	3
>tr|A6QQA8|A6QQA8_BOVIN QSOX1 protein OS=Bos taurus GN=QSOX1 PE=2 SV=1;>tr|F1MM32|F1MM32_BOVIN Uncharacterized protein OS=Bos taurus GN=QSOX1 PE=4 SV=2	3	3	3.9326	3.22243	3.59762	4.22118	3.94061	3.76907	4.04029	3.41298	3.20989	3.95316	3.01532	3.15951	3.26602	3.14139	3.45821	3.2629	3.96907	3.03423	3.41024	3.438			0.150377	1	1.28142	0.144659	2
>tr|F1MX87|F1MX87_BOVIN Uncharacterized protein OS=Bos taurus GN=C8A PE=4 SV=1;>tr|Q2KIH5|Q2KIH5_BOVIN Complement component 8, alpha polypeptide OS=Bos taurus GN=C8A PE=2 SV=1;>tr|Q1JPD0|Q1JPD0_BOVIN Complement component 8, alpha polypeptide (Fragment) OS=	4	4	4.12959	2.61226	3.45335	4.10158	3.84404	3.24232	3.25952	3.65966	NaN	3.52638	2.86272	NaN	3.31349	3.38803	2.72921	3.37079	3.57135	3.37923	3.1364	3.44567			0.143786	1	0.592689	0.433107	3
>tr|B0JYR0|B0JYR0_BOVIN Furin (Paired basic amino acid cleaving enzyme) OS=Bos taurus GN=FURIN PE=2 SV=1;>sp|Q28193|FURIN_BOVIN Furin OS=Bos taurus GN=FURIN PE=1 SV=1	3	3	3.19943	NaN	NaN	NaN	NaN	NaN	3.32214	NaN	2.42315	NaN	2.66737	3.12441	3.20607	NaN	3.132	NaN	4.02028	2.8876	3.41883	3.50409			0.456648	1	0.589801	0.433107	2
>tr|Q08DN1|Q08DN1_BOVIN Tumor necrosis factor receptor superfamily, member 21 OS=Bos taurus GN=TNFRSF21 PE=2 SV=1;>tr|F1MDH9|F1MDH9_BOVIN Uncharacterized protein (Fragment) OS=Bos taurus GN=LOC785024 PE=4 SV=1	2	2	3.78726	2.76643	3.31725	3.6636	3.47088	3.48424	3.81634	3.65269	3.36875	3.57162	3.03607	3.37286	3.32379	3.2927	3.33554	3.29986	3.57295	3.20537	2.98901	3.51936			0.00265372	1	0.552894	0.449007	2
>tr|F1MNN7|F1MNN7_BOVIN Uncharacterized protein OS=Bos taurus GN=LBP PE=4 SV=1;>sp|Q2TBI0|LBP_BOVIN Lipopolysaccharide-binding protein OS=Bos taurus GN=LBP PE=2 SV=1	2	2	4.69151	3.77688	4.1645	4.97914	4.59394	NaN	3.66676	3.838	4.37645	3.90953	NaN	NaN	3.19254	3.75374	3.66302	3.68671	NaN	3.17254	NaN	3.60661			0.420188	1	1.88791	0.0552891	2
>sp|P31976|EZRI_BOVIN Ezrin OS=Bos taurus GN=EZR PE=1 SV=2	7	6	5.14289	4.03695	3.84189	4.73722	4.04513	4.14195	3.88918	4.00706	4.74078	3.73447	3.60997	3.58171	3.07584	3.87411	4.57048	4.54314	4.22647	3.34036	3.96192	3.64498			0.853483	1	0.552496	0.449007	1
>tr|B0JYM4|B0JYM4_BOVIN CD63 protein OS=Bos taurus GN=CD63 PE=2 SV=1;>sp|Q9XSK2|CD63_BOVIN CD63 antigen OS=Bos taurus GN=CD63 PE=2 SV=4	2	2	4.9787	4.10633	4.24846	4.76885	NaN	4.1608	NaN	3.77413	NaN	NaN	4.47426	4.05173	NaN	4.5318	4.93429	4.4917	NaN	NaN	4.95101	3.66056			0.885251	1	0.272511	0.660783	2
>tr|F1MJQ1|F1MJQ1_BOVIN Uncharacterized protein OS=Bos taurus GN=RAB7A PE=3 SV=1;>sp|Q3T0F5|RAB7A_BOVIN Ras-related protein Rab-7a OS=Bos taurus GN=RAB7A PE=2 SV=1	2	2	4.99604	3.20623	3.13043	4.82509	3.89235	3.07809	3.94605	4.06292	3.75746	NaN	3.55695	3.71953	3.54254	3.59948	4.59742	4.6218	4.05979	3.73873	NaN	3.71389			0.16374	1	0.0832521	0.893358	2
>tr|F1MXQ3|F1MXQ3_BOVIN Uncharacterized protein (Fragment) OS=Bos taurus GN=Bt.11748 PE=4 SV=2	3	3	4.18749	2.68455	3.41502	3.92573	3.8536	3.77543	3.93044	3.64237	3.4472	3.7687	3.69968	3.43454	3.31796	3.78179	3.78267	3.88407	3.89623	3.56054	3.63132	3.75931			0.476968	1	0.0577993	0.916294	2
>sp|Q58CQ9|VNN1_BOVIN Pantetheinase OS=Bos taurus GN=VNN1 PE=2 SV=1	2	2	3.27388	NaN	3.51322	3.44905	2.91712	3.53335	3.50722	3.35681	3.31108	3.66672	3.07504	3.62869	3.70135	3.71959	3.41142	3.52762	3.78895	3.23421	3.5165	3.79802			0.286435	1	0.459827	0.498077	1
>tr|F1MIR4|F1MIR4_BOVIN Uncharacterized protein (Fragment) OS=Bos taurus GN=Bt.64131 PE=3 SV=1	2	2	4.60612	3.30285	3.21341	4.50489	3.34315	3.54515	3.62066	3.75732	NaN	NaN	NaN	NaN	NaN	3.33451	4.13098	4.14267	3.50088	NaN	NaN	3.80888			0.243937	1	0.0115178	0.982964	1
>tr|Q17QC7|Q17QC7_BOVIN Poliovirus receptor-related 2 (Herpesvirus entry mediator B) OS=Bos taurus GN=PVRL2 PE=2 SV=1	3	3	4.14345	NaN	3.36069	4.02563	4.04883	4.15042	4.14604	4.03056	3.79485	4.05831	3.58533	3.49328	3.39573	3.70347	3.69805	3.4043	3.92997	3.27706	3.70712	3.82735			0.350281	1	1.5933	0.0892834	2
>sp|P68250|1433B_BOVIN 14-3-3 protein beta/alpha OS=Bos taurus GN=YWHAB PE=1 SV=2;>sp|Q0VC36|1433S_BOVIN 14-3-3 protein sigma OS=Bos taurus GN=SFN PE=2 SV=1;>tr|A7Z057|A7Z057_BOVIN Uncharacterized protein OS=Bos taurus GN=YWHAG PE=2 SV=1;>sp|P68252|1433G_B	3	2	4.48239	3.44806	3.51893	4.44232	3.24504	3.00173	3.09851	3.15293	3.12097	3.6558	3.68832	3.22497	2.87952	NaN	4.27912	4.2058	3.78395	3.61966	3.55576	3.95324			0.269478	1	0.870131	0.279701	8
>tr|Q2KIF2|Q2KIF2_BOVIN Leucine-rich alpha-2-glycoprotein 1 OS=Bos taurus GN=LRG1 PE=2 SV=1	5	5	5.01703	4.52184	4.65632	5.17932	4.79158	4.84099	5.09805	4.87721	4.56337	4.75985	4.41088	4.80774	5.09823	4.85831	4.70009	4.60799	4.99426	4.64737	4.69047	3.98242			0.0492741	1	0.32865	0.595081	1
>tr|A5PJT7|A5PJT7_BOVIN ECM1 protein OS=Bos taurus GN=ECM1 PE=2 SV=1;>tr|F1MWT6|F1MWT6_BOVIN Uncharacterized protein OS=Bos taurus GN=Bt.5525 PE=4 SV=1	3	3	4.25914	3.29929	3.60512	4.21237	3.86937	3.89078	4.34044	4.14092	3.64827	3.89715	3.20917	3.59844	3.37157	3.44198	3.66396	3.78116	4.14805	3.7094	3.81425	3.9974			0.00455621	1	1.42813	0.11474	2
>sp|Q05927|5NTD_BOVIN 5-nucleotidase OS=Bos taurus GN=NT5E PE=1 SV=2;>tr|G3MZC1|G3MZC1_BOVIN Uncharacterized protein (Fragment) OS=Bos taurus GN=Bt.57034 PE=4 SV=1	5	5	4.60331	3.52469	3.20398	4.47134	3.02796	3.8217	3.87105	4.02678	3.17499	3.55083	3.26186	3.23855	2.9653	3.65937	4.52081	4.37094	3.25888	2.92687	3.30578	4.02127			0.345923	1	0.0382238	0.940953	2
>tr|F2FB38|F2FB38_BOVIN Mucin-16 OS=Bos taurus GN=MUC16 PE=4 SV=1;>tr|G3MXR2|G3MXR2_BOVIN Uncharacterized protein OS=Bos taurus GN=MUC16 PE=4 SV=1;>tr|F1MRA6|F1MRA6_BOVIN Uncharacterized protein OS=Bos taurus GN=MUC16 PE=4 SV=2	11	11	4.75912	3.68251	3.99189	4.42334	4.03201	3.91051	4.22871	4.22344	3.67689	3.92362	3.42405	3.62448	3.50813	4.01699	3.95796	4.15119	3.85415	3.50649	3.76602	4.04368			0.075843	1	0.888543	0.277449	4
>tr|F1N514|F1N514_BOVIN Uncharacterized protein OS=Bos taurus GN=CD5L PE=4 SV=2;>tr|A6QNW7|A6QNW7_BOVIN CD5L protein OS=Bos taurus GN=CD5L PE=2 SV=1	9	9	5.2724	4.49496	4.64036	5.46462	4.67181	5.22407	5.37526	5.32968	5.16684	4.90628	4.52169	4.76138	4.8098	4.80851	5.08941	5.12186	5.35982	4.7217	4.94329	4.10711			0.0752744	1	0.521338	0.46488	2
>tr|E1BF27|E1BF27_BOVIN Uncharacterized protein OS=Bos taurus GN=SLC38A10 PE=4 SV=2	4	4	3.81674	3.57887	3.67894	4.03169	3.85861	3.93837	4.27811	3.62589	3.76677	4.32463	3.93479	3.77646	3.44668	3.98339	3.76406	3.67531	4.17345	3.86055	3.79575	4.12015			0.479243	1	0.354429	0.575825	1
>sp|Q2TBX4|HSP13_BOVIN Heat shock 70 kDa protein 13 OS=Bos taurus GN=HSPA13 PE=2 SV=1	4	4	4.99174	NaN	3.91987	4.60156	4.26564	4.2332	4.58467	4.31311	4.19056	4.52161	4.11046	4.13335	4.13181	4.61357	4.34827	4.2068	4.4325	4.16894	4.11968	4.14678			0.287979	1	0.251406	0.68747	1
>tr|G3MX65|G3MX65_BOVIN Uncharacterized protein OS=Bos taurus GN=WFDC2 PE=4 SV=1;>tr|Q3T0Z0|Q3T0Z0_BOVIN Uncharacterized protein OS=Bos taurus GN=WFDC2 PE=2 SV=1	2	2	4.6503	4.37552	4.55332	4.80612	5.04139	4.43117	4.58908	4.44573	4.46004	4.68054	4.33846	3.99907	4.27117	4.47522	4.57577	4.51291	5.12258	4.30166	4.51578	4.17447			0.296357	1	0.651796	0.393232	2
>tr|F1MPE1|F1MPE1_BOVIN Uncharacterized protein OS=Bos taurus GN=Bt.14520 PE=4 SV=2	6	6	4.93487	3.28416	3.77173	4.13085	3.80562	3.7841	4.07218	3.9412	3.33409	3.97924	3.37313	3.54884	3.58466	4.10264	3.60724	4.14411	3.94245	4.3601	3.83769	4.19349			0.0741478	1	0.533314	0.455846	1
>tr|F1MNW4|F1MNW4_BOVIN Uncharacterized protein OS=Bos taurus GN=Bt.23843 PE=4 SV=2;>tr|A5D7R6|A5D7R6_BOVIN ITIH2 protein OS=Bos taurus GN=ITIH2 PE=2 SV=1	9	9	4.5161	4.17843	4.44562	4.5986	4.49798	4.38178	4.64693	4.3635	4.36661	4.42736	3.95062	4.16173	4.20211	4.45139	4.23485	4.0839	4.36935	4.11945	4.19016	4.23246			0.253067	1	1.79572	0.0651883	2
>tr|A6QPP2|A6QPP2_BOVIN SERPIND1 protein OS=Bos taurus GN=SERPIND1 PE=2 SV=1	4	4	4.76199	3.77312	4.20941	4.65194	4.44271	4.35763	4.58483	4.58378	4.04591	4.298	3.45876	3.91801	4.04992	4.21384	4.24839	4.09262	4.37891	3.50875	4.03878	4.23497			0.0338274	1	0.843048	0.292285	1
>sp|P01966|HBA_BOVIN Hemoglobin subunit alpha OS=Bos taurus GN=HBA PE=1 SV=2	2	2	3.27379	3.4475	3.90236	4.42477	3.74377	4.2104	3.88525	3.97161	3.94703	NaN	4.49075	4.07558	4.15691	4.19656	4.70225	3.91375	4.31507	3.19312	3.92773	4.25159			0.12782	1	0.885875	0.277449	1
>tr|F1N7D7|F1N7D7_BOVIN Uncharacterized protein OS=Bos taurus GN=DAG1 PE=4 SV=1;>sp|O18738|DAG1_BOVIN Dystroglycan OS=Bos taurus GN=DAG1 PE=1 SV=1	2	2	4.62003	3.57434	3.83115	4.26105	4.08902	4.29951	4.44883	4.24854	4.22593	4.52532	4.00531	3.99131	3.88718	4.26757	4.17823	4.1049	4.23945	3.76015	3.99928	4.26442			0.457085	1	0.636194	0.401296	2
>tr|A5D9D2|A5D9D2_BOVIN Complement component 4 binding protein, alpha chain OS=Bos taurus GN=C4BPA PE=2 SV=1;>sp|Q28065|C4BPA_BOVIN C4b-binding protein alpha chain OS=Bos taurus GN=C4BPA PE=2 SV=1	5	5	4.4869	3.62083	4.29254	4.62166	4.53424	4.2449	4.83065	4.35624	4.03531	4.15509	3.3668	3.91614	3.8489	4.31361	4.15458	4.1304	3.45333	4.21115	4.01595	4.29785			0.123227	1	0.673946	0.376644	3
>sp|Q5EA79|GALM_BOVIN Aldose 1-epimerase OS=Bos taurus GN=GALM PE=2 SV=1	4	4	4.41318	3.52143	3.58549	4.34667	3.74161	4.19479	4.29325	3.99452	3.80264	4.13159	3.95629	4.01094	3.60918	3.98347	4.34029	4.25969	4.49492	3.82272	4.10476	4.34463			0.506887	1	0.327699	0.595081	1
>sp|O02659|MBL2_BOVIN Mannose-binding protein C OS=Bos taurus GN=MBL PE=2 SV=1	2	2	4.49174	4.20526	4.40273	4.70944	4.48497	3.94232	4.37403	3.93833	3.90286	4.02408	3.98932	3.5573	4.15897	4.47407	3.67773	4.21972	3.40632	3.61481	3.85224	4.35274			0.234786	1	1.40642	0.117155	1
>tr|G3X6N3|G3X6N3_BOVIN Uncharacterized protein OS=Bos taurus GN=Bt.5336 PE=4 SV=1	69	5	4.3228	3.43222	4.40533	4.26607	4.25729	3.92153	4.54882	3.75906	NaN	3.7645	3.95902	4.07755	4.58868	4.30698	3.70095	4.12516	4.7385	4.11929	4.0146	4.37907			0.114497	1	0.148412	0.80648	1
>tr|G3N1U4|G3N1U4_BOVIN Uncharacterized protein OS=Bos taurus GN=Bt.92049 PE=4 SV=1	10	2	4.88333	3.54893	4.25234	4.71203	4.24092	4.09153	5.33993	4.54851	5.05971	4.37044	3.59817	3.66618	4.17875	4.45324	3.63364	4.3486	4.4206	4.09304	4.26654	4.38034			0.220191	1	1.16961	0.17225	1
>sp|P07107|ACBP_BOVIN Acyl-CoA-binding protein OS=Bos taurus GN=DBI PE=1 SV=2	3	3	5.80062	4.89856	5.23548	5.41335	5.10792	5.49689	5.10636	5.18438	5.1186	5.25127	5.30406	5.22904	5.31775	5.48121	5.31975	5.39071	5.42547	5.08279	5.27974	4.41954			0.911617	1	0.173121	0.783681	1
>tr|F1MMK9|F1MMK9_BOVIN Uncharacterized protein OS=Bos taurus GN=AMBP PE=4 SV=2;>sp|P00978|AMBP_BOVIN Protein AMBP OS=Bos taurus GN=AMBP PE=1 SV=2	3	3	4.62051	3.79944	4.16915	4.59623	4.31884	4.26347	4.43672	4.52263	4.27513	4.51092	4.06164	3.86177	4.28101	4.54306	4.49956	4.19844	4.75398	4.409	4.2356	4.46725			0.149855	1	0.153368	0.802831	2
>sp|P13696|PEBP1_BOVIN Phosphatidylethanolamine-binding protein 1 OS=Bos taurus GN=PEBP1 PE=1 SV=2	3	3	4.79139	4.06807	4.2727	4.87355	4.50965	4.64003	4.59273	4.38376	4.53595	4.23729	4.01578	3.73103	4.01645	4.40632	4.54004	4.28841	4.48603	3.88812	4.01077	4.48169			0.519988	1	0.805085	0.307793	1
>sp|P62871|GBB1_BOVIN Guanine nucleotide-binding protein G(I)/G(S)/G(T) subunit beta-1 OS=Bos taurus GN=GNB1 PE=1 SV=3	3	3	5.18758	NaN	3.4767	4.61971	3.29221	4.01895	4.11926	3.99208	3.81769	4.04372	3.21619	3.78194	4.14576	NaN	4.76883	4.77297	3.88792	4.25878	3.94606	4.49283			0.0402175	1	0.0779978	0.895579	2
>sp|P15396|ENPP3_BOVIN Ectonucleotide pyrophosphatase/phosphodiesterase family member 3 OS=Bos taurus GN=ENPP3 PE=1 SV=2	11	11	5.3537	4.17745	4.38108	5.03193	3.77915	3.7797	3.73909	4.51124	3.69978	3.69449	3.6375	3.47628	3.14136	4.13347	5.08411	5.26236	4.03076	3.26656	4.32648	4.64765			0.199384	1	0.499375	0.479305	1
>tr|E1BQ28|E1BQ28_BOVIN Uncharacterized protein OS=Bos taurus GN=SLC39A8 PE=4 SV=1	2	2	5.40166	4.60148	4.6029	5.33858	4.32474	4.60317	NaN	4.78512	NaN	4.62814	NaN	4.06789	NaN	4.49543	5.54217	5.39187	4.26998	3.84927	4.5741	4.68111			0.520126	1	0.0719792	0.902208	1
>tr|F1N5T0|F1N5T0_BOVIN Uncharacterized protein OS=Bos taurus GN=CUTA PE=4 SV=1;>sp|P69678|CUTA_BOVIN Protein CutA OS=Bos taurus GN=CUTA PE=1 SV=1;>tr|F1MTI7|F1MTI7_BOVIN Uncharacterized protein OS=Bos taurus GN=CUTA PE=4 SV=1;>tr|Q1RMP3|Q1RMP3_BOVIN CutA	2	2	4.82267	3.23576	3.76182	4.49967	4.18492	4.37752	5.0607	4.4541	4.36791	4.59067	4.05154	4.25643	NaN	4.64555	4.2985	4.34143	4.6773	4.51949	3.61946	4.70176			0.0149451	1	0.367224	0.562378	4
>tr|B0JYN1|B0JYN1_BOVIN Cathepsin L2 OS=Bos taurus GN=CTSL2 PE=2 SV=1;>sp|P25975|CATL1_BOVIN Cathepsin L1 OS=Bos taurus GN=CTSL1 PE=1 SV=3;>sp|Q5E998|CATL2_BOVIN Cathepsin L2 OS=Bos taurus GN=CTSL2 PE=2 SV=1;>tr|Q862I3|Q862I3_BOVIN Similar to preprocatheps	4	4	4.66697	3.97193	4.24155	4.68865	4.44425	4.51327	4.68158	4.56934	4.25169	4.54009	4.26607	4.44846	4.51638	4.68445	4.3918	4.54345	4.64181	4.51763	4.64861	4.70448			0.012463	1	0.407404	0.528124	4
>sp|P80311|PPIB_BOVIN Peptidyl-prolyl cis-trans isomerase B OS=Bos taurus GN=PPIB PE=1 SV=4;>tr|Q862P3|Q862P3_BOVIN Similar to cyclophilin B (Fragment) OS=Bos taurus PE=2 SV=1	2	2	4.84842	3.31391	4.12911	4.59074	4.26656	4.64599	4.96895	4.63505	4.6393	NaN	4.20235	4.21085	3.90149	4.52126	4.44764	4.53656	4.7364	4.29279	4.55678	4.7281			0.124052	1	0.87679	0.278031	2
>tr|F1N1I6|F1N1I6_BOVIN Uncharacterized protein OS=Bos taurus GN=GSN PE=4 SV=1;>tr|F1MJH1|F1MJH1_BOVIN Uncharacterized protein OS=Bos taurus GN=GSN PE=4 SV=1;>sp|Q3SX14|GELS_BOVIN Gelsolin OS=Bos taurus GN=GSN PE=2 SV=1	6	6	4.94091	4.34145	4.65774	5.23997	4.98214	4.84915	5.15348	4.8728	4.47732	4.95397	4.27706	4.34349	4.51677	4.66856	4.62422	4.59222	4.96984	4.33244	4.60121	4.75798			0.0755982	1	0.943551	0.250091	3
>sp|P61585|RHOA_BOVIN Transforming protein RhoA OS=Bos taurus GN=RHOA PE=1 SV=1	3	2	4.81927	4.26067	4.57315	4.88772	3.80634	4.15363	4.55766	4.46901	4.35948	4.34365	3.93773	4.24711	4.35345	4.61066	5.14132	4.87528	4.21307	4.19368	4.27667	4.75799			0.0530546	1	0.0113575	0.982964	1
>tr|F1MNV5|F1MNV5_BOVIN Uncharacterized protein OS=Bos taurus GN=Bt.4210 PE=4 SV=2;>sp|P01044|KNG1_BOVIN Kininogen-1 OS=Bos taurus GN=KNG1 PE=1 SV=1	11	4	5.29955	4.41211	4.76402	5.13846	4.92122	4.66875	4.98284	5.05937	4.69814	4.6087	4.49217	4.72365	5.27163	4.91524	4.44946	4.76771	4.95198	4.89613	4.75615	4.79311			0.280835	1	0.0625921	0.910492	2
>tr|F1MNQ4|F1MNQ4_BOVIN Uncharacterized protein OS=Bos taurus GN=SOD1 PE=3 SV=2;>sp|P00442|SODC_BOVIN Superoxide dismutase [Cu-Zn] OS=Bos taurus GN=SOD1 PE=1 SV=2;>tr|Q861T4|Q861T4_BOVIN Similar to superoxide dismutase (Fragment) OS=Bos taurus PE=2 SV=1;>t	2	2	4.94225	4.0807	4.42719	4.76626	4.5516	4.85471	4.84514	4.76421	4.38023	4.82925	4.60377	4.49817	4.54754	4.69405	4.94079	4.88342	4.86276	4.47566	4.59676	4.81439			0.372924	1	0.230811	0.715515	4
>sp|P15497|APOA1_BOVIN Apolipoprotein A-I OS=Bos taurus GN=APOA1 PE=1 SV=3	8	8	4.90452	3.87286	4.80292	4.92625	5.18913	4.81838	5.07357	4.92112	4.98473	5.17823	4.13605	3.93931	3.9628	4.47185	4.44705	4.68507	5.46581	4.44897	4.62397	4.82751			0.0770315	1	1.86113	0.057111	1
>tr|F1MZN6|F1MZN6_BOVIN Uncharacterized protein (Fragment) OS=Bos taurus GN=Bt.14715 PE=3 SV=1;>tr|Q3SZH5|Q3SZH5_BOVIN Angiotensinogen (Serpin peptidase inhibitor, clade A, member 8) OS=Bos taurus GN=AGT PE=2 SV=1	7	7	4.80477	4.3134	4.7491	4.9618	4.8973	4.87217	4.5143	4.50907	4.63765	4.88436	4.24674	4.38562	4.18792	4.81869	4.65937	4.74507	5.12107	4.80893	4.76911	4.83299			0.191492	1	1.14942	0.176213	2
>sp|Q2KIU3|HP252_BOVIN Protein HP-25 homolog 2 OS=Bos taurus PE=2 SV=1	3	3	5.91256	3.94908	4.46279	4.98129	4.40276	4.34335	5.04618	4.62421	4.22259	4.48971	3.93456	4.31018	4.75027	4.91548	4.60346	4.32048	5.09132	3.87573	3.88371	4.85331			0.0146059	1	0.105185	0.870386	1
>sp|P19803|GDIR1_BOVIN Rho GDP-dissociation inhibitor 1 OS=Bos taurus GN=ARHGDIA PE=1 SV=3;>tr|E1B7Z2|E1B7Z2_BOVIN Uncharacterized protein OS=Bos taurus GN=Bt.48750 PE=4 SV=1;>tr|Q58DT6|Q58DT6_BOVIN Rho GDP dissociation inhibitor (GDI) alpha OS=Bos taurus	3	3	4.75618	4.04739	4.33131	4.56349	4.28217	3.40829	4.75207	4.23835	NaN	4.35599	3.99142	4.58777	4.58745	4.39801	4.49482	4.28827	4.69595	3.93491	4.70406	4.902			0.257557	1	0.182163	0.779154	5
>tr|B6VAP7|B6VAP7_BOVIN CDC42 protein OS=Bos taurus GN=CDC42 PE=2 SV=1;>sp|Q2KJ93|CDC42_BOVIN Cell division control protein 42 homolog OS=Bos taurus GN=CDC42 PE=1 SV=1;>tr|F1MND1|F1MND1_BOVIN Uncharacterized protein (Fragment) OS=Bos taurus GN=CDC42 PE=3 S	3	2	5.76163	4.85472	4.96173	5.70766	4.51006	4.85347	5.01753	4.90072	4.79577	4.51296	4.12186	4.21656	4.2333	4.56263	5.58065	5.26326	4.17327	NaN	4.4201	4.92981			0.10945	1	0.566371	0.447032	3
>tr|F1MXV8|F1MXV8_BOVIN Uncharacterized protein OS=Bos taurus GN=SERPINA3-7 PE=3 SV=1;>tr|Q5J801|Q5J801_BOVIN Endopin 2B OS=Bos taurus PE=2 SV=1;>tr|Q27984|Q27984_BOVIN Alpha1-antichymotrypsin isoform pHHK12 (Fragment) OS=Bos taurus PE=2 SV=1;>tr|Q3SZQ8|Q3	11	4	5.47076	3.66141	4.36212	5.06603	4.81173	4.67506	5.07177	4.8658	4.94974	4.77334	4.52384	4.30044	4.52858	4.9311	4.67206	4.90512	5.21529	4.97976	4.63324	4.98644			0.153827	1	0.331332	0.595081	5
>tr|A1L5C2|A1L5C2_BOVIN Adipose differentiation-related protein OS=Bos taurus GN=ADFP PE=2 SV=1;>sp|Q9TUM6|PLIN2_BOVIN Perilipin-2 OS=Bos taurus GN=PLIN2 PE=2 SV=1;>tr|F1N1N6|F1N1N6_BOVIN Uncharacterized protein OS=Bos taurus GN=PLIN2 PE=4 SV=1;>tr|Q8HZM7|	13	13	5.80381	4.70987	4.71589	5.37223	4.42215	4.80155	4.90065	4.95326	4.30792	4.74966	4.47741	4.47809	4.19204	4.84051	5.33161	5.83057	4.46249	4.44613	4.76545	5.00467			0.432628	1	0.172808	0.783681	8
>sp|P00735|THRB_BOVIN Prothrombin OS=Bos taurus GN=F2 PE=1 SV=2	9	9	5.06948	4.71609	4.96341	5.13748	5.06461	4.87297	5.0412	5.0633	5.01355	5.02313	4.6531	4.75146	4.85153	4.98605	4.91259	4.80279	4.96609	4.92391	4.9522	5.02152			0.573184	1	0.87677	0.278031	1
>sp|Q95121|PEDF_BOVIN Pigment epithelium-derived factor OS=Bos taurus GN=SERPINF1 PE=1 SV=1	7	7	4.97298	4.30259	4.60665	5.04183	4.86202	4.90427	5.0569	5.04013	4.93003	4.85783	4.43123	4.69259	4.72723	4.89483	4.76956	4.80739	5.06915	4.79875	4.89565	5.02678			0.0714328	1	0.859322	0.284119	1
>sp|Q3MHN2|CO9_BOVIN Complement component C9 OS=Bos taurus GN=C9 PE=2 SV=1	8	8	5.2408	4.42249	4.9052	5.27423	5.09985	5.09367	5.16563	5.19802	5.23586	5.24569	4.57315	4.59088	4.69553	4.94572	4.91196	4.83164	4.90501	4.84965	4.9482	5.04226			0.450179	1	1.62743	0.0838459	1
>tr|Q5DPW9|Q5DPW9_BOVIN Cystatin E/M OS=Bos taurus GN=CST6 PE=4 SV=1;>tr|F6QEL0|F6QEL0_BOVIN Uncharacterized protein OS=Bos taurus GN=CST6 PE=4 SV=1	4	4	5.15088	4.28271	4.68238	5.13037	4.91967	5.18193	5.25705	5.20208	4.96887	5.48985	4.79057	4.86406	4.8057	5.02354	4.90222	4.95039	5.28167	4.99131	5.01999	5.10199			0.0434681	1	1.34134	0.132561	3
>tr|F1MV90|F1MV90_BOVIN Uncharacterized protein OS=Bos taurus GN=LOC784223 PE=4 SV=2	2	2	5.15518	4.3684	4.65127	4.79077	4.9087	4.91557	5.0026	4.66529	4.94255	3.34984	3.31114	4.24259	NaN	3.40581	4.71819	3.67363	3.44376	3.14851	3.11647	5.1797			0.000942958	1	1.15174	0.176213	1
>sp|A8YXY3|SEP15_BOVIN 15 kDa selenoprotein OS=Bos taurus GN=SEP15 PE=2 SV=2;>tr|Q58DU4|Q58DU4_BOVIN 15 kDa selenoprotein isoform 1 OS=Bos taurus GN=SEP15 PE=4 SV=1	2	2	5.6595	4.39582	4.62292	5.68666	4.98728	5.11478	5.27987	5.00484	4.98473	5.27637	5.05835	4.94905	4.89622	5.28459	5.23967	4.90838	5.19346	5.08976	5.00346	5.23767			0.41472	1	0.00385539	0.995607	2
>tr|F7VJN3|F7VJN3_BOVIN Major histocompatibility class I related protein (Fragment) OS=Bos taurus GN=MIC3 PE=2 SV=1	2	2	4.78889	4.94853	5.5001	4.64652	5.21434	5.30477	3.14426	5.59459	5.45918	4.98012	4.93789	5.4486	5.89341	5.87281	5.08433	5.27905	4.84468	5.54281	5.39683	5.26956			0.722967	1	0.325088	0.595306	1
>tr|A6QNL0|A6QNL0_BOVIN Monocyte differentiation antigen CD14 OS=Bos taurus GN=CD14 PE=2 SV=1;>tr|A8DBT6|A8DBT6_BOVIN Monocyte differentiation antigen CD14 OS=Bos taurus GN=CD14 PE=3 SV=1;>sp|Q95122|CD14_BOVIN Monocyte differentiation antigen CD14 OS=Bos t	7	7	5.8132	4.77619	4.9937	5.6496	5.21627	5.39213	5.61472	5.40475	5.20415	5.34864	4.92664	5.2872	5.32498	5.48058	5.41667	5.30767	5.60073	5.21112	5.2772	5.32811			0.0416239	1	0.0420419	0.940953	4
>tr|Q3ZCL0|Q3ZCL0_BOVIN Cysteine-rich secretory protein 2 OS=Bos taurus GN=CRISP3 PE=2 SV=1;>tr|F6R3I5|F6R3I5_BOVIN Uncharacterized protein OS=Bos taurus GN=Bt.49282 PE=4 SV=1	7	7	5.56186	4.57453	5.13497	5.65894	5.18273	5.35066	5.87247	5.52044	5.10202	5.85136	4.81751	4.75071	5.03639	5.22355	5.46193	5.27407	5.61667	4.93868	5.2401	5.33403			0.0812502	1	0.737889	0.335737	2
>sp|Q28133|ALL2_BOVIN Allergen Bos d 2 OS=Bos taurus PE=1 SV=1	6	5	NaN	NaN	NaN	NaN	NaN	4.93376	5.06863	5.0916	5.14323	5.08976	4.49205	4.34286	4.5921	4.5608	4.71163	4.20017	4.98744	4.9173	5.14566	5.42297			0.127249	1	1.54625	0.0977886	1
>tr|B0JYQ0|B0JYQ0_BOVIN ALB protein OS=Bos taurus GN=ALB PE=2 SV=1	91	5	5.04646	5.45968	5.86794	5.52146	5.70243	5.63063	5.5076	5.83236	5.20596	5.63022	5.51322	5.75739	5.91155	5.85452	5.58425	5.36851	5.21945	5.80236	5.64416	5.44273			1.18481	1	0.343346	0.587294	1
>sp|P30932|CD9_BOVIN CD9 antigen OS=Bos taurus GN=CD9 PE=2 SV=2	7	7	6.55912	5.8425	5.45647	6.08732	4.76278	3.51639	NaN	5.52336	NaN	NaN	3.63798	NaN	NaN	4.99509	6.21221	6.2351	3.78902	NaN	5.18336	5.44523			0.0200498	1	0.296462	0.628802	1
>tr|Q58DP6|Q58DP6_BOVIN Ribonuclease, RNase A family, 4 OS=Bos taurus GN=RNASE4 PE=2 SV=1;>sp|P15467|RNAS4_BOVIN Ribonuclease 4 OS=Bos taurus GN=RNASE4 PE=1 SV=4	4	4	5.78089	5.04528	5.40497	5.78277	5.91393	5.73969	5.6158	5.67191	5.34054	5.78742	4.88615	5.42695	4.91556	5.27974	5.39136	5.34633	5.82782	5.5906	5.67482	5.56922			0.0884144	1	1.4213	0.11474	2
>sp|Q2KJF1|A1BG_BOVIN Alpha-1B-glycoprotein OS=Bos taurus GN=A1BG PE=1 SV=1	9	9	5.86079	4.54188	5.05683	5.45442	5.23106	5.3201	5.5972	5.55341	5.08142	5.60977	4.90856	5.16593	5.17733	5.40401	5.16991	5.68685	5.79052	5.62961	5.5056	5.6421			0.00995003	1	1.17572	0.171793	1
>sp|Q3ZBZ1|CAB45_BOVIN 45 kDa calcium-binding protein OS=Bos taurus GN=SDF4 PE=2 SV=1;>tr|F1MKI5|F1MKI5_BOVIN Uncharacterized protein (Fragment) OS=Bos taurus GN=SDF4 PE=4 SV=2	7	7	5.84771	5.01687	5.37035	5.59385	5.51116	5.70178	5.57824	5.55824	5.2619	5.64022	5.3115	5.34657	5.15512	5.60902	5.47395	5.32703	5.63594	5.40475	5.51129	5.73585			0.140567	1	0.214397	0.739059	2
>sp|P26201|CD36_BOVIN Platelet glycoprotein 4 OS=Bos taurus GN=CD36 PE=1 SV=5	12	12	6.66475	5.74512	5.68649	6.4506	4.7473	4.42057	4.54212	5.60233	4.14993	3.9628	4.29756	3.59223	3.63766	5.28974	6.4941	6.52072	4.14389	3.71332	5.48828	5.78202			0.128419	1	0.750316	0.331704	4
>tr|F1N5M2|F1N5M2_BOVIN Uncharacterized protein OS=Bos taurus GN=Bt.53584 PE=4 SV=2	28	1	6.25091	5.45782	5.97066	6.1514	5.92177	6.13988	6.23282	6.19036	5.84631	6.40126	5.74514	5.69643	5.8809	5.99296	5.72079	5.94431	5.9967	5.96562	5.99177	5.97923			0.0672599	1	1.14104	0.176213	1
>tr|B0JYN6|B0JYN6_BOVIN Alpha-2-HS-glycoprotein OS=Bos taurus GN=AHSG PE=2 SV=1;>sp|P12763|FETUA_BOVIN Alpha-2-HS-glycoprotein OS=Bos taurus GN=AHSG PE=1 SV=2	13	13	6.10133	5.61835	5.83058	6.25722	6.04603	6.12136	6.16334	6.12146	5.89865	6.23892	5.78417	5.87103	5.90106	6.03346	6.08329	5.93233	6.19791	5.63243	5.87299	6.04187			0.272958	1	0.376672	0.555447	3
>tr|A7E340|A7E340_BOVIN Mucin 15, cell surface associated OS=Bos taurus GN=MUC15 PE=2 SV=1;>tr|E1BGW1|E1BGW1_BOVIN Uncharacterized protein OS=Bos taurus GN=MUC15 PE=4 SV=2;>sp|Q8MI01|MUC15_BOVIN Mucin-15 OS=Bos taurus GN=MUC15 PE=1 SV=1	5	5	6.4775	5.77114	5.70442	6.4086	5.16164	5.06978	5.00698	6.03571	4.76971	4.80651	5.02723	4.87599	4.7985	5.4869	6.4492	6.53758	5.46258	4.98763	5.63576	6.07254			0.0541229	1	0.738973	0.335737	3
>sp|Q9MZ06|FGFP1_BOVIN Fibroblast growth factor-binding protein 1 OS=Bos taurus GN=FGFBP1 PE=1 SV=1;>tr|Q4VS17|Q4VS17_BOVIN FGFBP (Fragment) OS=Bos taurus PE=4 SV=1	12	12	6.13922	5.44562	5.87942	5.87967	5.86392	5.8641	6.06322	5.96411	5.74426	6.1926	5.59928	5.61624	5.74935	5.92198	5.97584	5.88074	6.00178	5.83805	5.99224	6.09269			0.169534	1	0.533067	0.455846	2
>tr|Q3T101|Q3T101_BOVIN IGL@ protein OS=Bos taurus GN=IGL@ PE=2 SV=1;>tr|A6H7J7|A6H7J7_BOVIN Putative uncharacterized protein OS=Bos taurus PE=2 SV=1	12	2	6.34936	6.54198	6.44226	6.40382	6.29831	6.48047	4.21283	6.37081	6.37842	6.43313	6.05108	6.04618	6.169	6.36899	6.36143	6.36771	6.18267	6.20677	6.19106	6.14557			0.372092	1	0.211807	0.739483	2
>sp|P01888|B2MG_BOVIN Beta-2-microglobulin OS=Bos taurus GN=B2M PE=1 SV=2;>tr|Q862Q3|Q862Q3_BOVIN Similar to beta 2-microglobulin (Fragment) OS=Bos taurus PE=2 SV=1	3	3	6.54868	5.98087	6.20766	6.5187	6.57249	6.55957	6.45185	6.20044	6.22316	6.41639	6.09061	5.96405	5.73672	6.132	6.16708	5.93035	6.07686	6.23507	6.23401	6.20183			0.297961	1	1.70068	0.0769373	2
>tr|G3N0V0|G3N0V0_BOVIN Uncharacterized protein (Fragment) OS=Bos taurus GN=Bt.97040 PE=4 SV=1	9	9	6.94527	6.55294	6.75239	6.47205	6.59234	6.34805	6.55867	6.66337	6.34299	6.27295	6.29911	6.15229	6.18147	6.45503	6.1653	6.20588	6.50515	6.37042	5.60658	6.2577			0.0216594	1	1.77278	0.0674969	1
>sp|O46375|TTHY_BOVIN Transthyretin OS=Bos taurus GN=TTR PE=1 SV=1	5	5	6.83984	5.60375	5.67385	6.34627	6.0389	6.25534	6.38207	6.07445	6.08493	6.42047	5.99106	6.13975	6.19879	6.3803	6.06651	6.50783	6.41544	5.96192	5.97456	6.35154			0.416676	1	0.0699138	0.902208	1
>tr|F1MIW8|F1MIW8_BOVIN Uncharacterized protein OS=Bos taurus GN=DSG1 PE=3 SV=2;>sp|Q03763|DSG1_BOVIN Desmoglein-1 OS=Bos taurus GN=DSG1 PE=1 SV=1	2	2	3.6641	2.62888	NaN	3.60127	3.80751	3.07445	3.95241	3.0023	3.3755	3.53171	3.57085	NaN	3.00535	3.98053	NaN	NaN	3.22884	3.00004	2.91379	NaN			0.546413	1	0.250543	0.68747	2
