# Supplementary material
Source: MDPI journal article supplement (https://www.mdpi.com/2624-862X/3/1/4)
Supplement: s1 [file s1 › Table S3.xlsx]

## Sheet: Blad1
Protein IDs	Majority protein IDs	Gene Name	Protein name	Biological Function	Function 1	Function2	Subcellular Location	Location1	Location2	Ratio H/L normalized LZ047_Bovine_milk_cow_26	Ratio H/L normalized LZ048_Bovine_milk_cow_32	Ratio H/L normalized LZ050_Bovine_milk_cow_38	Ratio H/L normalized LZ051_Bovine_milk_cow_16	Ratio H/L normalized LZ052_Bovine_milk_cow_5349	Ratio H/L normalized LZ053_Bovine_milk_cow_34	Ratio H/L normalized LZ054_Bovine_milk_cow_5611	Ratio H/L normalized LZ056_Bovine_milk_cow_29	Ratio H/L normalized LZ057_Bovine_milk_cow_5728	Ratio H/L normalized LZ058_Bovine_milk_cow_4354	Ratio H/L normalized LZ059_Bovine_milk_cow_5767	Ratio H/L normalized LZ060_Bovine_milk_cow_14	Ratio H/L normalized LZ061_Bovine_milk_cow_5243	Ratio H/L normalized LZ062_Bovine_milk_cow_5805	Ratio H/L normalized LZ063_Bovine_milk_cow_37	Ratio H/L normalized LZ064_Bovine_milk_cow_5356	Ratio H/L normalized LZ065_Bovine_milk_cow_5	Intensity H LZ047_Bovine_milk_cow_26	Intensity H LZ048_Bovine_milk_cow_32	Intensity H LZ050_Bovine_milk_cow_38	Intensity H LZ051_Bovine_milk_cow_16	Intensity H LZ052_Bovine_milk_cow_5349	Intensity H LZ053_Bovine_milk_cow_34	Intensity H LZ054_Bovine_milk_cow_5611	Intensity H LZ056_Bovine_milk_cow_29	Intensity H LZ057_Bovine_milk_cow_5728	Intensity H LZ058_Bovine_milk_cow_4354	Intensity H LZ059_Bovine_milk_cow_5767	Intensity H LZ060_Bovine_milk_cow_14	Intensity H LZ061_Bovine_milk_cow_5243	Intensity H LZ062_Bovine_milk_cow_5805	Intensity H LZ063_Bovine_milk_cow_37	Intensity H LZ064_Bovine_milk_cow_5356	Intensity H LZ065_Bovine_milk_cow_5
P60712;P63258;F1MRD0	P60712	ACTB	Actin, cytoplasmic 1	Cell motility and structuring			Cytoplasm	Cytoskeleton		0.5502	7.2362	1.7613	1.2484	0.52424	0.49107	0.50867	0.79461	0.89414	1.1897	0.58039	1.0347	1.3268	0.80982	0.87801	1.1302	0.82753	10103000	91286000	10493000	50064000	5785600	9787900	11994000	20783000	12220000	9596300	4606800	17431000	51146000	11651000	23568000	27370000	9781300
Q28133	Q28133	BDA20	Allergen Bos d 2	Transport			Secreted			0.34688	0.57909	NaN	NaN	NaN	2.6861	0.21199	NaN	1.3744	NaN	NaN	4.7706	0.53313	0.52332	NaN	NaN	2.6757	1042900	1494700	38477	337610	114420	12904000	1006500	902960	3947900	161280	94590	19265000	1923100	2353800	227030	357380	6829500
P22226	P22226	CATHL1	Cathelicidin-1	Immunity			Secreted			0.42966	0.19712	5.9853	0.40912	0.42916	NaN	0.21397	0.87591	0.24208	0.58138	0.37141	1.5966	2.255	0.52188	0.45194	0.50714	0.74863	3355200	1430100	12161000	3715300	405470	122770	1760400	7101700	467090	2266100	1061000	9894400	22209000	3935800	5585400	4004700	1223400
P33046	P33046	CATHL4	Cathelicidin-4	Immunity			Secreted			0.40142	0.22823	6.0019	NaN	0.26765	0.17821	0.18549	0.87709	0.2935	0.54861	0.42156	1.0099	2.0574	0.35507	NaN	0.45448	0.63419	2245400	538260	9977000	1097000	957210	392000	825670	4802100	183270	1670100	987670	4828700	15543000	1118100	562220	1616900	1796600
P02668	P02668	CSN3	Kappa-casein	Transport			Secreted			1.2973	NaN	1.0584	0.58289	0.61424	0.70835	1.0798	1.0079	1.064	1.4284	0.28289	9.8177	1.136	4.8664	1.5744	1.5888	1.028	207110000	7840400	36522000	264890000	164970000	191640000	392330000	266650000	338430000	114710000	159860000	380920000	364300000	167140000	284400000	342250000	308630000
G5E5V1;G5E5H2	G5E5V1	IGL@ protein		Immunity			Secreted			0.95933	1.295	0.21242	0.3872	1.2391	0.40342	1.7259	2.0511	0.29435	0.83561	0.93477	0.17627	3.6699	0.5731	0.37423	1.0535	2.3249	23133000	98719000	8543600	117390000	44495000	33020000	135900000	177410000	16477000	22035000	22345000	9546200	209570000	7972300	8044700	58992000	70540000
F1MMD7;Q3T052	Q3T052	ITIH4	Inter-alpha-trypsin inhibitor heavy chain H4	Immunity			Secreted			0.64978	1.9558	0.83856	0.78365	0.40613	0.45256	1.7838	0.65913	0.58698	0.65347	0.88494	4.0159	1.1137	0.39714	0.88246	0.72969	0.54917	3469100	21915000	2815900	3527900	1944200	2655900	15919000	5220400	1724100	1706000	3019800	41857000	13393000	37838000	14973000	7846600	1920100
Q0IIA2	Q0IIA2	MGC151921	Odorant-binding protein-like	Transport			Secreted			2.33	0.63442	0.39643	2.7075	0.23605	0.59923	0.056763	3.4014	2.2741	2.651	0.080986	0.11857	1.8824	0.18631	0.31424	0.25618	1.6966	63399000	24615000	2559300	180820000	7352100	22458000	1780300	141440000	78668000	33913000	2184600	2667600	103840000	6848900	11500000	9737800	74707000
Q3SZR3;Q5GN72	Q3SZR3	ORM1	Alpha-1-acid glycoprotein	Transport	Immunity		Secreted			0.44667	1.6312	0.27787	1.0391	0.58123	1.0082	2.5559	0.85478	0.31698	0.36813	0.37171	3.5679	0.28006	0.24107	0.31607	0.78486	0.41175	59215000	213210000	6752500	259080000	45416000	196690000	384530000	115250000	27988000	24660000	26008000	579630000	52536000	26161000	62593000	142490000	27670000
O02853	O02853	PTGDS	Prostaglandin-H2 D-isomerase	Enzyme	Transport	Immunity	Cytoplasm	Membrane	Secreted	2.8347	2.4193	3.519	0.17718	NaN	NaN	NaN	0.56965	NaN	3.3155	NaN	NaN	1.4644	NaN	0.12292	NaN	0.22971	21200000	15778000	8159800	3382900	344130	3619700	1187100	4934800	162220	9139000	73070	1394100	30867000	2039100	1911400	570030	230360
P61823	P61823	RNASE1	Ribonuclease pancreatic	Enzyme	Immunity		Secreted			1.2242	1.1671	NaN	2.1814	0.80191	1.6755	NaN	2.6675	0.95407	0.64019	2.8109	NaN	2.4602	NaN	3.0035	2.875	0.67911	4789300	3716100	0	27143000	1953700	16723000	629740	23076000	3649300	556970	9665900	0	40455000	792290	30762000	28167000	1823400
G8JKX0;P29392	P29392	SPADH1	Spermadhesin-1	Cell division			Secreted			NaN	0.54258	NaN	1.4202	0.20322	0.4284	0.77148	0.60245	0.44429	0.78383	1.0713	3.5598	0.78499	0.49969	NaN	2.3464	1.8459	596920	1471900	0	9458400	673700	1170300	2326600	1920000	1531500	1616300	3539600	12302000	5164700	1723100	1252700	11675000	5402000
Q2KJF1	Q2KJF1	A1BG	Alpha-1B-glycoprotein	Immunity			Secreted			0.85742	1.3438	0.53564	0.81325	1.0771	0.98889	1.6415	1.2593	1.0972	0.78206	1.0833	1.3865	1.1123	0.4886	0.99012	0.91998	0.65177	14168000	32517000	3168700	30354000	5342600	19480000	32508000	16772000	10671000	5867700	6101200	25666000	10924000	11293000	18268000	14269000	2289900
Q7SIH1	Q7SIH1	A2M	Alpha-2-macroglobulin	Protease inhibitor			Secreted			0.86321	1.5654	NaN	0.78689	0.95683	1.2002	0.88189	0.94668	1.0313	NaN	NaN	2.7823	1.7207	0.58071	1.11	1.4155	NaN	690690	2674200	34743	2146900	312530	2137400	1555300	1563800	315510	159490	0	7382400	6888400	1821300	2980000	2097600	130730
P68138;P62739;Q3ZC07;G8JKX4;Q5E9B5;F1MKC4	P68138	ACTA1	Actin, alpha skeletal muscle	Cell motility			Cytoplasm	Cytoskeleton		NaN	NaN	NaN	NaN	NaN	NaN	NaN	NaN	NaN	NaN	NaN	NaN	NaN	NaN	NaN	NaN	NaN	0	24939000	0	0	0	0	0	0	0	0	0	0	0	0	0	0	0
Q3ZC55	Q3ZC55	ACTN2	Alpha-actinin-2	Protein synthesis	Other: bundling protein		Cytoplasm			NaN	NaN	NaN	NaN	NaN	NaN	NaN	NaN	NaN	NaN	NaN	NaN	NaN	NaN	NaN	NaN	NaN	1509600	2543000	4077900	0	901690	0	0	0	0	0	0	0	0	0	0	0	1321200
Q3SZH5	Q3SZH5	AGT	Angiotensinogen	Protease inhibitor	Other: blood pressure		Secreted			0.76662	1.361	NaN	NaN	NaN	NaN	1.3227	NaN	NaN	0.92223	NaN	NaN	NaN	NaN	NaN	NaN	NaN	1490300	1595200	0	0	643970	0	2476600	592050	452190	1016900	0	0	474960	0	0	0	0
P12763	P12763	AHSG	Alpha-2-HS-glycoprotein	Immunity	endocytosis		Secreted			0.70151	1.9508	0.85826	1.0719	1.1316	1.1666	0.92792	1.5199	1.1473	1.2188	1.1075	1.953	1.254	0.63769	0.93607	0.63969	0.51236	23031000	55624000	5704100	55384000	35280000	60144000	34686000	55085000	19451000	14123000	19307000	55784000	59323000	26005000	39706000	31776000	9887400
P02769;CON__sp|P02769|ALBU_BOVIN	P02769	ALB	Serum Albumin	Transport			Secreted			0.74881	1.2769	1.0625	0.93445	1.1037	1.2086	1.0762	1.0199	0.90787	1.0413	0.80142	0.69842	0.7988	0.76674	0.88793	0.81068	0.776	8127400000	10487000000	1921600000	15333000000	6892000000	11312000000	11114000000	9442100000	6034500000	4114200000	6063500000	6130700000	9241200000	8009300000	11675000000	8926500000	4561400000
A6QLL8;Q3ZBY4	A6QLL8	ALDOC	Fructose-bisphosphate aldolase	Enzyme (Glycolysis)			Mitchondrion?			NaN	NaN	NaN	NaN	NaN	NaN	NaN	NaN	NaN	NaN	NaN	1.139	NaN	NaN	NaN	NaN	NaN	0	0	121430	0	0	0	0	0	0	0	0	445270	449680	158150	215450	0	0
P10152;Q2NKV1	P10152	ANG1	Angiogenin-1	Cell	Other: angiogenesis		Secreted	Nucleus		NaN	NaN	NaN	NaN	NaN	NaN	NaN	1.9073	NaN	NaN	NaN	NaN	NaN	NaN	NaN	NaN	NaN	0	739690	51438	1117500	141140	1455900	584350	3444300	563750	314040	309360	336430	920830	0	0	0	139840
Q29437;E1BD43;E1BC10;Q9TTK6;O46406;E1BJN3;G3MX04;E1BC09	Q29437	AOC3	Membrane primary amine oxidase	Cell adhesion	Enzyme		Membrane			NaN	NaN	NaN	NaN	NaN	NaN	1.7701	0.89864	NaN	NaN	NaN	NaN	NaN	NaN	NaN	NaN	NaN	343720	552000	0	0	230150	0	1365400	765200	0	0	0	0	644160	0	0	333010	103390
P15497	P15497	APOA1	Apolipoprotein A-I	Transport	Metabolism		Secreted			1.2437	1.8006	0.5205	1.0525	0.79318	1.4015	1.0806	0.96603	2.0501	1.2212	0.99486	3.6672	1.8404	0.85686	0.71078	0.88724	0.46272	10930000	16378000	672350	7220000	2741000	6451300	9497800	5114500	9203400	2676600	2546000	21560000	12651000	2278100	4894700	2897800	980920
F1N3Q7;Q32PJ2	Q32PJ2	APOA4	Apolipoprotein A-IV	Transport			Secreted			1.2409	1.2976	0.2886	1.0641	1.1968	1.2507	0.95459	0.89245	1.4331	0.91372	1.3206	0.88683	1.7057	0.95533	0.63743	0.51126	0.79276	7231100	13887000	998080	14645000	7162500	15853000	10681000	8462500	9088700	4088500	5626400	5091000	19314000	5516700	4868800	4077300	4160200
Q03247	Q03247	APOE	Apolipoprotein E	Transport			Secreted			0.7904	1.1296	NaN	0.9966	0.5709	0.52338	0.37597	1.0267	0.85596	1.483	0.829	1.5607	4.4463	0.45523	0.94208	1.4746	0.7507	4696300	7297600	198270	9038700	2980100	3551500	2197600	8195200	4162600	6873800	3101700	9584600	46988000	2949500	6588900	9965200	899440
P17690	P17690	APOH	Beta-2-glycoprotein 1	Blood coagulation	Other: preventing blood coagulation		Secreted			1.3604	1.463	NaN	1.3074	0.8268	1.3054	1.1464	1.4624	1.24	1.0428	0.92201	1.0715	1.3917	0.88765	1.6188	1.2317	0.96008	5355400	10078000	0	16976000	4008000	11081000	12622000	13625000	4263600	2197300	3907000	6411600	12279000	4877100	11677000	7886100	4095200
E1BP90;O46382;E1BKI9	O46382	ARFGEF1	Brefeldin A-inhibited guanine nucleotide-exchange protein 1	Transport			Cytoplasm	Membrane	Nucleus	NaN	NaN	NaN	NaN	NaN	NaN	NaN	NaN	NaN	NaN	NaN	NaN	NaN	NaN	NaN	NaN	NaN	0	0	0	0	0	0	0	0	0	0	0	0	0	0	0	0	0
Q3ZCH5	Q3ZCH5	AZGP1	Zinc-alpha-2-glycoprotein	Immunity			Secreted			0.94823	1.1951	0.45102	1.0465	1.7568	0.74863	0.68531	1.4666	1.2284	1.1698	1.5191	0.60735	1.3698	0.58848	1.1304	0.67537	1.0698	245150000	262400000	18150000	409930000	223560000	236350000	171740000	346970000	170950000	154400000	202500000	129480000	237310000	151350000	367130000	179490000	94264000
P01888	P01888	B2M	Beta-2-microglobulin	Immunity			Secreted			0.73398	1.6952	0.19532	0.96661	1.3339	1.1326	0.66745	1.6147	1.1398	1.4752	0.94734	0.44578	2.1024	0.43823	0.9123	0.75738	1.4521	9817000	33525000	820150	53278000	30178000	28582000	17707000	70824000	49535000	7502300	59095000	4477500	65802000	5368000	4812100	15012000	36647000
P08037	P08037	B4GALT1	Beta-1,4-galactosyltransferase 1	Enzyme	Other: transferase		Cell membrane, Golgi apparatus	Membrane	Secreted	1.0861	1.5076	0.41983	1.1882	1.0632	1.284	1.0328	1.0773	1.3116	1.204	1.1834	0.77497	1.2126	1.1991	1.0363	1.2931	1.3049	74924000	96625000	8039000	139090000	53053000	79585000	75164000	53276000	55082000	38173000	51144000	49740000	85625000	65266000	83008000	78677000	33606000
P21809	P21809	BGN	Biglycan	Other: collagen assembly			Secreted	Secreted		NaN	NaN	NaN	NaN	NaN	NaN	NaN	NaN	NaN	NaN	NaN	2.6372	NaN	NaN	NaN	NaN	NaN	577370	422050	0	1703300	277200	185050	0	475420	0	533780	231470	1657400	0	0	461520	1161000	93110
P18892;E1BHI7;E1BQ22	P18892	BTN1A1	Butyrophilin subfamily 1 member A1	Transport	Immunity		Membrane			1.4918	0.78868	0.51697	0.83558	0.75156	1.0304	0.87873	0.65738	0.95955	1.3434	1.4045	0.60919	0.78241	0.96853	1.4266	3.3604	1.0898	96681000	31649000	3800000	69191000	14870000	70720000	48652000	29355000	12235000	20349000	35960000	24006000	35904000	43275000	135060000	105240000	15872000
Q2UVX4;G3X7A5;CON__sp|P12247|CO3_RABIT	Q2UVX4	C3	Complement C3	Immunity			Secreted			0.75211	1.4031	0.76532	0.97019	0.95902	0.71762	1.0907	0.98634	0.78928	1.1319	0.81415	1.5622	1.3484	1.0546	0.84927	1.0995	0.77334	302070000	648340000	103300000	768680000	279290000	333330000	491090000	419530000	205930000	210740000	198820000	674730000	724770000	465260000	436960000	516380000	174980000
F1MM86;Q29RU4	Q29RU4	C6	Complement component C6	Immunity			Secreted			NaN	NaN	NaN	NaN	NaN	NaN	0.35907	NaN	NaN	NaN	NaN	1.4535	NaN	NaN	1.3229	NaN	NaN	207630	0	0	21000000	0	13491000	1534400	7517900	0	0	0	10490000	0	22848000	29366000	14634000	0
F1N045;Q29RQ1	Q29RQ1	C7	Complement component C7	Immunity			Membrane			1.6687	0.71972	0.32307	0.58547	1.179	1.0459	1.5377	1.3265	1.5583	1.4742	0.57272	2.2303	1.5702	0.34249	1.5279	0.28274	1.2314	10807000	5382600	160510	1523100	4143600	2763200	12288000	9008500	4304000	4098000	737930	7298300	11784000	592660	6033700	851150	2740800
Q3MHN2	Q3MHN2	C9	Complement component C9	Immunity			Cell membrane	Membrane	Secreted	1.0107	1.4053	0.41198	1.0392	1.4639	0.94165	1.8653	1.1519	1.2074	0.77522	0.9873	1.5529	1.4516	1.0215	1.6051	1.3338	0.84068	4860400	16899000	579970	16295000	10438000	14361000	19933000	12655000	7975600	3536600	6649200	8664300	20477000	6742000	19362000	10878000	4275500
Q3SZX4	Q3SZX4	CA3	Carbonic anhydrase 3	Enzyme			Cytoplasm			NaN	NaN	NaN	NaN	NaN	NaN	NaN	NaN	NaN	NaN	NaN	NaN	NaN	NaN	NaN	NaN	NaN	0	6819400	0	0	0	0	0	0	0	0	0	0	0	0	0	0	0
P19660;E1BL84	P19660	CATHL2	Cathelicidin-2	Immunity			Secreted			0.48628	NaN	6.0787	NaN	NaN	NaN	NaN	1.0411	NaN	NaN	NaN	NaN	1.8558	NaN	NaN	NaN	NaN	680570	0	1382100	335050	0	0	0	708670	0	254350	0	514110	3714000	0	0	0	259470
P54228	P54228	CATHL6	Cathelicidin-6	Immunity			Secreted			NaN	NaN	4.9061	NaN	NaN	NaN	NaN	NaN	NaN	NaN	NaN	1.0982	NaN	NaN	NaN	NaN	NaN	146850	0	1662300	0	0	0	0	0	0	0	0	622670	716740	0	0	0	0
F1MPE1	F1MPE1	CD109		Protease inhibitor			Secreted			NaN	NaN	NaN	NaN	1.8976	NaN	1.0172	NaN	NaN	NaN	NaN	NaN	NaN	NaN	2.8982	NaN	1.7092	531360	476120	0	0	639870	0	518770	0	408430	255000	0	0	0	0	5640800	0	325260
A6QNL0;Q95122	Q95122	CD14	Monocyte differentiation antigen CD14	Immunity			Cell membrane	Membrane		0.75731	1.0544	0.39435	0.87882	1.0471	1.1512	1.0661	1.2335	1.3989	1.028	1.2218	0.68843	0.81131	1.0374	1.0233	1.1196	1.2593	13194000	15671000	1301700	22414000	6928600	22039000	18660000	20941000	9025700	6010800	5643600	8429600	16595000	17915000	25405000	14965000	7335300
P26201;F1ML83	P26201	CD36	Platelet glycoprotein 4	Cell adhesion	Transport		Membrane			NaN	1.1028	NaN	NaN	NaN	NaN	NaN	NaN	NaN	NaN	1.7833	NaN	NaN	0.29527	4.4343	12.213	NaN	0	1515400	74914	494820	0	0	938670	393660	142970	0	2238600	163500	433630	1074000	13813000	49778000	0
Q32PA1	Q32PA1	CD59	CD59 molecule, complement regulatory protein	Immunity			Membrane			0.84057	1.0517	0.47523	0.93073	1.1616	0.94219	0.62555	1.1718	0.74307	0.67618	0.87905	1.2163	1.2403	0.83964	1.4765	1.5695	0.92811	3224100	5530100	404130	7026500	4739800	3231700	3745500	6568300	4420700	2630700	5338600	1982400	10143000	3208800	7179900	7153600	6197300
F1N514	F1N514	CD5L		Other-receptor			membrane			1.5291	1.9924	0.73359	0.58923	0.90578	0.89163	0.7988	1.1502	1.074	1.1895	0.50748	1.4637	2.4709	1.1014	0.50048	0.79671	0.69587	13923000	13366000	1034400	6912300	4218500	6525500	5325100	8242600	3488400	4296500	1661200	9632900	28687000	6091300	2896900	5947700	1572000
F1N4M7	F1N4M7	CF1		Enzyme			membrane			1.1586	1.4121	0.60501	0.88225	0.86639	0.44079	1.0197	1.0435	1.2706	1.1847	0.72894	1.2612	2.7681	0.51958	1.2336	0.99213	0.70579	6348400	9412900	411600	5798400	2575700	1969400	4933400	2734700	3515300	2638900	1865100	6157900	11708000	1216100	7303700	2126100	1473400
P81187	P81187	CFB	Complement factor B	Immunity			Secreted			1.0038	1.6817	0.5608	0.99753	1.0611	0.67746	1.3365	0.97059	0.89052	0.95729	0.98888	1.4058	1.1471	0.50903	1.1195	0.8394	0.81724	18319000	20000000	3596800	25971000	9212100	10370000	30789000	16822000	8365700	9155700	6142800	22494000	21809000	6002100	12375000	14300000	4578100
Q3T0A3	Q3T0A3	CFD	Complement factor D	Immunity			Secreted			NaN	NaN	NaN	NaN	1.1832	2.1191	0.97961	NaN	2.3169	0.76219	NaN	NaN	1.1945	1.3507	2.2071	1.7979	NaN	69496	184700	85289	0	200010	568490	48135	52567	1649100	328800	255810	266280	363060	1204100	310190	263600	252220
Q28085	Q28085	CFH	Complement factor H	Immunity			Secreted			1.5548	NaN	0.38407	NaN	0.9337	NaN	0.88892	NaN	NaN	1.3605	NaN	2.035	1.7405	NaN	NaN	NaN	0.71505	1622800	0	177360	0	1359000	0	2399100	367530	179860	309210	0	3880900	1684000	0	322060	256270	326420
G3X7D2;P30922	P30922	CHI3L1	Chitinase-3-like protein 1	Immunity	Other		Secreted			NaN	1.3473	NaN	NaN	NaN	0.43998	NaN	1.2347	NaN	1.9007	0.79215	1.5387	2.6483	NaN	NaN	1.2736	NaN	0	2394300	36217	1581100	0	409510	0	2999700	214240	1949600	637410	3623300	12648000	164500	858990	1125000	0
Q2KIS7	Q2KIS7	CLEC3B	Tetranectin	Other			Secreted			0.85829	1.1847	0.71266	1.167	0.88652	1.0555	0.64097	0.83533	1.6162	1.021	0.45303	0.8858	1.3122	1.3976	1.3658	0.75999	2.0574	5704100	8319000	1274700	15698000	3981200	10141000	3783700	6216900	6917500	3409700	2316100	5098900	15975000	9401800	14516000	6422100	7849900
P17697	P17697	CLU	Clusterin	Immunity			Cytoplasm, Cytoplasmic vesicle, ER	Membrane, microsome, mitochondrion	Nucleus, secreted	0.70473	1.2892	0.43774	1.5444	0.93019	0.53685	0.29144	0.92598	0.49942	2.4706	0.67773	1.3437	2.4244	0.77735	1.3404	1.3792	0.53337	12696000	37122000	1429400	27450000	7788700	8668900	2872100	17441000	4645800	24738000	7562600	47334000	72033000	11262000	30406000	25849000	3308200
F1N076	F1N076	CP		Transport			Secreted			1.2291	1.8117	0.57443	0.85956	0.98483	0.74981	1.4827	0.82039	0.77391	0.67419	1.1364	2.0831	1.2332	0.46183	1.12	0.87069	0.82977	6464400	15968000	1060900	6137900	5282400	4627400	14415000	5590300	4935000	2464000	5634800	16861000	3597200	1214600	9706400	5431600	3179900
F1MX50	F1MX50	CREG1		Protein synthesis			Unknown			1.6473	2.5764	0.57548	0.6258	0.56716	1.0612	1.3156	2.1495	0.73555	0.89991	0.53814	NaN	NaN	1.3911	0.73271	1.9748	NaN	5845800	24610000	1302500	13229000	2663300	9784300	14781000	18268000	2679600	3192800	3007700	905540	6263600	14121000	16431000	22678000	1041500
F6R3I5	F6R3I5	CRISP3		Unknown			Secreted			0.85619	1.7082	0.48363	1.7331	1.1817	1.6092	1.065	1.0392	1.1157	1.067	0.90177	2.8149	1.8508	0.97645	1.0079	0.91184	0.56657	27010000	43822000	3289500	85055000	33496000	49966000	22973000	30784000	52799000	8434500	72769000	50857000	40433000	19692000	18833000	14395000	25057000
P02662	P02662	CSN1S1	Alpha-S1-casein	Transport			Secreted			0.75945	0.57777	0.50202	0.75124	0.53898	0.46549	0.77668	0.74267	0.81252	1.4506	0.55716	1.3348	1.0076	1.1215	1.5882	1.8493	0.88845	244560000	671950000	97300000	501070000	78522000	644200000	803060000	289110000	1030600000	298850000	473830000	658660000	352110000	626900000	1343800000	599020000	751400000
P02663	P02663	CSN1S2	Alpha-S2-casein	Transport	Immunity		Secreted			1.0269	0.72899	0.48747	0.86252	0.49908	0.49211	0.63115	0.71389	0.4293	1.9564	0.8008	1.4259	1.7749	0.56748	1.1072	1.0015	0.64518	214390000	136270000	48991000	256110000	71774000	79677000	115690000	128390000	56052000	337830000	58040000	228490000	429210000	94508000	266260000	208250000	70959000
P02666	P02666	CSN2	Beta-casein	Transport			Secreted			0.96716	1.6748	2.2165	0.95606	0.89306	0.73907	0.40863	0.68662	0.83487	1.7094	0.2424	3.4415	0.63662	1.1719	1.2215	1.1211	1.0611	1455800000	3867900000	496040000	3480900000	704650000	1042900000	1529200000	2516800000	967920000	1292200000	477180000	1532600000	2354300000	2425400000	2347100000	2401200000	648990000
P01035	P01035	CST3	Cystatin-C	Protease inhibitor			Secreted			NaN	NaN	NaN	NaN	NaN	1.1568	NaN	NaN	NaN	NaN	NaN	NaN	NaN	NaN	NaN	NaN	NaN	633610	1689200	0	0	701550	1408900	0	1215500	478720	369070	616430	2792300	1827400	1098200	0	2107800	0
P07688	P07688	CTSB	Cathepsin B	Enzyme			Secreted	Lysosome		NaN	NaN	NaN	NaN	NaN	NaN	NaN	NaN	NaN	1.0018	NaN	NaN	NaN	1.4746	NaN	NaN	NaN	435560	0	72011	2486200	210160	1394500	799230	0	0	1059800	0	683580	1705700	1818800	2404800	541250	0
A4IFS7	A4IFS7	CTSL1	Cathepsin L1	Enzyme (protease)			Lysosome			0.99645	1.3666	NaN	NaN	NaN	1.5116	1.5909	NaN	0.99575	0.87835	1.2819	NaN	0.8873	1.1051	1.7823	1.7743	1.4134	3682900	5824600	138250	932750	1366500	1932000	4576500	863080	2076500	2321100	1589100	2494500	4122700	3167900	9245700	8512900	1998000
P25975;Q5E998	P25975	CTSL1	Cathepsin L1	Enzyme (protease)			Lysosome			1.5053	1.3092	NaN	1.34	1.0582	1.5758	0.9064	NaN	0.81822	1.0868	1.2192	NaN	1.2775	NaN	1.0095	2.0065	NaN	1477500	771450	110930	1640300	552800	1068300	1188000	0	399210	503790	596990	488770	1664000	0	1181500	1452700	104000
F1MW68;P05689	P05689	CTSZ	Cathepsin Z	Enzyme (protease)			Lysosome			1.0996	1.0814	0.4288	1.1015	NaN	2.1119	0.8247	0.81924	NaN	1.2097	NaN	0.65292	1.2305	1.6729	1.7256	1.273	NaN	1692400	3919500	287430	5141500	900310	2982200	1766200	1760900	1280500	1243700	636380	1626900	2790500	5463000	7462800	5499800	652900
F1N5T0;P69678;F1MTI7	P69678	CUTA	Protein CutA	Protein synthesis			Membrane			NaN	NaN	NaN	NaN	NaN	NaN	NaN	NaN	NaN	NaN	1.382	NaN	NaN	NaN	NaN	NaN	NaN	447880	0	0	927640	0	0	0	0	0	0	721100	0	0	458860	948010	0	0
F1N7D7;O18738	O18738	DAG1	Dystroglycan	Cell adhesion			Cell membrane	Cytoskeleton	Secreted	0.9643	1.3635	0.42302	NaN	1.2302	1.0222	1.2502	1.5538	0.9171	0.99808	1.4789	1.2791	1.2158	0.71404	1.0328	1.1568	1.2607	2101700	11090000	711780	5854300	3871900	4865200	11024000	6160700	6090100	3336900	3630300	5716800	14713000	4747500	7335000	7257500	4069600
F1N036;Q27968	Q27968	DNAJC3	DnaJ homolog subfamily C member 3	Protein synthesis			Endoplasmatic Reticulum			NaN	NaN	NaN	0.84448	NaN	NaN	0.65211	NaN	NaN	NaN	1.2784	1.7141	1.4504	0.65821	1.5251	1.4561	1.1108	483320	519210	0	1513300	0	0	816440	304810	0	0	589810	1158200	1501500	647010	2257700	2214400	348450
F1MIW8;Q03763	Q03763	DSG1	Desmoglein-1	Cell adhesion			Membrane	Cell membrane		NaN	NaN	NaN	7.2729	NaN	NaN	NaN	NaN	NaN	NaN	NaN	NaN	NaN	NaN	NaN	NaN	NaN	0	0	0	9994900	0	0	0	0	0	0	0	0	0	0	0	0	0
E1BKT9	E1BKT9	DSP		Cell			membrane	Mitochondrion		NaN	NaN	NaN	8.4918	NaN	NaN	NaN	NaN	NaN	NaN	NaN	NaN	NaN	NaN	NaN	NaN	NaN	0	0	0	11690000	0	0	0	0	0	0	0	0	0	0	0	0	0
F1MB08;Q9XSJ4	Q9XSJ4	ENO1	Alpha-enolase	Enzyme			Cell membrane	Membrane	Cytoplasm	NaN	0.97651	1.5421	NaN	NaN	NaN	NaN	NaN	NaN	1.0245	NaN	1.1818	NaN	NaN	NaN	1.0527	NaN	192260	1919500	656210	0	0	0	0	357530	281430	1048300	0	538300	711770	0	389930	849130	130460
Q3ZC09;A6QR19	Q3ZC09	ENO3	Beta-enolase	Enzyme	Glycolysis		Cytoplasm			NaN	NaN	NaN	NaN	NaN	NaN	NaN	NaN	NaN	NaN	NaN	NaN	NaN	NaN	NaN	NaN	NaN	0	3496900	0	0	0	0	0	0	0	0	0	0	0	0	0	0	0
G8JKZ1;P15396	P15396	ENPP3	Ectonucleotide pyrophosphatase/phosphodiesterase family member 3	Enzyme			Membrane	Secreted		NaN	NaN	NaN	NaN	NaN	NaN	NaN	NaN	NaN	NaN	NaN	NaN	NaN	NaN	NaN	NaN	NaN	0	0	0	0	0	0	0	0	0	0	0	0	0	0	0	2439800	0
P00735	P00735	F2	Prothrombin	Immunity	Blood coagulation		Secreted			1.3206	1.3353	0.40103	0.98553	1.0987	0.88947	1.0648	1.0111	0.90521	0.85404	1.1948	1.4197	1.287	0.75693	1.0181	1.1754	0.89441	10855000	13587000	647570	17129000	6171300	8614900	13170000	10049000	4145000	2869300	4947000	8243100	11421000	4864100	7650400	13671000	3258200
P10790;F1MHQ4;P48035;P02690	P10790	FABP3	Fatty acid-binding protein, heart	Transport			Cytoplasm	Mitochondrion		1.2998	1.8582	0.76316	1.1083	1.2498	1.148	1.1382	0.6825	0.9256	1.1865	1.3624	0.6963	0.6126	1.1747	0.91239	1.4648	1.0862	195560000	250440000	55295000	481580000	132760000	259780000	190820000	116360000	90682000	112400000	119200000	136410000	112440000	180040000	248050000	229980000	96560000
Q58D62	Q58D62	FETUB	Fetuin-B	Protease inhibitor			Secreted			NaN	4.3439	NaN	NaN	NaN	NaN	NaN	NaN	NaN	NaN	NaN	4.7439	NaN	NaN	NaN	NaN	NaN	175180	4034000	0	2422500	445440	487900	0	0	556760	216330	539020	4281100	14652	827210	0	0	0
A5PJE3;P02672	P02672	FGA	Fibrinogen alpha chain	Blood coagulation			Secreted			1.1801	1.5339	0.77826	0.7153	0.96964	0.81496	1.7509	0.84015	1.191	0.88027	0.58026	1.6316	1.2781	0.51765	1.2275	0.69842	0.77098	26503000	35293000	4073900	20438000	9898500	18897000	47397000	20911000	12891000	10579000	5159100	34266000	40048000	13072000	39342000	19889000	5022800
F1MAV0;P02676	P02676	FGB	Fibrinogen beta chain	Blood coagulation			Secreted			1.2549	1.8319	0.71381	0.58498	0.94044	0.96575	1.9197	0.84482	0.92547	0.76228	0.52753	2.7194	1.2315	0.6374	1.3311	0.88758	0.78042	15119000	21568000	2266800	9274900	9246800	11502000	29652000	11120000	7038500	3572700	3265600	36409000	26712000	5812900	17326000	15230000	2899900
Q9MZ06	Q9MZ06	FGFBP1	Fibroblast growth factor-binding protein 1	Cell proliferation	Other: angiogenesis		Cell Membrane	Membrane	Secreted	0.71125	0.95724	0.66998	0.81779	0.81306	1.0789	0.72916	1.5427	1.178	0.86724	1.1264	0.91378	1.6412	1.1109	0.83919	1.3649	1.1053	18806000	53787000	4818000	71718000	35353000	67520000	52696000	66121000	47330000	10118000	36480000	42857000	164700000	68341000	37127000	86379000	30014000
F1MGU7;Q3SZZ9;P12799	P12799	FGG	Fibrinogen gamma-B chain	Blood coagulation			Secreted			1.2796	1.4426	0.69571	0.67734	0.90647	0.7913	1.5009	0.98307	1.2321	1.0524	0.79636	1.5324	1.233	0.7671	1.1505	0.78885	0.96019	40458000	31366000	3576600	23653000	12588000	12515000	32579000	16057000	20315000	9431100	9315100	28745000	45123000	13856000	29983000	18124000	6394800
CON__sp|P07589|FINC_BOVIN;G5E5A9;P07589;B8Y9S9;B8Y9T0	P07589	FN1	Fibrinonectin	Cell adhesion	Immunity		Secreted	Extracellular matrix		1.5251	1.1427	0.3472	0.70754	0.86281	1.0553	0.87709	1.3891	1.0609	1.6193	0.67336	1.2141	2.4163	0.41922	0.77461	0.97577	0.91599	3165600	2602400	95843	1561800	753310	2045800	1868300	5043300	1386200	2709700	291410	3159000	12069000	536490	2381600	3038400	1108000
F1MBN5;P02702;Q0VCN9;E1BJL8	P02702	FOLR1	Folate receptor alpha	Transport			Unknown			0.57047	0.75599	0.81494	0.97704	1.0068	1.0955	1.035	1.2524	1.8959	1.2776	0.80166	0.66282	0.95046	1.1674	1.1249	1.3926	1.1953	34370000	27794000	8044600	100120000	20734000	85015000	84152000	84905000	46402000	43035000	13369000	12799000	70398000	60709000	120070000	92863000	34745000
P50291	P50291	FST	Follistatin	signalling	Other: Hormone inhibition)		Secreted			NaN	1.1182	NaN	NaN	NaN	NaN	NaN	NaN	1.514	NaN	1.7246	NaN	NaN	NaN	NaN	NaN	NaN	0	911260	0	462950	271070	880230	728080	583770	1237400	562880	1154900	0	560580	317700	221030	612770	116290
P10096;Q2KJE5	P10096	GAPDH	Glyceraldehyde-3-phosphate dehydrogenase	Enzyme	Glycolysis		Cytoplasm	Nucleus		NaN	20.204	NaN	NaN	NaN	NaN	NaN	NaN	NaN	NaN	NaN	NaN	NaN	NaN	NaN	NaN	NaN	0	11520000	0	0	0	0	0	0	0	0	0	0	0	0	0	0	0
F1N5M2;Q3MHN5	Q3MHN5	GC	Vitamin D-binding protein	Transport			Secreted			0.78878	1.0451	0.53239	1.0972	0.84975	1.2595	1.2213	1.0444	0.9552	0.84892	0.97675	0.83965	1.0695	0.82272	1.0418	1.0591	0.56074	38676000	74473000	6746400	130280000	54597000	82228000	107690000	87593000	47493000	23874000	50700000	48433000	110120000	45319000	87395000	88546000	22009000
P50397	P50397	GDI2	Rab GDP dissociation inhibitor beta	Transport			Cytoplasm	Membrane		NaN	NaN	0.69199	1.2417	NaN	NaN	NaN	NaN	1.7406	1.3189	0.87345	NaN	NaN	NaN	NaN	NaN	NaN	976800	910740	260960	3519000	738990	0	1151500	1057900	1299800	1403700	710860	243660	0	1049100	2106700	1415000	254220
G3N2D8	G3N2D8	GGT1		Enzyme			Unknown			NaN	0.84333	NaN	NaN	0.88217	NaN	0.98229	NaN	1.296	NaN	1.5418	0.75656	1.203	0.74457	NaN	3.9196	0.80133	283870	681450	0	0	811440	593410	1012400	740050	1119900	285600	939610	327820	1494900	533190	802580	7387500	635340
E1BDY3;G3N2K4	G3N2K4	GLG1		Protein synthesis			Golgi apparatus			NaN	NaN	NaN	1.3784	NaN	NaN	NaN	1.6612	NaN	NaN	1.1905	NaN	1.4616	NaN	NaN	1.6802	1.4217	152930	347660	0	1308600	272820	931820	475490	1275100	460270	0	584650	0	1058000	468640	222610	1096100	772610
P80195	P80195	GLYCAM1	Glycosylation-dependent cell adhesion molecule 1	Unknown			Membrane	Peripheral membrane		0.97894	2.4143	1.8927	1.2286	1.2796	0.8796	2.0247	1.3003	0.72613	0.70753	0.80278	5.2791	1.929	1.8524	1.2859	0.4737	0.66892	240110000	373780000	62281000	448360000	139600000	242320000	430860000	248050000	67330000	47708000	123380000	553360000	353300000	282760000	303100000	126090000	91443000
Q58CS8	Q58CS8	GNPTG	N-acetylglucosamine-1-phosphotransferase subunit gamma	Enzyme	Other: substrate recognition		Secreted	Golgi Apparatus		NaN	NaN	NaN	2.277	NaN	NaN	NaN	1.8563	2.0733	NaN	1.7425	NaN	1.3143	NaN	1.05	NaN	NaN	152910	339030	93454	2608000	0	0	293850	1414900	1077400	108340	679430	211570	872370	425010	1564500	228910	0
F1N726	F1N726	GP2		Immunity			Secreted			1.0474	1.5334	0.53118	1.2937	1.3346	1.2121	1.1403	0.98908	0.51495	0.95008	0.85998	1.4891	0.81033	1.1929	1.8479	0.59229	1.4107	53699000	67867000	5816300	99387000	40547000	49384000	58246000	46788000	12336000	15346000	18939000	50169000	41320000	57356000	91428000	29818000	34352000
F1N1I6;F1MJH1;Q3SX14	Q3SX14	GSN	Gelsolin	Other: binding	Cilium biogenesis/degradation		Cytoplasm	Cytoskeleton		0.87293	1.3159	0.34473	0.96982	0.95383	1.5254	1.0352	0.97079	1.2866	0.98108	0.77216	1.0776	1.5335	0.80752	1.2962	0.87194	0.98386	3299200	11832000	356240	14987000	4871200	8958800	10454000	5551400	10635000	4198600	2999200	6346100	21247000	5558700	8486600	7005700	3734700
Q2TBU0;G3X6K8	Q2TBU0	HP	Haptoglobin	Immunity			Secreted			NaN	NaN	2.0738	NaN	NaN	NaN	2.115	NaN	NaN	NaN	NaN	3.7041	3.0718	NaN	NaN	NaN	NaN	0	0	1064800	0	0	0	2420600	675070	0	264350	0	7780900	8021600	0	1008600	0	0
Q3SZV7	Q3SZV7	HPX	Hemopexin	Transport			Secreted			0.54701	1.7465	0.38903	0.59832	0.71335	0.89979	1.4182	1.0361	1.0515	0.7529	1.3979	2.389	1.0927	0.44013	1.0954	1.2167	0.61797	7139400	14973000	1106900	14039000	6061300	5025300	18701000	16453000	14967000	4441700	19629000	41356000	22969000	3817400	17007000	14115000	5357700
Q2TBX4	Q2TBX4	HSPA13	Heat shock 70 kDa protein 13	Enzyme (ATPase)			Endoplasmatic Reticulum	Microsome		1.2384	1.8975	NaN	1.1797	NaN	NaN	1.7564	NaN	NaN	NaN	NaN	NaN	NaN	NaN	NaN	0.9866	NaN	8347400	12035000	0	6099100	5691900	6857700	9736200	4251800	6160600	6740300	0	5557900	6226300	7002100	14715000	10282000	3683600
Q0VCX2;F1N614	Q0VCX2	HSPA5	78 kDa glucose-regulated protein	Protein synthesis			Endoplasmatic reticulum	Cytoplasm		0.86504	1.1717	0.51401	1.2556	1.0038	1.141	1.4052	1.0881	1.1096	0.92268	1.2574	0.76671	1.0278	0.83701	1.2428	1.0329	1.0029	1826100	835030	444180	3589600	1693100	1693700	6692100	3698900	913240	894230	1415800	1548900	2436200	1669600	4331700	4116700	1607700
P19120;P34933	P19120	HSPA8	Heat shock cognate 71 kDa protein	Protein synthesis			Cytoplasm	Nucleus	Spliceosome	1.5328	1.1253	0.66249	1.2968	0.90978	1.3323	1.2448	1.0088	1.5682	0.97393	1.0406	0.61282	1.2939	0.74653	0.83481	1.125	1.4045	4973400	5132600	217690	4861900	1790700	3410100	1792900	2849600	4747300	1645000	1377800	738880	1717200	628660	2904300	761590	1164300
Q9XSG3	Q9XSG3	IDH1	Isocitrate dehydrogenase [NADP] cytoplasmic	Enzyme			Cytoplasm			1.2713	2.0781	0.31916	1.0709	0.85332	1.0618	1.3134	0.95571	1.4674	0.96059	0.74299	0.46162	0.97057	1.3691	0.79962	1.3896	1.4692	5515100	12633000	592550	17650000	6861700	11237000	18259000	13310000	10410000	8559500	6630300	2479100	13066000	11539000	6100000	7496100	4449700
Q3SYR8	Q3SYR8	IGJ	Immunoglobulin J chain	Immunity			Secreted			1.0343	1.1979	0.80667	0.5879	0.91575	0.73996	0.9145	0.9126	1.46	0.5326	0.61729	0.53959	1.5298	0.93977	0.35146	1.4564	1.3727	29852000	35224000	4005200	17518000	21307000	20286000	17227000	20120000	29338000	11893000	9135400	20991000	66273000	23461000	9273500	37623000	15784000
F1MZ96	F1MZ96	IGK		Immunity			Secreted			0.66649	0.9217	0.63249	1.3183	1.1076	1.0434	2.103	1.7845	0.80568	1.1456	0.64196	2.297	0.79464	0.4964	0.48088	0.77543	0.90869	65608000	104730000	14370000	247440000	77875000	106760000	215010000	190810000	49074000	57790000	32197000	166220000	99678000	59272000	63958000	98789000	40684000
F1MLW7	F1MLW7	IGLL1		Immunity			Secreted			1.2351	1.0759	0.34796	0.80904	1.0194	0.91721	1.6708	0.99832	0.70874	1.1313	0.61701	1.1319	3.253	0.86527	0.47795	0.86668	1.0245	801480000	448270000	25310000	845920000	488470000	623310000	1311500000	691670000	405820000	306060000	368830000	1081800000	1400200000	668770000	482520000	628390000	572850000
F1MMP5;Q0VCM5	Q0VCM5	ITIH1	Inter-alpha-trypsin inhibitor heavy chain H1	Protease inhibitor			Secreted			1.6736	1.3556	0.62883	NaN	0.86954	NaN	1.786	0.97155	NaN	1.2186	NaN	1.2782	1.6511	NaN	NaN	NaN	1.0191	1022900	2618400	234290	1035100	890420	643270	4465800	2079100	0	705210	161970	1905000	6372600	688750	443740	0	331560
F1MNW4	F1MNW4	ITIH2	Inter-alpha-trypsin inhibitor heavy chain H2	Protease inhibitor			Secreted			NaN	NaN	NaN	NaN	NaN	NaN	NaN	NaN	NaN	1.2498	NaN	NaN	NaN	NaN	NaN	NaN	NaN	531760	0	0	0	0	0	0	0	0	794530	0	1843100	0	0	0	0	0
F1MNV5;P01044	P01044	KNG1	Kininogen-1	Blood coagulation	Immunity		Secreted			0.8876	1.5924	0.96559	0.80204	1.3779	0.92442	1.3361	1.2032	1.3549	1.0208	1.082	0.98067	1.0469	0.76756	0.85121	0.83805	0.82116	26065000	42904000	4665500	47423000	24017000	27295000	36384000	26517000	12517000	11193000	8859000	35271000	29321000	17757000	29694000	24226000	5702200
P01045	P01045	KNG2	Kininogen-2	Blood coagulation	Immunity		Secreted			0.92757	NaN	1.505	NaN	3.1723	NaN	1.525	NaN	2.6141	2.1312	1.1831	NaN	NaN	NaN	NaN	NaN	NaN	2954900	5993300	1489300	0	4535500	3547700	3467000	4450200	3221500	3556800	1459400	0	3549700	0	2319800	0	140030
G3N0V2	G3N0V2	KRT1		Other			membrane			NaN	NaN	NaN	NaN	NaN	NaN	NaN	NaN	NaN	NaN	NaN	NaN	NaN	NaN	NaN	NaN	NaN	5378600	1558400	0	16324000	0	0	0	0	2074700	0	0	0	0	1791500	0	0	0
F1MC11;A1L595;G3N2P6	F1MC11	KRT17	Keratin, type I cytoskeletal 17	Other: hair growth			Cytoplasm			1.3241	NaN	1.9971	2.4969	2.9027	NaN	0.45965	NaN	1.0474	0.29861	NaN	NaN	NaN	NaN	0.30825	NaN	0.54149	2686300	0	886890	27219000	4435100	339260	617310	328030	1455400	412080	150410	678410	316860	391620	528900	599280	193860
Q148H7	Q148H7	KRT79	Keratin, type II cytoskeletal 79	Cell structure			Cytoskeleton			NaN	NaN	NaN	NaN	NaN	NaN	NaN	NaN	NaN	NaN	NaN	0.9871	NaN	NaN	NaN	0.4531	NaN	712340	1217000	902940	55441000	3741400	539820	1173000	1301900	2305900	579060	737800	1757100	2896400	4268400	1373000	2239100	709180
P00711	P00711	LALBA	Alpha-lactalbumin	Enzyme			Secreted			1.4997	0.76838	0.78002	1.0623	1.0427	1.064	0.68995	0.89404	0.89156	0.95216	0.82784	0.57484	0.62241	1.4187	0.81785	1.0121	0.83167	7517500000	5857000000	1397500000	13135000000	3329200000	7526100000	4660400000	7003700000	2269200000	2695900000	2691600000	2826300000	3156700000	7644700000	6712100000	6604600000	3996600000
F1MNN7;Q2TBI0	Q2TBI0	LBP	Lipopolysaccharide-binding protein	Transport			Secreted			NaN	NaN	NaN	NaN	NaN	1.102	NaN	1.0137	NaN	0.5783	NaN	NaN	NaN	NaN	1.8609	1.7227	NaN	152880	489070	0	1888900	412010	3400500	430910	1461300	659110	262830	360460	570100	4567000	353620	4592900	2528600	0
Q5E9B1;P19858;E1BNS9;F1MK19	Q5E9B1	LDHB	L-lactate dehydrogenase B chain	Enzyme			Cytoplasm			0.73123	1.307	1.5958	1.2673	NaN	0.53407	1.0211	0.83673	1.2814	0.77252	0.65336	0.84775	NaN	1.1795	0.79131	0.87053	1.0378	816410	3709500	924720	2208300	476190	900210	1321600	1900300	2088600	1057400	501480	1635800	1595400	2189200	1970600	1705600	654260
P02754	P02754	LGB		Transport			Secreted			0.6104	0.69543	0.75334	0.94507	0.79111	1.0607	0.87616	1.0665	0.98847	0.67718	1.0081	0.75192	0.6942	1.0461	1.0425	0.78844	0.9329	17817000000	18030000000	8588900000	37175000000	15207000000	29844000000	24077000000	23437000000	12946000000	9277000000	12851000000	21401000000	14869000000	25167000000	28764000000	18100000000	12994000000
G3N1R1;G3N1H5;G3N3Q3;G3N188;G3MWT1	G3N1R1	LOC100300716	Ig heavy chain V region	Immunity			Secreted			0.5852	1.1329	0.91944	1.072	0.89213	0.8605	1.5547	1.0865	1.1393	0.84751	0.87188	0.90188	1.9169	0.72036	0.68664	1.2742	1.3645	4291600	8319700	1665000	13794000	6178400	8684200	13078000	7980900	7066500	3652900	4297300	4480400	12117000	3938600	6567900	7263200	8245700
G3MXD9;G3MZH0	G3MXD9	LOC100300806		Immunity			Secreted			NaN	NaN	NaN	1.7662	NaN	1.3215	2.0602	1.2382	NaN	NaN	NaN	NaN	NaN	NaN	NaN	1.1858	NaN	0	0	0	3568600	0	2531300	4357300	2218300	707090	0	626490	945290	1762900	465740	840210	1970900	280510
F1MLW8	F1MLW8	LOC100847119		Unknown			Unknown			2.1418	1.246	NaN	1.0954	NaN	0.84527	2.1477	2.9568	0.54643	0.96973	0.2697	1.745	2.6582	0.36358	0.7802	0.67458	1.3628	8481200	10232000	239090	15973000	835490	7221600	23536000	29343000	1019600	1027600	1009000	17876000	58773000	2478400	7607900	8084200	4523700
E1BI82	E1BI82	LOC525947		Transport			Secreted			NaN	NaN	NaN	NaN	NaN	NaN	NaN	NaN	NaN	NaN	NaN	NaN	NaN	NaN	NaN	NaN	NaN	0	0	0	0	0	0	0	0	0	108870	0	0	599370	0	0	0	0
E1BH06	E1BH06	LOC617696		Immunity			Secreted			1.4465	1.1509	0.77296	0.88015	1.2082	1.2159	1.2123	0.93557	NaN	0.98433	NaN	1.6339	1.8781	NaN	1.2822	NaN	0.74858	1115100	1057300	392830	1909200	1190600	4655500	3495500	3274500	343180	1180200	326290	3543100	10017000	0	2425600	1155700	1586100
G3MZU3;E1BJP1	G3MZU3	LOC783399		Transport			Secreted			NaN	0.6373	NaN	NaN	NaN	NaN	NaN	0.98037	NaN	NaN	NaN	3.0765	2.4509	NaN	NaN	4.4026	NaN	369190	963410	0	449380	0	453380	971300	1538600	0	471390	0	16586000	6395000	107040	0	14033000	249300
P11151	P11151	LPL	Lipoprotein lipase	Enzyme	Metabolism		Cell membrane	Membrane	Secreted	1.3743	NaN	1.9186	1.8792	NaN	1.4808	0.82763	1.0308	1.0827	NaN	NaN	NaN	1.1773	1.178	NaN	2.4767	NaN	1208500	333410	1646400	2003300	0	5283800	1039900	2155100	572760	209690	170180	287580	2043200	1899300	795430	4809400	429790
P80025	P80025	LPO	Lactoperoxidase	Immunity	Enzyme		Secreted			1.1453	1.1071	0.53599	1.0997	1.2226	1.334	0.75934	1.092	0.65568	1.1845	0.66938	1.0282	1.1235	0.76745	1.7872	0.99541	1.0302	198550000	120920000	28202000	650020000	230280000	345100000	156620000	169400000	85645000	98456000	83456000	274730000	157160000	170260000	446200000	206680000	99870000
Q2KIF2	Q2KIF2	LRG1	Leucine-rich alpha-2-glycoprotein 1	Cell differentiation			Endoplasmatic reticulum			0.84725	NaN	NaN	0.93623	1.1098	NaN	1.3839	1.0675	0.97136	0.92011	1.2178	1.3259	1.0823	0.88743	1.1435	1.0928	1.0679	2060900	968530	153530	1921900	1757800	990330	2534500	1355900	690020	1364400	948970	2215200	2425900	960790	3296500	3111700	843230
P24627	P24627	LTF	Lactotransferrin	Transport	Immunity		Secreted			0.20586	0.99541	1.7521	1.036	0.62006	0.79457	0.60347	0.94668	1.0209	0.96062	0.91952	2.036	1.6632	0.75828	0.69022	1.4463	0.77692	374320000	1355000000	619030000	2856600000	579750000	1450600000	967820000	1289500000	903620000	811530000	692090000	2382100000	2608400000	1104000000	1644800000	2160000000	525680000
F1MVS9	F1MVS9	MASP1		Enzyme			Secreted			NaN	NaN	NaN	NaN	NaN	NaN	NaN	NaN	NaN	NaN	0.96211	NaN	NaN	NaN	NaN	NaN	NaN	0	636500	0	0	153340	0	0	0	255090	0	473200	0	0	59464	0	0	0
P02192	P02192	MB	Myoglobin	Transport			Unknown			NaN	1.8875	NaN	NaN	NaN	NaN	NaN	NaN	NaN	NaN	NaN	NaN	NaN	NaN	NaN	NaN	NaN	0	6359200	0	0	0	0	0	0	0	0	0	0	0	0	0	0	0
F1MXX6;Q95114;G3MYW7	Q95114	MFGE8	Lactadherin	Cell	Immunity		Membrane	Secreted		0.91374	1.3075	0.50866	1.0537	0.86824	1.0371	0.95196	1.3599	0.70022	0.92198	1.6714	0.37129	1.3005	1.0701	1.5548	4.7681	0.88746	27532000	52016000	5671600	52251000	17834000	43956000	47008000	56925000	9418500	10382000	23147000	7490300	53333000	36077000	61993000	211360000	10881000
Q2KIT0	Q2KIT0	MGC137014	Protein HP-20 homolog	Other			Secreted			NaN	NaN	0.42367	NaN	NaN	NaN	NaN	NaN	NaN	NaN	NaN	NaN	NaN	NaN	NaN	NaN	NaN	350490	677670	535920	644170	389910	0	0	0	0	348050	0	3275900	627080	179080	312690	0	125790
Q2KIU3	Q2KIU3	MGC137211	Protein HP-25 homolog 2	Other			Secreted			0.97959	NaN	NaN	NaN	NaN	NaN	NaN	NaN	NaN	NaN	NaN	NaN	NaN	NaN	0.73512	NaN	NaN	2014700	1578100	0	3191600	457580	2149700	3355900	2064400	576630	790740	932680	1164300	1995600	1307100	2490200	311000	206010
E1BGW1;Q8MI01;G5E6S0	Q8MI01	MUC15	Mucin-15	Immunity			Secreted	Cell membrane		0.71297	1.7067	NaN	NaN	NaN	NaN	NaN	NaN	1.3012	NaN	NaN	1.0296	NaN	1.6902	NaN	NaN	NaN	6032900	6647100	623920	0	2176800	0	0	0	4302900	3258700	5041400	4945800	0	4730900	0	868350	1736800
F1MRC2;Q9BE41;Q9BE40;F1N775;F1MTZ2;F1N2G0;Q9BE39;F1MZX6;F1MM07	Q9BE41	MYH2	Myosin-2	Other: muscle contraction			Cytoplasm			NaN	6.431	NaN	NaN	NaN	NaN	NaN	NaN	NaN	NaN	NaN	NaN	NaN	NaN	NaN	NaN	NaN	0	150750000	0	0	0	0	0	0	0	0	0	0	0	0	0	0	0
A0JNJ5;P85100;F6RF62	A0JNJ5	MYL3	Myosin light chain 3	Other: muscle contraction			Cell membrane			NaN	NaN	NaN	NaN	NaN	NaN	NaN	NaN	NaN	NaN	NaN	NaN	NaN	NaN	NaN	NaN	NaN	0	27782000	0	0	0	0	0	0	0	0	0	0	0	0	0	0	0
A6QR11	A6QR11	NELL2	Protein kinase C-binding protein NELL2	Other	calcium		Secreted			0.96196	0.64494	0.48638	1.1194	0.67621	1.3608	1.2683	1.5015	2.1017	0.89162	1.3564	0.45364	1.0128	1.3951	0.7623	1.205	0.98861	4504600	5228200	739120	10799000	3360700	10085000	8478100	15157000	12147000	2432000	6853000	1930200	7366400	8624100	5799300	11073000	5989800
Q3T0Q4;F1MPL4;P52174;P52175	P52175	NME2	Nucleoside diphosphate kinase B	Enzyme	Other (nucleotide metabolism)		Cytoplasm	Cell membrane		NaN	NaN	NaN	NaN	NaN	0.79982	NaN	NaN	NaN	NaN	NaN	0.91837	NaN	NaN	1.0075	NaN	NaN	418110	519020	0	700600	358780	1290800	487670	392320	0	362200	189570	677880	701610	463690	1474300	754770	202740
P79345	P79345	NPC2	Epididymal secretory protein E1	Transport			Endoplasmatic reticulum	Lysosome	Secreted	1.1272	1.0369	0.70806	0.80951	1.1583	1.218	1.1122	1.171	1.4777	1.1806	0.92596	0.38217	0.92778	0.969	0.89904	1.2755	1.0843	142960000	122080000	20228000	131170000	100420000	95171000	118950000	122490000	123220000	116440000	83577000	47660000	144170000	151180000	146390000	165820000	78611000
Q0P569	Q0P569	NUCB1	Nucleobindin-1	Other	calcium		Cytoplasm	Golgi apparatus	Membrane	0.97232	0.84883	0.50929	0.84758	1.0072	0.81217	1.0651	1.0074	1.3223	1.0349	1.4207	0.52452	0.86661	0.79098	0.81163	1.011	1.253	144510000	124430000	20685000	232600000	96558000	157690000	167470000	157130000	117040000	63940000	104370000	63903000	180750000	118080000	189910000	135990000	81524000
Q0IIH5	Q0IIH5	NUCB2	Nucleobindin 2	Other	calcium		Nucleus	Membrane		1.6421	1.0006	0.38799	0.81458	1.1352	0.95483	0.79374	1.2248	0.99958	0.92255	1.0663	0.84731	1.0463	1.0234	1.119	1.1166	1.4979	33192000	31091000	2383200	49993000	24586000	41868000	26738000	37360000	19899000	10402000	21336000	15035000	35381000	35810000	33586000	30210000	19807000
F1MX65;Q3MHX6	Q3MHX6	OS9	Protein OS-9	Protein synthesis	Other: ER degradation		Endoplasmatic Reticulum			0.81715	1.0972	NaN	1.0298	0.99866	1.0677	1.5219	1.117	NaN	0.80167	1.4424	1.0824	0.80521	0.90893	1.2709	1.3289	1.0677	1402100	3527800	232200	6928100	2178800	3141200	6124400	5772100	683650	665850	4744800	964610	3940900	5250400	2539500	3249200	4571800
A6H7J6;P05307	P05307	P4HB	Protein disulfide-isomerase	Enzyme			Endoplasmatic Reticulum	Cell membrane	Membrane	1.0346	0.96329	NaN	1.3638	0.99615	NaN	1.1671	1.0401	1.2125	1.0958	0.95786	0.88541	0.89921	0.8991	0.96694	1.1944	0.89441	1126600	2187300	82730	4589800	1631000	997520	2692700	1438300	1630900	978240	1135400	862690	2316800	1689300	2333800	1803500	701760
P13696	P13696	PEBP1	Phosphatidylethanolamine-binding protein 1	Protease inhibitor			Cytoplasm			NaN	1.1934	NaN	1.3462	0.94998	NaN	NaN	NaN	1.3959	0.9326	NaN	NaN	NaN	NaN	NaN	NaN	0.98847	411170	1839700	0	2882200	873300	926720	1058300	976370	963610	524740	451800	0	654350	523310	0	939160	604480
F1MR22;F6PQI6	F6PQI6	PIGR		Immunity			Unknown			NaN	NaN	NaN	NaN	NaN	NaN	NaN	NaN	NaN	NaN	NaN	NaN	NaN	NaN	NaN	NaN	NaN	0	0	0	0	0	0	0	0	0	0	0	0	0	0	0	0	0
P81265;G5E6M1	P81265	PIGR	Polymeric immunoglobulin receptor	Transport	Immunity		Cell mebrane	Secreted		1.5258	2.3508	1.2049	0.49991	1.081	1.0776	0.58345	1.2107	0.98931	1.1408	0.84742	0.72688	1.6922	0.81727	0.47444	1.2876	0.87451	1265400000	1803700000	248530000	801440000	624280000	1038900000	596220000	1166100000	579210000	515310000	465520000	578020000	1664300000	645600000	621880000	1216200000	410380000
E1B726;P06868;A7E350	P06868	PLG	Plasminogen	Blood coagulation			Secreted			1.3883	1.7516	0.41998	NaN	1.2167	1.0446	NaN	0.86111	NaN	0.88163	NaN	1.6177	NaN	0.56785	1.1866	1.0207	NaN	704580	2999900	86013	455260	855520	2048500	1623100	1543600	0	724680	258690	1476300	624380	546010	1132500	1811300	0
F1N1N6;Q9TUM6;F1MHI1;F1MQB0	Q9TUM6	PLIN2	Perilipin-2	Transport	Lipid		Membrane			NaN	NaN	NaN	1.9768	1.0391	1.3816	1.5654	NaN	NaN	NaN	NaN	NaN	0.87191	0.82535	0.96657	2.879	1.3162	0	1364900	0	1750500	360600	1301200	1586400	0	208710	0	0	487170	510440	414020	1468000	4118900	311310
Q3SX32	Q3SX32	PLIN3	Mannose 6 phosphate receptor binding protein 1	Transport	Lipid		Unkown			NaN	NaN	NaN	NaN	0.89258	NaN	NaN	NaN	NaN	NaN	NaN	NaN	NaN	NaN	NaN	NaN	2.1475	930820	281920	52102	0	647710	0	1705000	0	843480	0	636670	417100	405050	0	0	0	2016700
F1MYX5;F1MSB7;A7E3Q8	A7E3Q8	PLS3	Plastin-3	Protein synthesis	Other: bundling protein		Cytoplasm			NaN	NaN	NaN	NaN	NaN	NaN	NaN	NaN	NaN	NaN	NaN	1.0015	NaN	NaN	NaN	NaN	NaN	0	0	0	0	0	0	0	0	0	0	0	272380	412450	0	178100	188220	0
P62935;G3X8B1	P62935	PPIA	Peptidyl-prolyl cis-trans isomerase A	Enzyme			Cytoplasm	Secreted		1.3194	1.0968	0.57947	1.0755	1.2013	1.1377	0.84248	1.1887	1.2434	1.1541	1.2829	0.98811	1.03	1.0644	1.028	1.553	1.0654	6118600	4566600	484900	3075000	1599800	2319300	2329800	3768000	2400000	1936700	1959100	2373600	2675200	3578000	3453800	7082200	1255200
P26779;F1MXP8	P26779	PSAP	Proactivator polypeptide	Enzyme			Lysosome			1.4244	2.1659	0.78783	1.087	1.0062	1.5227	0.86344	0.92333	1.5243	1.2446	0.8065	0.51153	0.90946	1.1184	1.0924	0.74381	1.2905	9504400	24486000	5901800	26775000	9020600	15626000	13675000	8359400	14032000	4965600	7137100	7501900	13097000	11042000	13042000	10116000	5537400
F1MM32	F1MM32	QSOX1		Enzyme			Gologi apparatus	secreted		1.0329	2.0427	NaN	0.85795	1.332	1.5434	0.93487	NaN	NaN	0.73079	NaN	1.631	1.4838	0.70869	1.8635	0.78453	NaN	1369000	4905400	63614	4569400	2673100	4843800	2029900	765520	0	255870	198440	2622200	4485800	1376900	2327300	1953400	0
A1L528;Q3ZBD1;Q2HJH2;Q1RMR4;A4FV54;F1N2J9;Q2HJI8;Q58DS5;A6QLS9	A1L528	RAB1B	Ras-related protein Rab-1B	Transport			Cytoplasm	Membrane		NaN	NaN	NaN	NaN	NaN	NaN	NaN	NaN	NaN	NaN	NaN	NaN	NaN	NaN	NaN	2.3124	NaN	0	0	0	0	199010	0	0	0	0	0	155930	193600	0	528140	0	678880	0
P62998;Q9TU25;A4FV20;E1BLE9;Q1RMI2;Q2KJ93	P62998	RAC1	Ras-related C3 botulinum toxin substrate 1	Cellular response			Cytoplasm	Membrane	Cell membrane	NaN	1.3792	0.88667	NaN	0.93823	0.79369	NaN	NaN	NaN	NaN	1.1901	NaN	NaN	NaN	NaN	NaN	1.0527	375250	2376100	370680	0	1961100	948560	0	0	965850	295470	1093800	277910	0	1481600	394500	2609500	951110
G1K122;P18902	P18902	RBP4	Retinol-binding protein 4	Transport			Secreted			NaN	NaN	NaN	NaN	NaN	NaN	NaN	NaN	NaN	NaN	NaN	NaN	NaN	NaN	NaN	NaN	NaN	471590	4500800	389950	3743700	1596000	1752000	2575600	1861100	1132400	473510	1162500	812520	4177400	1545700	0	1792500	709290
P61585;Q1RMJ6	P61585	RHOA	Transforming protein RhoA	Cell splicing			Cytoskeleton	Cell membrane	Cytoplasm	NaN	1.6257	0.61704	NaN	0.98567	1.3508	1.0561	1.1733	1.4643	0.90807	0.95519	0.73031	1.1046	1.3905	1.5149	2.0051	1.3401	473570	2123700	428450	918050	898440	2029300	1975300	1949500	1276500	796510	781480	531370	2428800	2099200	3170000	3756700	401460
Q58DP6;P15467	P15467	RNASE4	Ribonuclease 4	Enzyme	Immunity		Secreted			0.80494	1.3653	0.68947	0.75715	0.59757	1.0877	0.80757	1.3423	2.161	1.264	1.0476	0.96391	1.5762	1.0237	0.90048	1.0132	1.0876	5471300	11097000	1149000	7661900	1991600	10505000	7120100	10583000	11093000	4898000	4325700	5256300	6123800	9991000	13037000	12176000	2562700
F1MMW8;P35541;E1BJF9	P35541	SAA1	Serum amyloid A protein	Immunity (Acute Phase)			Secreted			NaN	NaN	NaN	NaN	NaN	NaN	NaN	NaN	NaN	NaN	NaN	NaN	NaN	NaN	NaN	NaN	NaN	0	784010	432440	0	74470	0	0	283750	0	278530	0	689280	3864600	652070	201760	1464300	54278
A0JNP2	A0JNP2	SCGB1D	Secretoglobin family 1D member	Protein synthesis			Secreted			NaN	NaN	NaN	NaN	NaN	NaN	NaN	NaN	NaN	NaN	NaN	3.0301	NaN	NaN	NaN	NaN	NaN	0	0	0	4327400	0	0	2518900	1487600	0	566890	0	12843000	0	0	0	24220000	0
A6QPK0	A6QPK0	SCGB2A2	Secretoglobin, family 2A, member 2	Transport			Secreted			NaN	0.52192	NaN	NaN	NaN	NaN	NaN	NaN	NaN	NaN	NaN	2.3477	NaN	NaN	3.3344	3.604	NaN	0	1337400	0	1912400	0	2810900	676400	0	0	0	124880	12843000	0	66411	22241000	19745000	298000
Q3ZBZ1	Q3ZBZ1	SDF4	45 kDa calcium-binding protein	Other: calcium regulation			Golgi apparatus			1.0371	0.6863	0.4253	1.1154	0.93788	1.2387	0.79936	0.98231	1.4682	1.2802	1.0684	0.66729	0.7672	1.1246	1.306	1.0036	1.3183	10750000	5322700	865880	17536000	5512100	11179000	9349200	9962300	7407900	4805800	5572100	6286700	14239000	11846000	12283000	15650000	4427900
A8YXY3	A8YXY3	SEP15	15 kDa selenoprotein	Enzyme			Endoplasmatic Reticulum			1.212	0.98345	0.49676	1.0454	1.1316	1.0691	0.93987	1.0242	1.2732	1.1558	NaN	NaN	1.0025	0.85537	1.288	1.2	1.4972	2888800	1219300	148070	1970200	3075500	3987500	4651900	2828400	3065100	1720600	480090	313820	3367300	2870000	2024700	6449900	2123900
P34955	P34955	SERPINA1	Alpha-1-antiproteinase	Protease inhibitor			Secreted			0.72279	1.2654	0.67984	0.70937	1.1121	0.96392	1.2275	0.98274	0.80477	1.1046	0.96622	1.3888	1.0036	0.62056	0.77702	0.93989	0.75346	38155000	150170000	6270700	122340000	59977000	96695000	125650000	77886000	23945000	30635000	56140000	102140000	110930000	46825000	64458000	100710000	28904000
A2I7M9;Q9TTE1	Q9TTE1	SERPINA3-2	Serpin A3-2	Protease inhibitor			Cytoplasmic vesicle	Secreted		0.63987	2.1097	0.53211	0.75561	0.90799	0.63544	2.254	0.66107	0.69184	0.52006	1.1768	2.9134	0.87661	0.56267	0.96501	1.0587	0.47057	37214000	134620000	4533100	60776000	36588000	51326000	150050000	30223000	14744000	13352000	25208000	111660000	46916000	21451000	49672000	65437000	10863000
Q3ZEJ6	Q3ZEJ6	SERPINA3-3	Serpin A3-3	Protease inhibitor			Secreted	Cytoplasmic vesicle		NaN	NaN	NaN	NaN	NaN	NaN	NaN	NaN	NaN	NaN	NaN	NaN	NaN	NaN	NaN	NaN	NaN	1742400	1710200	360360	1446400	900420	1552000	6661400	1192100	457620	0	1159700	6485900	1686600	284430	2786800	2523500	0
G8JKW7;A2I7N1	A2I7N1	SERPINA3-5	Serpin A3-5	Protease inhibitor			Secreted	Cytoplasmic vesicle		0.8409	2.2999	0.44534	0.56019	0.7643	0.6705	2.348	0.52566	0.60053	0.58	1.049	1.0402	0.5721	0.40939	1.0008	1.3411	0.67623	13839000	97898000	4140000	36939000	14803000	44999000	83464000	24677000	22634000	10071000	23351000	56329000	14142000	16539000	75341000	71193000	12700000
A2I7N2	A2I7N2	SERPINA3-6	Serpin A3-6	Protease inhibitor			Cytoplasmic vesicle	Secreted		NaN	NaN	NaN	NaN	NaN	NaN	NaN	NaN	NaN	NaN	NaN	NaN	NaN	NaN	NaN	NaN	NaN	0	1628900	0	0	0	0	0	0	0	0	0	0	0	0	0	0	0
A2I7N3	A2I7N3	SERPINA3-7	Serpin A3-7	Protease inhibitor			Secreted	Cytoplasmic vesicle		0.58543	2.459	0.80418	0.67208	0.84118	0.80182	1.887	0.58575	0.73229	0.4892	1.1873	2.7985	0.95734	0.81498	0.77705	0.89626	0.50808	8652500	90585000	3720000	23774000	14628000	24097000	52035000	13146000	12304000	6332900	18702000	109540000	35379000	22507000	28500000	34812000	7764000
A6QPQ2	A6QPQ2	SERPINA3-8	Serpin A3-8	Protease inhibitor			Cytoplasmic vesicle	Secreted		NaN	2.1941	NaN	NaN	NaN	NaN	1.8772	NaN	NaN	NaN	NaN	2.6511	0.76783	NaN	1.1899	1.0989	NaN	1385200	3276700	539860	13354000	1720000	9031000	3371600	2870500	1327300	0	966800	9648200	7785500	4238100	11476000	3123200	834410
Q1JPB0;G1K1L8	Q1JPB0	SERPINB1	Leukocyte elastase inhibitor	Protease inhibitor			Cytoplasm			NaN	NaN	3.2323	NaN	NaN	NaN	NaN	NaN	NaN	NaN	NaN	NaN	NaN	NaN	NaN	NaN	NaN	0	0	869380	0	0	0	0	433680	0	164440	0	674780	436180	0	0	0	128590
F1MSZ6	F1MSZ6	SERPINC1	Antithrombin-III	Blood coagulation			Secreted			0.76567	1.6798	0.41265	1.0442	1.085	1.0488	1.3398	1.004	0.98387	0.8886	1.1434	0.99116	1.288	0.72099	1.0095	1.0041	0.76841	12450000	43922000	2826400	49098000	24176000	40119000	55215000	26037000	16330000	13024000	13983000	26513000	25077000	17465000	28014000	29897000	7542500
A6QPP2	A6QPP2	SERPIND1	Serpin peptidase inhibitor, clade D (heparin cofactor), member 1	Protease inhibitor			Unknown			NaN	NaN	NaN	NaN	1.1662	NaN	NaN	NaN	NaN	1.1521	NaN	NaN	1.221	NaN	NaN	NaN	NaN	434420	3535900	64456	2032300	1324100	605850	2102200	1962700	766080	901880	1130800	547830	1025400	0	0	0	52418
Q95121	Q95121	SERPINF1	Pigment epithelium-derived factor	Cell differentiation	Other: neurotrophic		Secreted			0.77321	1.4338	NaN	0.96084	1.1727	1.1184	1.1808	1.0549	1.4798	0.82403	1.0778	1.2583	1.6494	0.7915	1.3756	1.1177	NaN	1151600	1784100	247110	1434900	584400	1185800	1957400	1562900	1166200	748100	635190	2142400	3812000	1119200	3398000	1963900	148870
P28800	P28800	SERPINF2	Alpha-2-antiplasmin	Protease inhibitor	Immunity		Secreted			0.91376	1.5325	0.38104	1.1172	1.066	1.0748	1.5529	0.98496	1.1235	0.96218	0.89728	1.3979	0.97949	0.68635	1.0333	1.215	0.84096	1582400	6149600	292650	5848300	3617200	4827000	7058700	4051100	3685200	1314800	3673200	3489000	5298600	2053600	3150900	3022100	2288600
P50448	P50448	SERPING1	Factor XIIa inhibitor	Blood coagulation			Secreted			1.1804	0.98191	0.52487	0.89884	1.0313	0.93839	0.98029	0.81958	0.92896	0.94891	1.0359	1.1817	0.98041	0.90983	0.99148	0.73541	0.8177	37565000	18034000	2528600	42382000	10078000	28381000	18889000	18923000	6251000	7370400	5247200	13858000	23721000	22941000	34205000	29906000	10935000
E1BMJ0	E1BMJ0	SERPING1		Protease inhibitor			Secreted			NaN	NaN	NaN	NaN	NaN	NaN	NaN	NaN	NaN	NaN	NaN	NaN	NaN	NaN	NaN	NaN	NaN	0	0	0	0	0	15153000	1442400	0	8690600	550610	1596500	0	0	0	0	0	0
Q32KV6	Q32KV6	SIL1	Nucleotide exchange factor SIL1	Transport			Endoplasmatic Reticulum			1.0195	1.0364	0.32821	1.0182	1.1605	1.1149	1.1711	1.1845	1.2928	0.91132	1.3977	0.68671	1.0022	1.1196	0.91578	1.056	1.2197	5540300	5561300	684940	8183400	6924600	5638400	7565300	8316800	6326000	3583200	6510500	2678500	4985200	9430300	8608000	7658700	4165500
F1N6D4;Q27960	Q27960	SLC34A2	Sodium-dependent phosphate transport protein 2B	Transport			Membrane			NaN	1.3018	NaN	0.58769	0.60485	1.9284	0.86352	0.934	1.6177	NaN	0.67995	0.16964	0.70118	1.271	0.93177	2.2203	0.83451	516680	1326700	31143	1715300	389320	1936900	515460	2503000	4147900	76250	1955400	92580	1026700	700530	510620	3740600	1383800
E1BF27	E1BF27	SLC38A10		Unknown			membrane			0.63544	1.264	NaN	NaN	1.0382	NaN	0.99593	1.1374	1.1491	1.1748	1.1601	0.542	1.2139	0.94664	0.70684	1.0023	1.3608	1350800	1900200	0	495660	1226900	404990	2740700	2846300	1537200	1724400	1094500	930570	3766200	963120	2152300	2245100	1908600
P31096;F1MI46;P31098;Q58DM6	P31096	SPP1	Osteopontin	Cell adhesion			Secreted			0.70888	0.46755	0.87593	0.59074	1.2249	0.41238	2.1396	0.4502	0.79604	0.65072	0.88005	1.2995	0.8193	1.0286	0.35514	0.50757	0.65586	73150000	127430000	15041000	364850000	127030000	110070000	385620000	220660000	222730000	58061000	236750000	134620000	537580000	266690000	191340000	290030000	90679000
Q29443	Q29443	TF	Serotransferrin	Transport			Secreted			1.1105	1.5008	1.1298	1.3229	1.1469	0.3078	0.26963	1.2582	0.91622	1.1444	1.3819	1.6928	1.8611	0.50604	0.43316	0.51467	0.82409	581210000	608400000	93365000	1202600000	368040000	322750000	377720000	630790000	284140000	338760000	360140000	628150000	839070000	385130000	558000000	482510000	200340000
F1N3A1;Q28178	Q28178	THBS1	Thrombospondin-1	Cell adhesion			Secreted			NaN	NaN	NaN	NaN	NaN	NaN	NaN	NaN	NaN	2.5578	NaN	0.87184	NaN	NaN	NaN	1.502	NaN	0	737260	0	1653000	0	0	0	0	532460	2737000	0	1644000	2284800	0	981060	1235800	0
Q5KR48;A6QR15;Q5KR47;Q5KR49;F1MV90	Q5KR48	TPM2	Tropomyosin beta chain	Other: muscle contraction			Cytoplasm	Cytoskeleton		NaN	NaN	NaN	NaN	NaN	NaN	NaN	NaN	NaN	NaN	NaN	NaN	NaN	NaN	NaN	NaN	NaN	0	4497800	0	0	0	0	0	0	0	0	0	0	0	0	0	0	0
O46375	O46375	TTR	Transthyretin	Transport			Secreted			0.78964	1.2941	1.2901	1.2193	1.0463	0.97432	0.88998	0.97058	1.2696	0.94747	1.1606	0.89736	1.3058	0.84649	1.203	0.88179	0.98425	14918000	26514000	4875700	30401000	14867000	18456000	17538000	21446000	11189000	9916000	16259000	16846000	29528000	3690300	30522000	5780000	5647200
G3N1C8	G3N1C8	Uncharacterised		Enzyme			Unknown			1.0395	1.3992	0.50278	NaN	0.92609	0.65902	NaN	NaN	0.5476	NaN	NaN	NaN	NaN	0.50901	NaN	0.69011	NaN	1023700	4500700	280150	1918400	1277300	1102300	0	0	814290	612910	535690	9671100	0	1313300	403250	1525200	658890
F1MUP9	F1MUP9	VAT1		Enzyme			Unknown			NaN	1.3859	NaN	NaN	NaN	NaN	NaN	NaN	2.0233	NaN	NaN	NaN	NaN	NaN	NaN	NaN	NaN	0	891900	56820	913360	246300	579570	863740	507320	794170	0	138260	0	479610	389080	578260	546390	215590
G3MX65;Q3T0Z0	Q3T0Z0	WFDC2	WAP four-disulfide core domain 2	Protease inhibitor			Secreted			0.82915	NaN	NaN	NaN	NaN	NaN	NaN	NaN	NaN	1.1152	NaN	NaN	NaN	NaN	NaN	1.7784	NaN	1066900	360590	55211	1439200	132270	0	217040	483420	109080	763200	120820	518660	1273900	0	0	2142100	0
F1MUT3;E1BBX5	F1MUT3	XDH	Xanthine dehydrogenase/oxidase	Enzyme			Cytoplasm	Secreted		0.96721	1.2889	0.92493	0.58716	1.188	1.1239	1.4545	0.79555	1.5381	1.2636	0.74514	0.66968	0.77889	1.1441	1.0898	0.93297	1.3145	836050000	805980000	195080000	635050000	444740000	878400000	925990000	493030000	593380000	500160000	275870000	514530000	490550000	709140000	843970000	540380000	322280000
Q3T000	Q3T000	YKT6	Synaptobrevin homolog YKT6	Transport			Cytoplasm	Membrane	Golgi apparatus	NaN	NaN	NaN	1.0717	0.36286	1.2658	1.2281	0.85402	NaN	NaN	NaN	NaN	NaN	1.1494	1.153	NaN	NaN	295160	0	0	1069800	622090	491590	742710	708770	561850	357570	0	0	243990	558360	930340	244700	170840
P68250;Q0VC36;A7Z057;P68252;P68509;Q3SZI4;F1MPT3	P68250	YWHAB	14-3-3 protein beta/alpha	Signalling			Cytoplasm			NaN	NaN	NaN	NaN	NaN	NaN	NaN	NaN	NaN	NaN	NaN	NaN	NaN	NaN	NaN	NaN	NaN	0	291690	0	744420	0	192870	254410	198960	260100	0	0	116330	406580	315160	0	433550	240700
P62261	P62261	YWHAE	14-3-3 protein epsilon	signalling			Cytoplasm			NaN	NaN	NaN	NaN	NaN	NaN	NaN	NaN	NaN	NaN	NaN	NaN	NaN	NaN	NaN	NaN	NaN	0	0	0	0	0	0	0	0	0	0	0	0	0	198640	0	0	0
